# Supplementary material for: Optimal VAsopressor TitraTION in patients 65 years and older (OVATION-65): protocol and statistical analysis plan for a randomised clinical trial
Source: PubMed Central journal article supplement — BMJ Open. 2020 Nov 14;10(11):e037947. doi: 10.1136/bmjopen-2020-037947 (PMC7668371; doi:10.1136/bmjopen-2020-037947), 2020-11-14
Supplement: bmjopen-2020-037947.draft_revisions.pdf [file bmjopen-2020-037947.draft_revisions.pdf]

# BMJ Open

BMJ Open is committed to open peer review. As part of this commitment we make the peer review history of every article we publish publicly available.

When an article is published we post the peer reviewers' comments and the authors' responses online. We also post the versions of the paper that were used during peer review. These are the versions that the peer review comments apply to.

The versions of the paper that follow are the versions that were submitted during the peer review process. They are not the versions of record or the final published versions. They should not be cited or distributed as the published version of this manuscript.

BMJ Open is an open access journal and the full, final, typeset and author-corrected version of record of the manuscript is available on our site with no access controls, subscription charges or pay-per-view fees (<http://bmjopen.bmj.com>).

If you have any questions on BMJ Open's open peer review process please email [info.bmjopen@bmj.com](mailto:info.bmjopen@bmj.com)

# BMJ Open

## Optimal VAsopressor Titration in patients 65 years and older (OVATION-65) – protocol and statistical analysis plan for a randomized clinical trial

|                               |                                                                                                                                                                                                                                                                                                                                                                                                                                                                                                                                                                                                                                                                                                                                                                                                                                                                                                                                                                                                                                                                                                                                                                                                                                                                                                                                                                                                                                                                                                                                                                                                                        |
|-------------------------------|------------------------------------------------------------------------------------------------------------------------------------------------------------------------------------------------------------------------------------------------------------------------------------------------------------------------------------------------------------------------------------------------------------------------------------------------------------------------------------------------------------------------------------------------------------------------------------------------------------------------------------------------------------------------------------------------------------------------------------------------------------------------------------------------------------------------------------------------------------------------------------------------------------------------------------------------------------------------------------------------------------------------------------------------------------------------------------------------------------------------------------------------------------------------------------------------------------------------------------------------------------------------------------------------------------------------------------------------------------------------------------------------------------------------------------------------------------------------------------------------------------------------------------------------------------------------------------------------------------------------|
| Journal:                      | <i>BMJ Open</i>                                                                                                                                                                                                                                                                                                                                                                                                                                                                                                                                                                                                                                                                                                                                                                                                                                                                                                                                                                                                                                                                                                                                                                                                                                                                                                                                                                                                                                                                                                                                                                                                        |
| Manuscript ID                 | bmjopen-2020-037947                                                                                                                                                                                                                                                                                                                                                                                                                                                                                                                                                                                                                                                                                                                                                                                                                                                                                                                                                                                                                                                                                                                                                                                                                                                                                                                                                                                                                                                                                                                                                                                                    |
| Article Type:                 | Protocol                                                                                                                                                                                                                                                                                                                                                                                                                                                                                                                                                                                                                                                                                                                                                                                                                                                                                                                                                                                                                                                                                                                                                                                                                                                                                                                                                                                                                                                                                                                                                                                                               |
| Date Submitted by the Author: | 22-Feb-2020                                                                                                                                                                                                                                                                                                                                                                                                                                                                                                                                                                                                                                                                                                                                                                                                                                                                                                                                                                                                                                                                                                                                                                                                                                                                                                                                                                                                                                                                                                                                                                                                            |
| Complete List of Authors:     | <p>Masse, Marie-Hélène<br/> Battista, Marie-Claude; Université de Sherbrooke, Department of Medicine<br/> Wilcox, M. Elizabeth; University of Toronto, Interdepartmental Division of Critical Care<br/> Pinto, Ruxandra; Sunnybrook Health Sciences Centre<br/> Marinoff, Nicole<br/> D'Aragon, Frédérick; Université de Sherbrooke Faculté de médecine et des sciences de la santé, Anesthesiology; Centre de recherche du CHUS,</p> <p>St-Arnaud, Charles<br/> Mayette, Michael<br/> Leclair, Marc-André<br/> Quiroz Martinez, Hector<br/> Grondin-Beaudoin, Brian<br/> Poulin, Yannick<br/> Carbonneau, Éline<br/> Seely, Andrew; Ottawa Hospital Research Institute<br/> Watpool, Irene<br/> Porteous, Rebecca<br/> Chassé, Michael; Department of Medicine, Université de Montréal<br/> Lebrasseur, Martine<br/> Lauzier, François; Centre de Recherche du CHU de Québec - Université Laval, Population Health and Optimal Health Practices Research Unit (Trauma - Emergency - Critical Care Medicine)<br/> Turgeon, Alexis; Centre de Recherche du Centre Hospitalier Affilié Universitaire de Québec (CHA), Axe Traumatologie-urgence-soins intensifs, CHA-Hôpital de l'Enfant-Jésus, Université Laval, Anesthesia and Critical Care Medicine<br/> Bellemare, David<br/> Mehta, Sangeeta ; University of Toronto<br/> Charbonney, Emmanuel<br/> Belley-Cote, Emilie; McMaster University; Université de Sherbrooke, Medicine<br/> Botton, Édouard<br/> Cohen, Dian<br/> Lamontagne, François; Université de Sherbrooke,<br/> Adhikari, Neill; Sunnybrook Health Sciences Centre and University of Toronto,</p> |

1  
2  
3  
4  
5  
6  
7  
8  
9  
10  
11  
12  
13  
14  
15  
16  
17  
18  
19  
20  
21  
22  
23  
24  
25  
26  
27  
28  
29  
30  
31  
32  
33  
34  
35  
36  
37  
38  
39  
40  
41  
42  
43  
44  
45  
46  
47  
48  
49  
50  
51  
52  
53  
54  
55  
56  
57  
58  
59  
60

|           |                                                                                                   |
|-----------|---------------------------------------------------------------------------------------------------|
| Keywords: | Adult intensive & critical care < ANAESTHETICS, Clinical trials < THERAPEUTICS, MOLECULAR BIOLOGY |
|           |                                                                                                   |

SCHOLARONE™  
Manuscripts

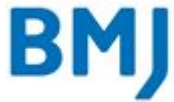

I, the Submitting Author has the right to grant and does grant on behalf of all authors of the Work (as defined in the below author licence), an exclusive licence and/or a non-exclusive licence for contributions from authors who are: i) UK Crown employees; ii) where BMJ has agreed a CC-BY licence shall apply, and/or iii) in accordance with the terms applicable for US Federal Government officers or employees acting as part of their official duties; on a worldwide, perpetual, irrevocable, royalty-free basis to BMJ Publishing Group Ltd ("BMJ") its licensees and where the relevant Journal is co-owned by BMJ to the co-owners of the Journal, to publish the Work in this journal and any other BMJ products and to exploit all rights, as set out in our [licence](#).

The Submitting Author accepts and understands that any supply made under these terms is made by BMJ to the Submitting Author unless you are acting as an employee on behalf of your employer or a postgraduate student of an affiliated institution which is paying any applicable article publishing charge ("APC") for Open Access articles. Where the Submitting Author wishes to make the Work available on an Open Access basis (and intends to pay the relevant APC), the terms of reuse of such Open Access shall be governed by a Creative Commons licence – details of these licences and which [Creative Commons](#) licence will apply to this Work are set out in our licence referred to above.

Other than as permitted in any relevant BMJ Author's Self Archiving Policies, I confirm this Work has not been accepted for publication elsewhere, is not being considered for publication elsewhere and does not duplicate material already published. I confirm all authors consent to publication of this Work and authorise the granting of this licence.

1  
2  
3 Optimal VAsopressor TitratiON in patients 65 years and older (OVATION-65) – protocol  
4 and statistical analysis plan for a randomized clinical trial  
5

6 Marie-Hélène Masse, Marie-Claude Battista, M. Elizabeth Wilcox, Ruxandra Pinto, Nicole  
7 Marinoff, Frédérick D’Aragon, Charles St-Arnaud, Michael Mayette, Marc-André Leclair,  
8 Hector Quiroz Martinez, Brian Grondin-Beaudoin, Yannick Poulin, Éleine Carbonneau,  
9 Andrew JE Seely, Irene Watpool, Rebecca Porteous, Michaël Chassé, Martine Lebrasseur,  
10 François Lauzier, Alexis Turgeon, David Bellemare, Sangeeta Mehta, Emmanuel  
11 Charbonney, Émilie Belley-Côté, Édouard Botton, Dian Cohen, François Lamontagne\*†,  
12 Neill KJ Adhikari\*†, on behalf of the Canadian Critical Care Trials Group  
13  
14

15  
16 Masse: Centre de Recherche du Centre Hospitalier Universitaire de Sherbrooke, Sherbrooke, QC,  
17 Canada (marie-helene.masse3@usherbrooke.ca)

18 Battista: Centre de Recherche du Centre Hospitalier Universitaire de Sherbrooke and Université de  
19 Sherbrooke, Sherbrooke, QC, Canada (marie-claude.battista@usherbrooke.ca)

20 Wilcox: Department of Medicine, University Health Network, and Interdepartmental Division of  
21 Critical Care Medicine, University of Toronto, Toronto, ON, Canada (elizabeth.wilcox@utoronto.ca)

22 Pinto: Department of Critical Care Medicine, Sunnybrook Health Sciences Centre, Toronto, ON,  
23 Canada (ruxandra.pinto@sunnybrook.ca)

24 Marinoff: Department of Critical Care Medicine, Sunnybrook Health Sciences Centre, Toronto, ON,  
25 Canada (nicole.marinoff@sunnybrook.ca)

26 D’Aragon: Centre de Recherche du Centre Hospitalier Universitaire de Sherbrooke and Université de  
27 Sherbrooke, Sherbrooke, QC, Canada (frederick.daragon@usherbrooke.ca)

28 St-Arnaud: Centre de Recherche du Centre Hospitalier Universitaire de Sherbrooke and Université de  
29 Sherbrooke, Sherbrooke, QC, Canada (Charles.St-Arnaud@USherbrooke.ca)

30 Mayette: Centre de Recherche du Centre Hospitalier Universitaire de Sherbrooke and Université de  
31 Sherbrooke, Sherbrooke, QC, Canada (michael.mayette@usherbrooke.ca)

32 Leclair: Université de Sherbrooke, Sherbrooke, QC, Canada (Marc-Andre.Leclair@USherbrooke.ca)

33 Quiroz Martinez: Université de Sherbrooke, Sherbrooke, QC, Canada  
34 (Hector.Quiroz.Martinez@USherbrooke.ca)

35 Grondin-Beaudoin: Université de Sherbrooke, Sherbrooke, QC, Canada  
36 (Brian.Grondin.Beaudoin@USherbrooke.ca)

37 Poulin: Université de Sherbrooke, Sherbrooke, QC, Canada (yannick.poulin@usherbrooke.ca)

38 Carbonneau: Centre de Recherche du Centre Hospitalier Universitaire de Sherbrooke, Sherbrooke,  
39 QC, Canada (elaine.carbonneau.ciussse-chus@ssss.gouv.qc.ca)

40 Seely: Departments of Surgery and Critical Care Medicine, University of Ottawa, Ottawa Hospital  
41 Research Institute, Ottawa, ON, Canada (aseely@toh.ca)

42 Watpool: Ottawa Hospital Research Institute, Ottawa, ON, Canada (iwatpool@toh.ca)

43 Porteous: Ottawa Hospital Research Institute, Ottawa, ON, Canada (rporteous@ohri.ca)

44 Chassé: Centre de Recherche du Centre Hospitalier de l’Université de Montréal, Montréal, QC,  
45 Canada (michael.chasse@umontreal.ca)

46 Lebrasseur: Centre de Recherche du Centre Hospitalier Universitaire de Montréal, Montréal, QC,  
47 Canada (martine.lebrasseur.chum@ssss.gouv.qc.ca)

48 Lauzier: Centre de recherche du CHU de Québec-Université Laval, Population Health and Optimal  
49 Health Practice Research Unit, Québec, QC, Canada (francois.lauzier@fmed.ulaval.ca)

50 Turgeon: Centre de recherche du CHU de Québec-Université Laval, Population Health and Optimal  
51 Health Practice Research Unit, Québec, QC, Canada (alexis.turgeon@fmed.ulaval.ca)

52 Bellemare: Centre de recherche du CHU de Québec-Université Laval, Population Health and Optimal  
53 Health Practice Research Unit, Québec, QC, Canada (david.bellemare@crchudequebec.ulaval.ca)

54 Mehta: Department of Medicine, Sinai Health System, and Interdepartmental Division of Critical Care  
55 Medicine, University of Toronto, Toronto, ON, Canada (geeta.mehta@sinaihealth.ca)  
56  
57  
58  
59  
60

1  
2  
3 Charbonney: Centre de Recherche du Centre Hospitalier Universitaire de Montréal, Montréal, QC,  
4 Canada (emmanuel.chabonney@umontreal.ca)

5 Belley-Côté: Division of Cardiology, Department of Medicine, McMaster University, Population  
6 Health Research Institute, Hamilton, ON, Canada (emilie.belley-cote@phri.ca)

7 Botton: no institutional affiliation, Sherbrooke, QC, Canada (edbotton@hotmail.com)

8 Cohen: no institutional affiliation, Sherbrooke, QC, Canada (hey.dian@gmail.com)

9 Lamontagne: Centre de Recherche du Centre Hospitalier Universitaire de Sherbrooke and Université  
10 de Sherbrooke, Sherbrooke, QC, Canada (francois.lamontagne@usherbrooke.ca)

11 Adhikari: Department of Critical Care Medicine, Sunnybrook Health Sciences Centre, Toronto, ON,  
12 Canada and Interdepartmental Division of Critical Care Medicine and Institute for Health Policy,  
13 Management, and Evaluation, University of Toronto, Toronto, ON, Canada  
14 (neill.adhikari@utoronto.ca)

15  
16  
17 \* correspondence: neill.adhikari@utoronto.ca; francois.lamontagne@usherbrooke.ca

18 † contributed equally and co-senior authors

19 OVATION-65 team members, including research personnel at clinical sites active at the time of  
20 submission of this manuscript, are listed in online supplementary file S1.  
21  
22  
23  
24  
25  
26  
27  
28  
29  
30  
31  
32  
33  
34  
35  
36  
37  
38  
39  
40  
41  
42  
43  
44  
45  
46  
47  
48  
49  
50  
51  
52  
53  
54  
55  
56  
57  
58  
59  
60

**Abstract**

**Introduction:** Vasodilatory hypotension is common among intensive care unit (ICU) patients, and vasopressors are considered standard of care. However, optimal mean arterial pressure [MAP] targets for vasopressor titration are unknown. The objective of OVATION-65 (Optimal Vasopressor Titration-65) is to ascertain the effect of permissive hypotension (vasopressor titration to achieve MAP 60-65 mmHg) vs. usual care in hypotensive patients  $\geq 65$  years old.

**Methods and analysis:** OVATION-65 is an allocation-concealed randomized trial in ICUs in 7 Canadian hospitals. Eligible patients are  $\geq 65$  years old, in an ICU with vasodilatory hypotension, receiving vasopressors for  $\leq 12$  hours to maintain MAP  $\geq 65$  mmHg during or after adequate fluid resuscitation, and expected to receive vasopressors for  $\geq 6$  additional hours. Patients are excluded for any of the following: active treatment for spinal cord or acute brain injury; vasopressors given solely for bleeding, ventricular failure or post-cardiopulmonary bypass vasoplegia; withdrawal of life-sustaining treatments expected within 48 hours; death perceived as imminent; previous enrolment in OVATION-65; organ transplant within the last year; receiving extracorporeal life support; or lack of physician equipoise. Patients are randomized to permissive hypotension vs. usual care for up to 28 days. The primary outcome is high-sensitivity troponin T, a biomarker of cardiac injury. Secondary outcomes include biomarkers of injury to other organs (brain, liver, intestine, and skeletal muscle); lactate (a biomarker of global tissue dysoxia); resource utilization; adverse events; mortality (90 days and 6 months); and cognitive function (6 months). Assessors of biomarkers, mortality, and cognitive function are blinded to allocation.

**Ethics and dissemination:** This protocol has been approved at all participating sites. Consent is obtained from the eligible patient, the substitute decision-maker if the patient is incapable, or in a deferred fashion where permitted. Plans for end-of-grant dissemination include

1  
2  
3 conference presentations, journal publications, and social media platforms and discussion  
4  
5 forums.  
6

7  
8 **Trial registration:** [clinicaltrials.gov](http://clinicaltrials.gov), NCT03431181  
9

10  
11  
12 **Keywords**  
13

14 vasopressors; shock; critical care; biomarkers; randomized controlled trial  
15  
16  
17  
18  
19  
20  
21  
22  
23  
24  
25  
26  
27  
28  
29  
30  
31  
32  
33  
34  
35  
36  
37  
38  
39  
40  
41  
42  
43  
44  
45  
46  
47  
48  
49  
50  
51  
52  
53  
54  
55  
56  
57  
58  
59  
60



## Article summary

### Strengths and limitations of this study

- OVATION-65 is an allocation-concealed randomized clinical trial of permissive hypotension vs. usual care in patients 65 years and older with hypotension from a vasodilatory cause, a population that may be more vulnerable to adverse effects of vasopressors
- Vasopressor titration is understudied in critically ill patients, compared to other interventions such as mechanical ventilation
- The primary and many secondary outcomes, selected with input from a patient representative, focus on biomarkers of organ injury; although these are not patient-centred outcomes, results will complement clinical outcome data from larger trials
- Because of the nature of the intervention, blinding is not feasible; however, outcome assessors are blinded
- The modest sample size implies that the trial is underpowered for clinical outcomes

## Introduction

Shock, a clinical syndrome of which hypotension is a cardinal feature, is common and associated with high mortality. Vasopressors are used to treat hypotension that is potentially life-threatening because they raise blood pressure by inducing vasoconstriction.<sup>1</sup> However, these medications are associated with adverse effects,<sup>2-4</sup> some of which are direct consequences of vasoconstriction-induced reduction in blood flow to vital organs. Therefore, titrating vasopressors implies balancing the risks of end-organ failure caused by hypotension and potential vasopressor-induced harm, including myocardial injury and arrhythmia, excessive vasoconstriction, hyperglycemia, and immunosuppression.<sup>2-5</sup> Permissive hypotension is a strategy of targeting a lower blood pressure when prescribing vasopressors, compared to usual care. Benefits have been associated with other 'permissive' therapies in critically ill patients, including hypoxia,<sup>6</sup> underfeeding,<sup>7</sup> hypercapnia,<sup>8</sup> red blood cell transfusion,<sup>9</sup> and hypotension in thoracic penetrating trauma.<sup>10</sup>

Clinicians in the intensive care unit (ICU) use mean arterial pressure (MAP) targets to determine the intensity of vasopressor therapy. Current international practice guidelines recommend titrating vasopressors to a MAP of 65 mmHg or more.<sup>11</sup> Because the target lacks an upper boundary, clinicians commonly put more emphasis on preventing hypotension than on minimizing vasopressor exposure. This under-appreciation of the risks associated with vasopressor overuse was apparent in a multicentre observational study<sup>12</sup> that reported an average MAP of 75 (standard deviation [SD] 6) mmHg in patients receiving vasopressors, approximately 10 mmHg above the recommended MAP and self-reported practice.<sup>13</sup> Given the relative lack of studies about vasopressor dosing, in contrast to other common ICU treatments such as mechanical ventilation, editorialists have advocated for better characterization of the lowest acceptable blood pressure target to avoid vasopressor-induced harm.<sup>3</sup>

### *Existing evidence*

Observational studies have described independent associations between dose and duration of vasopressor therapy and poor outcomes, such as adverse cardiac events and increased mortality.<sup>14 15</sup> However, these studies are limited by indication bias, as patients who are sicker have a greater risk of unfavourable outcomes and are therefore more likely to be exposed to higher doses of vasopressor therapy.

Two randomized clinical trials (RCTs; combined n=894) published prior to the initiation of this study compared blood pressure targets in patients receiving vasopressors.<sup>16 17</sup> The SEPSISPAM trial compared a MAP target of 65-70 mmHg vs. 80-85 mmHg for 5 days in 776 patients with septic shock from 29 French ICUs. This study reported no difference in 28-day mortality (lower MAP 34.0% vs. higher MAP 36.6%, p=0.57), but a greater risk of atrial fibrillation in the higher MAP arm (6.7% versus 2.8%, p=0.02).<sup>16</sup> However, actual MAP values were 74-76 mmHg in the lower MAP arm, precluding conclusions regarding permissive hypotension. The OVATION pilot feasibility trial randomly assigned 118 patients from 1 US and 10 Canadian ICUs to a lower (60-65 mmHg) or higher (75-80 mmHg) MAP target<sup>17</sup>. This trial was not powered to detect differences in mortality. A subsequent individual patient data meta-analysis (IPDMA)<sup>18</sup> included data from both RCTs and found that higher MAP targets (75-85 mmHg) may be associated with an increased risk of 28-day mortality in older patients (p=0.1 for interaction between age and MAP).

Based on these RCTs, guidelines state that no evidence supports the use of MAP targets >65 mmHg for patients receiving vasopressors.<sup>19</sup> Subsequently, the 65 trial randomized 2600 patients ≥65 years old in the United Kingdom to permissive hypotension vs. usual care using the same protocol as OVATION-65.<sup>20 21</sup> Patients in the permissive hypotension arm had a

1  
2  
3 lower exposure to vasopressors and a lower 90-day mortality (41.0% vs. 43.8%,  $p=0.15$ ), but  
4  
5 the difference was not statistically significant. However, the analysis adjusting for baseline  
6  
7 covariates found lower mortality with permissive hypotension (OR 0.82, 95%CI 0.68-0.98).<sup>22</sup>  
8  
9  
10 The 65 trial collected no biological samples, precluding exploration of mechanisms  
11  
12 underlying the clinical effect of vasopressor dosing.  
13  
14  
15  
16

### 17 *Goal and Objectives*

18  
19 The goal of OVATION-65 is to determine whether permissive hypotension (MAP 60-  
20  
21 65 mmHg) in patients  $\geq 65$  years old ( $n=200$ ) with a vasodilatory cause of hypotension and  
22  
23 receiving vasopressors, compared to usual MAP targets, reduces harm. Specific objectives are  
24  
25 to ascertain the effect of permissive hypotension vs. usual care on: 1) biomarkers of organ  
26  
27 injury (heart [primary outcome], brain, liver, intestine, skeletal muscle); 2) biomarker of  
28  
29 global tissue dysoxia (lactate); 3) organ function (assessed by Sequential Organ Failure  
30  
31 Assessment [SOFA] score<sup>23</sup>); 4) resource utilization, 5) prespecified adverse events, 6)  
32  
33 mortality at 90 days and 6 months; 7) cognitive impairment in survivors at 6 months (Table  
34  
35 1).  
36  
37  
38  
39

40 The primary outcome and several secondary outcomes are focused on biomarkers  
41  
42 because of well-documented limitations of mortality in critical care trials<sup>24</sup> and the challenges  
43  
44 of developing valid surrogate endpoints.<sup>25</sup> OVATION-65 was designed to be complementary  
45  
46 to the 65 trial.<sup>22</sup> A larger version of OVATION-65 ( $n=800$ ) was abandoned in 2018 after  
47  
48 repeated funding applications to the Canadian Institutes for Health Research and the Canadian  
49  
50 Frailty Network were rejected.  
51  
52  
53  
54  
55

### 56 **Methods and analysis**

57  
58  
59  
60

1  
2  
3 OVATION-65 is a multicentre, parallel-group, allocation-concealed, superiority RCT.  
4  
5 We developed OVATION-65 on behalf of the Canadian Critical Care Trials Group (CCCTG),  
6  
7 a 350-member organization of clinicians and researchers, incorporating feedback received  
8  
9 since January 2012 at each of its thrice yearly scientific meetings. Table 2 shows a timeline of  
10  
11 trial activities. The SPIRIT checklist is available in online supplementary file S2.  
12  
13  
14  
15  
16

### 17 *Study setting and management*

18  
19 OVATION-65 is conducted in adult ICUs in 7 sites in Canada. The procedures in  
20  
21 place for OVATION-65 were piloted during the OVATION pilot RCT.<sup>17</sup> The Unité de  
22  
23 Recherche Clinique et Épidémiologique (URCE) is coordinating this trial and is responsible  
24  
25 for construction and maintenance of the randomization system and the REDCap<sup>26,27</sup> electronic  
26  
27 data capture (EDC) system. The URCE also oversees the activities of the OVATION-65 core  
28  
29 laboratory (i.e. storage and analysis of blood and urine samples).  
30  
31  
32  
33  
34

### 35 *Inclusion criteria*

36  
37 Patients are included if they meet all the following criteria: 1) age  $\geq 65$  years; 2)  
38  
39 diagnosis of vasodilatory hypotension as assessed by the treating team; 3) vasopressors  
40  
41 started  $\leq 12$  hours (after/during adequate fluid resuscitation, as assessed by treating physician);  
42  
43 and 4) vasopressors expected for  $\geq 6$  additional hours as assessed by the treating team.  
44  
45  
46  
47  
48

### 49 *Exclusion criteria*

50  
51 Patients are excluded if they meet any of the following criteria: 1) actively treated for  
52  
53 spinal cord injury or acute brain injury; 2) vasopressors given solely for bleeding, acute  
54  
55 ventricular failure or post-cardiopulmonary bypass vasoplegia; 3) lacking commitment to life-  
56  
57  
58  
59  
60

1  
2  
3 sustaining therapies (expected withdrawal of life-sustaining treatments within the next 48  
4 hours); 4) death perceived as imminent; 5) previously enrolled in OVATION-65; 6) organ  
5  
6 transplant within the last year; 7) receiving extracorporeal life support at baseline; and 8) lack  
7  
8 of treating physician equipoise regarding the overall effects of permissive hypotension vs.  
9  
10 usual care on patient important outcomes.  
11  
12  
13  
14  
15  
16

### 17 *Rationale for eligibility criteria*

18  
19 The inclusion criteria strive to identify patients most likely to benefit from permissive  
20 hypotension, namely elderly patients not already exposed to a prolonged duration of higher  
21 MAP but expected to require an additional period of vasopressor therapy. The exclusion  
22 criteria are designed to exclude patients for whom clinicians commonly apply different MAP  
23 targets (criterion 1) or whose prognosis may be dominated by factors other than the MAP  
24 target (criteria 2, 3, 4, 6, 7).  
25  
26  
27  
28  
29  
30  
31  
32  
33  
34

### 35 *Study intervention*

#### 36 Treatment allocation

37  
38 Using a web randomization service available 24 hours/7 days per week, patients are  
39 randomized immediately after confirming eligibility following a 1:1 sequence to permissive  
40 hypotension or usual care. We use permuted blocks of variable and undisclosed size (4, 6 and  
41 8) and stratify randomization by site. Stratifying by site ensures equal distribution of patients  
42 between arms at each site and decreases the probability that site-specific practices confounds  
43 treatment effects.  
44  
45  
46  
47  
48  
49  
50  
51  
52  
53  
54

#### 55 Permissive hypotension arm

1  
2  
3 The intervention minimizes dose and duration of vasopressors. Treating teams adjust  
4 vasopressors to a target MAP range of 60 to 65 mmHg. A MAP of 60 mmHg was selected as  
5 lowest tolerable limit because it corresponds to the threshold at which Canadian intensivists  
6 usually initiate vasopressors.<sup>13</sup> Accordingly, it is not uncommon for patients to have MAP as  
7 low as 60 mmHg before vasopressors are instituted under usual care. Moreover, coronary  
8 perfusion pressure and glomerular filtration rate are both believed to be stable above 60  
9 mmHg. Lastly, the same MAP range was used in the OVATION pilot RCT<sup>17</sup>

10  
11  
12  
13  
14  
15  
16  
17  
18  
19 The duration of the trial intervention is determined, as it was in the pilot RCT, by the  
20 duration of the hypotensive episode, up to a maximum of 28 days. For trial purposes, the  
21 episode of hypotension ends when vasopressors are discontinued for 24 consecutive hours. As  
22 soon as patients are able to maintain the target MAP without vasopressors, the infusions are  
23 stopped. If MAP drops below 60 mmHg after this 24-hour period, and if the treating team  
24 determines that vasopressors should be reinstated, they are titrated to the allocated target of  
25 60 to 65 mmHg. If patients are discharged and then readmitted to the ICU, vasopressor  
26 therapy is left at the discretion of the treating team.

#### 27 28 29 30 31 32 33 34 35 36 37 38 39 40 Usual care arm

41  
42 Patients in the control arm receive usual care, as per local practice. This constitutes an  
43 improvement to the protocol of the OVATION pilot trial, which imposed a higher target MAP  
44 range of 75 to 80 mmHg. Given preliminary evidence suggesting that this higher MAP target  
45 may increase risk of death in older patients, we believe that mandating a higher MAP would  
46 be ethically questionable. By comparing permissive hypotension to usual care, we improve  
47 acceptance from clinicians and reduce the risk that the control group will diverge widely from  
48 usual care.<sup>28</sup> Risks of contamination are negligible given observational data showing that  
49 MAP values of patients treated with vasopressors are much higher than the currently  
50  
51  
52  
53  
54  
55  
56  
57  
58  
59  
60

1  
2  
3 recommended target of 65 mmHg. Moreover, changing the behaviour of physicians and  
4  
5 nurses is challenging even when there is consensus on the benefit of a new intervention,<sup>29</sup> and  
6  
7 such a consensus does not exist for permissive hypotension.<sup>30</sup> To further decrease the risk of  
8  
9 contamination (i.e. lack of separation of MAP between arms), we monitor separation of actual  
10  
11 MAP between study arms and communicate regularly with sites.  
12  
13  
14  
15  
16

### 17 Selection of vasopressors

18  
19 We do not mandate the use of any specific vasopressor or combination of vasopressors.  
20  
21 In OVATION-65, the term 'vasopressor' refers to the following medications given by  
22  
23 infusion: norepinephrine, epinephrine, dopamine, phenylephrine, and vasopressin. In patients  
24  
25 receiving multiple vasopressors, we calculate the total vasopressor dose as norepinephrine  
26  
27 equivalent as previously reported.<sup>31</sup> In addition, we collect information on orally  
28  
29 administered catecholaminergic medications (i.e., midodrine and ephedrine).  
30  
31  
32  
33  
34

### 35 Other interventions

36  
37 As per usual care of patients receiving vasopressors, central venous catheters (to avoid  
38  
39 extravasation) and arterial catheters (for close MAP monitoring) are in place. Exceptions do  
40  
41 not constitute deviations, consistent with a pragmatic study design. Use of pure inotropes,  
42  
43 intravenous fluids, and corticosteroids are recorded but left to the discretion of the treating  
44  
45 team.  
46  
47  
48  
49  
50

### 51 *Outcomes*

#### 52 Primary outcome

53  
54  
55 The primary outcome of OVATION-65 is high-sensitivity cardiac troponin T (hsTnT)  
56  
57 at day 3; baseline samples (day 1) are collected before assignment to the intervention but after  
58  
59  
60



1  
2  
3 vasopressors have started. Cardiac troponins are consistently associated with worse outcomes  
4  
5 in critical illness<sup>32-36</sup>, and cardiac biomarkers may be modifiable by administration of  
6  
7 albumin<sup>33</sup> and medications.<sup>34</sup> Given that coronary perfusion autoregulation is maintained  
8  
9 when MAP is at least 60 mmHg, we hypothesize that increasing vasopressors to achieve a  
10  
11 higher MAP offers no advantage but increases the severity of demand-related myocardial  
12  
13 ischemia via increased heart rate (i.e. reduced coronary perfusion time) and transmural  
14  
15 pressure (i.e. afterload). If OVATION-65 shows that permissive hypotension prevents or  
16  
17 limits hsTnT elevation, then patients at increased risk of secondary myocardial ischemia,  
18  
19 possibly identified by baseline hsTnT, may benefit the most from this strategy. Similarly, this  
20  
21 biomarker could be used to identify vasopressor-induced harm earlier and modify vasopressor  
22  
23 use accordingly.  
24  
25  
26  
27  
28  
29  
30

### 31 Secondary outcomes

32  
33 Secondary outcomes include high-sensitivity cardiac troponin T (hs TnT) at day 7;  
34  
35 biomarkers associated with cardiac wall stress (plasma N-terminal pro-B-type natriuretic  
36  
37 peptide [NT-proBNP]<sup>33</sup>); tissue injury to the brain<sup>37</sup> (glial fibrillary acidic protein [GFAP]<sup>38</sup>,  
38  
39 ubiquitin C-terminal hydrolase L1 [UCHL1]<sup>39</sup>, myelin basic protein [MBP]<sup>40</sup>, neuron-specific  
40  
41 enolase [NSE]<sup>41</sup>), liver (serum alanine aminotransferase [ALT]<sup>42</sup>), intestine (plasma  
42  
43 intestinal-type fatty acid binding protein [FABP2]<sup>43</sup>), skeletal muscle (plasma creatine kinase,  
44  
45 muscular [CKM]<sup>44</sup>); and global tissue dysoxia (plasma lactate). As for hsTnT, all biomarker  
46  
47 outcomes are measured at baseline, day 3 and 7.  
48  
49  
50

51 We measure secondary clinical outcomes, including organ function using SOFA score  
52  
53 (on days 1, 2, 3, 4, 7, 10, 14 and 28 while in the ICU). We describe healthcare utilization in  
54  
55 terms of duration of mechanical ventilation, renal replacement therapy, vasopressor therapy,  
56  
57 ICU and hospital stay. We report the incidence of the prespecified adverse events of stroke,  
58  
59  
60

1  
2  
3 acute kidney injury (KDIGO stage 3),<sup>45</sup> clinically detected supraventricular arrhythmia,<sup>5 46</sup>  
4  
5 and limb or intestinal ischemia as defined in the OVATION pilot trial.<sup>17</sup> Investigators will  
6  
7 adjudicate these adverse events using medical records, if necessary. We ascertain mortality at  
8  
9 90 days and 6 months. For 6-month survivors, we assess cognition using the Telephone  
10  
11 Interview for Cognitive Status (TICS), a validated questionnaire used in ICU cohorts.<sup>47</sup>  
12  
13  
14  
15  
16

### 17 *Adverse events*

18  
19 OVATION-65 is testing a common intervention to treat a common problem in  
20  
21 critically ill patients. All eligible patients are at risk of adverse events due to their underlying  
22  
23 critical illness. Following Canadian guidelines for serious adverse event (SAE) reporting in  
24  
25 academic drug trials in critical care,<sup>48</sup> expected SAEs (stroke, KDIGO stage 3 acute kidney  
26  
27 injury, clinically detected supraventricular arrhythmia, limb or intestinal ischemia, death) are  
28  
29 already incorporated as trial outcomes, defined *a priori*. SAEs are limited to events not  
30  
31 already labelled as trial outcomes and that might reasonably occur as a consequence of the  
32  
33 trial interventions. SAEs must be reported in the participant's medical notes, on the  
34  
35 OVATION-65 dedicated case report form and to the coordinating centre within 24 hours of  
36  
37 observing or learning of the event. Such events are promptly discussed with the Data and  
38  
39 Safety Monitoring Committee (DSMC).  
40  
41  
42  
43  
44  
45  
46

### 47 Data collection

48  
49 We collect the following data: 1) Baseline data (day 1) – demographics, admitting  
50  
51 diagnosis, etiology of hypotension, severity of illness (APACHE II score<sup>49</sup>), organ  
52  
53 dysfunction (SOFA score<sup>23</sup>), comorbidities (including chronic hypertension, coronary,  
54  
55 cerebral, or peripheral vascular disease, congestive heart failure, chronic kidney disease,  
56  
57 severe cognitive impairment, Clinical Frailty Scale<sup>50</sup>, co-enrolment in other prospective  
58  
59  
60

1  
2  
3 observational studies or RCTs; 2) relevant co-interventions (fluid balance, inotropes, and  
4 corticosteroids); 3) protocol adherence (MAP while receiving vasopressors and corresponding  
5 vasopressor dose modification); and 4) primary and secondary outcomes.  
6  
7  
8  
9

### 10 11 12 Study Samples

13  
14 To minimize the treating teams' workload, study samples (blood and urine) coincide as  
15 much as possible with clinical sampling on day 1 (baseline) and on day 3 and 7 (or the day of  
16 ICU discharge or before anticipated death or withdrawal of life-sustaining therapies,  
17 whichever comes first).  
18  
19  
20  
21  
22

23  
24 To ensure consistent measurement of biomarkers, the study samples are processed on  
25 site and shipped to URCE, where they are stored at -80°C and batched for analyses at the end  
26 of the trial. Clinical teams are blinded to the results of the biomarker assays but are free to  
27 measure any desired biomarker via local hospital laboratory. Participants are also approached  
28 for participation in a parallel Acute Care Biobank, via a separate consent form, which allows  
29 samples remaining following completion of OVATION-65 specified analyses to be stored for  
30 future projects.  
31  
32  
33  
34  
35  
36  
37  
38  
39  
40  
41

### 42 Reducing bias

43  
44 Risk of bias is reduced by concealed randomization using variable and undisclosed  
45 blocks. Assessors of biomarkers, pre-specified adverse events, mortality, and TICS are  
46 blinded to treatment allocation. Specimen processing and analysis are standardized as  
47 described. Finally, we record co-interventions to detect performance bias.  
48  
49  
50  
51  
52  
53  
54  
55

### 56 Protocol adherence in the permissive hypotension arm

1  
2  
3 Adherence is defined as appropriately reducing vasopressor doses (or discontinuing  
4 vasopressors) when the MAP is above 65 mm Hg. Protocol deviations are defined as a failure  
5 to reduce (or discontinue) vasopressors while the MAP is above 65 mm Hg for three  
6 consecutive hours. Investigators will adjudicate at least 10% of deviations using source data if  
7 required.  
8  
9

10  
11  
12 For each day on protocol, we record the MAP value recorded nearest to each hour. In  
13 the intervention arm, clinical teams are reminded to consider discontinuing vasopressor  
14 therapy if the patients are able to maintain MAP values of at least 60 mmHg. Every  
15 participating site receives on-site training, to which all ICU bedside staff are invited. We  
16 distribute standard operating procedures and protocol adherence reports generated from MAP  
17 and vasopressor data entered in the electronic case report form. Regular newsletters and trial  
18 website updates (<https://www.ccctg.ca/Programs/OVATION65.aspx>) keep participating sites  
19 informed of study progress, overall adherence, and answers to frequently asked questions.  
20 Research staff are available 24/7.  
21  
22  
23  
24  
25  
26  
27  
28  
29  
30  
31  
32  
33  
34

35 We report the number of protocol deviations and the number of patients with any  
36 protocol deviation in the permissive hypotension arm.  
37  
38  
39  
40  
41

#### 42 Follow-up

43  
44 Participants are followed to hospital discharge by local research teams. Either the  
45 coordinating centre or the enrolling site ascertains 90-day and 6-month mortality and 6-month  
46 cognitive status in survivors by telephone. Prior verification of known vital status with local  
47 research teams and calibrated telephone scripts mitigate the risk of emotional distress in the  
48 event that the patients have died since hospital discharge. We selected TICS to measure  
49 cognitive function in survivors because telephone administration reduces risk of bias,  
50 improves measurement consistency, reduces patient burden, and enhances feasibility.  
51  
52  
53  
54  
55  
56  
57  
58  
59  
60

## Patient and public involvement

The protocol was developed with input from ICU survivors, who advised on the selection of outcomes.

## *Statistical analysis*

### Sample size

OVATION-65 is supported by several modest operating grants, each of which required a distinct objective, sample size calculation and analysis plan. By combining funds from multiple sources, we had planned to enrol 200 participants, which provides 80% power to detect an effect size of 0.4 in the difference between day 3 hsTnT in the permissive hypotension group compared to usual care, where 0.5 is considered to be medium.<sup>51</sup> However, the OVATION-65 Executive Committee forwarded the 65 trial publication<sup>22</sup> to the DSMC, which requested a meeting to discuss the results. The DSMC subsequently issued a letter on 21 February 2020 recommending termination of enrolment in OVATION-65. The DSMC ‘reasoned that in light of the accumulated evidence, mostly from the 65 trial<sup>22</sup> but also with some consideration of SEPSISPAM,<sup>16</sup> the posterior probability of lower MAP targets now being better was sufficiently high that there is no longer equipoise between the interventions being compared in OVATION-65. As of 21 February 2020, 159 patients had been randomized.

We lack resources to measure every outcome in each participant. Outcomes not measured on every participant and those that were planned originally but that remain unfunded are described in online supplementary file S4 and will be reported separately.

### Patient flow

1  
2  
3 A sample CONSORT diagram is presented in Figure 1.  
4  
5  
6

### 7 Data analysis

8  
9  
10 Analyses will be performed after all follow-up is completed, data queries are resolved,  
11 and the database is locked. We will adhere to the intention-to-treat principle, and data from  
12 participants will be analyzed by allocated group, regardless of protocol adherence. All  
13 participant data will be analysed unless consent to retain data is withdrawn. Statistical testing  
14 will use a superiority framework, with  $p < 0.05$  interpreted as statistically significant. Estimates  
15 of effect will be reported with 95% confidence intervals. No adjustments for multiplicity will  
16 be made. All analyses will use SAS 9.4 (Cary, USA). Given the modest sample size and focus  
17 on biomarkers of organ injury, no interim analysis is planned. Continuous data will be  
18 summarised as means (SD) if normally distributed and as medians (Q1, Q3) otherwise.  
19 Categorical data will be summarised as frequencies and proportions. Baseline data will be  
20 summarised as shown in Table 3.  
21  
22  
23  
24  
25  
26  
27  
28  
29  
30  
31  
32  
33  
34

35 The primary outcome of day 3 hsTnT will be analysed, adjusting for the day 1 value. We  
36 will use the original scale and analysis of covariance if the data are not skewed; if skewed we  
37 will log-transform and use robust regression to obtain more interpretable estimates. We will  
38 use pooled logistic regression to estimate the probabilities of missing values due to either  
39 death or live discharge from the ICU. Based on these models, we will compute the inverse-  
40 probability of attrition weights for each observation and use generalized estimating equation  
41 models to test the differences in hs TnT between the permissive hypotension and usual care  
42 arm,<sup>52</sup> adjusting for centre using fixed effects. As a sensitivity analysis, for patients that die  
43 before day 3, we will impute the worst (highest) value and for patients discharged alive before  
44 day 3, we will impute the best (lowest) value.  
45  
46  
47  
48  
49  
50  
51  
52  
53  
54  
55  
56  
57  
58  
59  
60

1  
2  
3 For the secondary outcome of day 7 hsTnT, we will use the same approach. For patients  
4 who die before day 7, we will impute the worst (highest) value. For patients discharged alive  
5 before day 7, we will impute based on data available for other patients alive at day 7. The  
6 approach for all other biomarkers will be the same as for hsTnT.  
7  
8  
9  
10

11  
12 For SOFA over the first 7 days, we will use a linear mixed effects model to account for  
13 repeated measures within patients as well as the centre effect. For patients who die before day  
14 7, we will impute the worst (highest) value. For patients discharged alive before day 7, we  
15 will impute based on data available for patients in the same group alive at day 7. We will look  
16 for interaction between time and group as well as time trends. For TICS, we will use ordinal  
17 logistic regression with fixed effect for centre to compare the distribution of patients at 6  
18 months in 4 categories (death and 3 cognitive status categories [non-impaired, mild  
19 impairment, and moderate-severe impairment]). If proportional odds assumption does not  
20 hold, we will use multinomial regression to compare the two groups. If there is >5% loss to  
21 follow-up for TICS, we will conduct sensitivity analyses using multiple imputation  
22 techniques for the missing values. We will also report the proportion of patients in each  
23 category by arm and test for differences in separate categories of mortality and cognitive  
24 impairment. For mortality, we will use a generalized linear mixed effect model with logit link  
25 for 90 and 365 days separately. For prespecified adverse events, we will report the proportion  
26 of patients in each arm with the outcome and test for differences using chi-square test or  
27 Fisher's exact test, as appropriate.  
28  
29  
30  
31  
32  
33  
34  
35  
36  
37  
38  
39  
40  
41  
42  
43  
44  
45  
46  
47

48 In sensitivity analyses, we will also adjust for prespecified baseline covariates: APACHE  
49 II, total dose of vasopressor administration before randomization (in norepinephrine  
50 equivalents),<sup>53</sup> and history of hypertension, or coronary artery disease (angina, myocardial  
51 infarction [MI], or coronary revascularisation).  
52  
53  
54  
55  
56  
57

58 No subgroup analyses are prespecified due to the small sample size.  
59  
60

### *Registration*

The trial was registered on [www.clinicaltrials.gov](http://www.clinicaltrials.gov) on 13 February 2018 (NCT03431181).

### *Data management*

The paper or electronic case report forms (CRFs) are the primary data collection tool for the study. All data requested on the CRF are recorded on paper CRFs or on the electronic CRFs within the secure REDCap EDC system. If the data are first collected on paper CRFs, site research personnel subsequently transfer all data into REDCap by direct entry.

### *Monitoring*

Quality control measures include 1) site training of research and clinical personnel on eligibility assessment, trial procedures, and data collection; 2) standard operating procedures to guide processing, storage, and shipping of blood and urine samples; 3) ongoing assessment of trial management metrics (monthly screening logs, monthly reports (site enrolment, protocol adherence in the permissive hypotension arm and regarding study samples), and periodic feedback to the clinical sites on performance (recruitment, protocol adherence), with benchmarking from other sites; 4) ongoing review of missing data and outliers; and 5) rapid dissemination of responses to frequently asked questions via our study website and monthly newsletter. For one site, we also conducted monitoring visits for 2 of the first 5 participants and 10% of the subsequent participants. Coordinating Centre staff and the Principal Investigators were available at all times to answer study-related questions.



### *Trial oversight*

#### Executive Committee

The Executive Committee is comprised of Neill KJ Adhikari, M Elizabeth Wilcox, and François Lamontagne (co-principal investigators), Marie-Claude Battista (core laboratory), and Marie-Hélène Masse (project leader). The Executive Committee is responsible for day-to-day management.

#### Data Safety Monitoring Committee

The DSMC is independent of the study investigators and responsible for safeguarding the interests of study participants, assessing the safety and efficacy of study procedures, and monitoring the overall conduct of the study. DSMC members have extensive trial experience and include a senior methodologist who has served as Chair on numerous DSMCs for international RCTs, a senior biostatistician, and a clinician scientist in intensive care (online supplementary file S1). The DSMC meets on an *ad hoc* basis to review reports of unanticipated serious adverse events (SAEs) not predefined as study outcomes. In accordance with a prespecified DSMC Charter, the DSMC advises the Executive Committee of any concerns related to participant safety and trial conduct. After each meeting, the DSMC makes a recommendation for study continuation as designed, continuation with major or minor modifications, temporary suspension of enrolment until some uncertainty is resolved, or termination.

#### **Ethics and Dissemination**

This protocol has been approved by the Comité d'éthique de la recherche du Centre intégré universitaire de santé et de services sociaux de l'Estrie – Centre hospitalier universitaire de Sherbrooke (MP-31-2018-1789). All participating clinical sites receive local

1  
2  
3 research ethics board (REB) approval prior to commencing participant enrolment. Before  
4  
5 initiating the trial, each clinical site provides the Coordinating Centre with a copy of their  
6  
7 local REB approval letter and approved informed consent form (sample in online  
8  
9 supplementary file S4). Any required protocol amendments are submitted to each REB and  
10  
11 disseminated to all investigators.  
12  
13

14  
15 Informed consent is obtained by local research personnel, who approach eligible  
16  
17 patients directly if they are able to consent. If the eligible patient is not capable, research  
18  
19 personnel approach the substitute decision-maker (SDM) to obtain consent in person, or by  
20  
21 telephone if the SDM is unavailable. Alternatively, the patient is randomized and consent is  
22  
23 obtained subsequently under a deferred consent model, where permitted by the site REB.  
24  
25 Consent is requested for future laboratory analyses that may arise from this protocol.  
26  
27

28  
29 All personal health information collected during the study remains strictly confidential  
30  
31 in a secure database. Participants are identified by an alphanumeric code, and the linkage  
32  
33 from the alphanumeric code to identifying information is kept in secure storage under the  
34  
35 supervision of the local principal investigator.  
36  
37

38  
39 There is no compensation for harm suffered from trial participation; details on data  
40  
41 collection for adverse events are given above. Patients enrolled in this trial are critically ill  
42  
43 and all care is provided by intensive care clinicians. There is no provision for post-trial care  
44  
45 other than usual clinical care for ICU patients.  
46  
47

48  
49 Plans for end-of-grant dissemination include presentations at international critical care  
50  
51 conferences and journal publications. In addition, building on the experience with social  
52  
53 media during the OVATION pilot trial, we will disseminate our results via social media  
54  
55 platforms and discussion forums managed by partner organizations.  
56  
57

## 58 **Data statement**

59  
60

1  
2  
3 The OVATION-65 protocol is freely accessible via this publication. The principal  
4 investigators, project leader, and study statisticians will have access to the full trial dataset;  
5  
6 there are no contractual limitations to such access. Requests for access to the participant-level  
7  
8 dataset and statistical code will be considered by the Executive Committee after publication  
9  
10 of primary results and planned secondary studies by co-investigators.  
11  
12  
13  
14  
15  
16

### 17 **Trial status**

18  
19 The current protocol is version 6, dated 29 November 2019. Participant recruitment  
20 began on 17 February 2018 and was scheduled to continue until approximately June 2020. As  
21  
22 noted, the DSMC recommended termination of enrollment on 21 February 2020. The  
23  
24 database will be locked after the last enrolled patient completes the 6-month follow-up in  
25  
26 August 2020, and 6 additional months will be required to address remaining data queries and  
27  
28 to finalize the analyses.  
29  
30  
31  
32  
33  
34  
35  
36  
37  
38  
39  
40  
41  
42  
43  
44  
45  
46  
47  
48  
49  
50  
51  
52  
53  
54  
55  
56  
57  
58  
59  
60

### Authors' contributions

NA and FLam drafted the protocol for the OVATION-65 trial and drafted the manuscript; they contributed equally and co-senior authors. MHM, MCB, MEW, RPi, NM, FD'A, CS-A, MM, M-AL, HQM, BGB, YP, ECa, AJES, IW, RPo, MC, ML, FLau, AT, DB, SM, ECh, EB-C, EB, and DC contributed to protocol development and revised the manuscript. MHM, MCB, MEW, FLam, and NA on the Executive Committee. All authors read and approved the final manuscript.

### Competing interests

The authors declare that they have no competing interests.

### Funding statement

OVATION-65 is funded by the Lotte and John Hecht Memorial Foundation (grant no. 4410); internal grants from the Université de Sherbrooke/Merck Sharp and Dohme and the Centre de recherche du CHUS/Projet Structurant; and a research chair awarded to François Lamontagne (Chaire de recherche axée sur le patient et les soins hospitaliers aigus). The funders had no role in the design of the study, ongoing data collection, planned data analysis and interpretation, or writing of this manuscript or of the study protocol. François Lamontagne is supported by an award from the Fonds de recherche du Québec - Santé.

### Acknowledgements

We thank the Unité de Recherche Clinique et Épidémiologique of the Centre de Recherche du Centre Hospitalier Universitaire de Sherbrooke for their commitment to the coordination of the study; and Claudio Martin for a careful review of an earlier version of this manuscript, on behalf of the Canadian Critical Care Trials Group Grants and Manuscripts Committee.

**Word count** [main text] 4525

## References

1. Hollenberg SM. Vasoactive drugs in circulatory shock. *Am J Respir Crit Care Med* 2011;183(7):847-55. doi: 201006-0972CI [pii]  
10.1164/rccm.201006-0972CI [published Online First: 2010/11/26]
2. Andreis DT, Singer M. Catecholamines for inflammatory shock: a Jekyll-and-Hyde conundrum. *Intensive Care Med* 2016;42(9):1387-97. doi: 10.1007/s00134-016-4249-z
3. Singer M. Catecholamine treatment for shock--equally good or bad? *Lancet* 2007;370(9588):636-7.
4. Singer M, Glynne P. Treating critical illness: the importance of first doing no harm. *PLoS Medicine / Public Library of Science* 2005;2(6):e167.
5. Walkey AJ, Adhikari NKJ, Day AG, et al. Mediation Analysis of High Blood Pressure Targets, Arrhythmias, and Shock Mortality. *Am J Respir Crit Care Med* 2019;199(6):802-05. doi: 10.1164/rccm.201808-1435LE
6. Girardis M, Busani S, Damiani E, et al. Effect of Conservative vs Conventional Oxygen Therapy on Mortality Among Patients in an Intensive Care Unit: The Oxygen-ICU Randomized Clinical Trial. *JAMA* 2016;316(15):1583-89. doi: 10.1001/jama.2016.11993
7. Arabi YM, Aldawood AS, Al-Dorzi HM, et al. Permissive Underfeeding or Standard Enteral Feeding in High- and Low-Nutritional-Risk Critically Ill Adults. Post Hoc Analysis of the PermiT Trial. *Am J Respir Crit Care Med* 2017;195(5):652-62. doi: 10.1164/rccm.201605-1012OC [published Online First: 2016/09/03]
8. Ventilation with lower tidal volumes as compared with traditional tidal volumes for acute lung injury and the acute respiratory distress syndrome. The Acute Respiratory Distress Syndrome Network. *The New England journal of medicine* 2000;342(18):1301-8.
9. Hebert PC, Wells G, Blajchman MA, et al. A multicenter, randomized, controlled clinical trial of transfusion requirements in critical care. Transfusion Requirements in Critical Care Investigators, Canadian Critical Care Trials Group. *The New England journal of medicine* 1999;340(6):409-17.
10. Bickell WH, Wall MJ, Jr., Pepe PE, et al. Immediate versus delayed fluid resuscitation for hypotensive patients with penetrating torso injuries. *The New England journal of medicine* 1994;331(17):1105-9. doi: 10.1056/NEJM199410273311701 [published Online First: 1994/10/27]
11. Rhodes A, Evans LE, Alhazzani W, et al. Surviving Sepsis Campaign: International Guidelines for Management of Sepsis and Septic Shock: 2016. *Intensive Care Med* 2017;43(3):304-77. doi: 10.1007/s00134-017-4683-6 [published Online First: 2017/01/20]
12. Lamontagne F, Cook DJ, Meade MO, et al. Vasopressor Use for Severe Hypotension-A Multicentre Prospective Observational Study. *PLoS One* 2017;12(1):e0167840. doi: 10.1371/journal.pone.0167840
13. Lamontagne F, Cook DJ, Adhikari NKJ, et al. Vasopressor administration and sepsis: A survey of Canadian intensivists. *Journal of Critical Care* 2011;26(5) doi: 10.1016/j.jcrc.2011.01.005
14. Schmittinger CA, Torgersen C, Luckner G, et al. Adverse cardiac events during catecholamine vasopressor therapy: a prospective observational study. *Intensive Care Med* 2012;38(6):950-8. doi: 10.1007/s00134-012-2531-2 [published Online First: 2012/04/25]

15. Dunser MW, Ruokonen E, Pettila V, et al. Association of arterial blood pressure and vasopressor load with septic shock mortality: a post hoc analysis of a multicenter trial. *Crit Care* 2009;13(6):R181. doi: cc8167 [pii] 10.1186/cc8167 [published Online First: 2009/11/18]
16. Asfar P, Meziani F, Hamel JF, et al. High versus Low Blood-Pressure Target in Patients with Septic Shock. *The New England journal of medicine* 2014 doi: 10.1056/NEJMoa1312173 [published Online First: 2014/03/19]
17. Lamontagne F, Meade MO, Hebert PC, et al. Higher versus lower blood pressure targets for vasopressor therapy in shock: a multicentre pilot randomized controlled trial. *Intensive Care Med* 2016;42(4):542-50. doi: 10.1007/s00134-016-4237-3
18. Lamontagne F, Day AG, Meade MO, et al. Pooled analysis of higher versus lower blood pressure targets for vasopressor therapy septic and vasodilatory shock. *Intensive Care Med* 2018;44(1):12-21. doi: 10.1007/s00134-017-5016-5 [published Online First: 2017/12/21]
19. Rochweg B, Hylands M, Moller M, et al. CCCS-SSAI WikiRecs Clinical Practice Guideline: vasopressor blood pressure targets in critically ill adults with hypotension. *Can J Anaesth* 2017;64(7):763-65. doi: 10.1007/s12630-017-0878-0 [published Online First: 2017/05/13]
20. Richards-Belle A, Mouncey PR, Grieve RD, et al. Evaluating the clinical and cost-effectiveness of permissive hypotension in critically ill patients aged 65 years or over with vasodilatory hypotension: Protocol for the 65 randomised clinical trial. *J Intensive Care Soc* 2019:1751143719870088. doi: 10.1177/1751143719870088
21. Thomas K, Patel A, Sadique MZ, et al. Evaluating the clinical and cost-effectiveness of permissive hypotension in critically ill patients aged 65 years or over with vasodilatory hypotension: Statistical and Health Economic Analysis Plan for the 65 trial. *J Intensive Care Soc* 2019:1751143719860387. doi: 10.1177/1751143719860387
22. Lamontagne F, Richards-Belle A, Thomas K, et al. Effect of Reduced Exposure to Vasopressors on 90-Day Mortality in Older Critically Ill Patients With Vasodilatory Hypotension: A Randomized Clinical Trial. *JAMA* 2020 doi: 10.1001/jama.2020.0930 [published Online First: 2020/02/13]
23. Vincent JL, Moreno R, Takala J, et al. The SOFA (Sepsis-related Organ Failure Assessment) score to describe organ dysfunction/failure. On behalf of the Working Group on Sepsis-Related Problems of the European Society of Intensive Care Medicine. *Intensive Care Med* 1996;22(7):707-10. doi: 10.1007/bf01709751 [published Online First: 1996/07/01]
24. Petros AJ, Marshall JC, van Saene HK. Should morbidity replace mortality as an endpoint for clinical trials in intensive care? *Lancet* 1995;345(8946):369-71. doi: 10.1016/s0140-6736(95)90347-x [published Online First: 1995/02/11]
25. Svensson S, Menkes DB, Lexchin J. Surrogate outcomes in clinical trials: a cautionary tale. *JAMA Intern Med* 2013;173(8):611-2. doi: 10.1001/jamainternmed.2013.3037 [published Online First: 2013/03/27]
26. Harris PA, Taylor R, Minor BL, et al. The REDCap consortium: Building an international community of software platform partners. *J Biomed Inform* 2019;95:103208. doi: 10.1016/j.jbi.2019.103208 [published Online First: 2019/05/13]
27. Harris PA, Taylor R, Thielke R, et al. Research electronic data capture (REDCap)--a metadata-driven methodology and workflow process for providing translational research informatics support. *J Biomed Inform* 2009;42(2):377-81. doi: 10.1016/j.jbi.2008.08.010 [published Online First: 2008/10/22]

- 1
  - 2
  - 3
  - 4
  - 5
  - 6
  - 7
  - 8
  - 9
  - 10
  - 11
  - 12
  - 13
  - 14
  - 15
  - 16
  - 17
  - 18
  - 19
  - 20
  - 21
  - 22
  - 23
  - 24
  - 25
  - 26
  - 27
  - 28
  - 29
  - 30
  - 31
  - 32
  - 33
  - 34
  - 35
  - 36
  - 37
  - 38
  - 39
  - 40
  - 41
  - 42
  - 43
  - 44
  - 45
  - 46
  - 47
  - 48
  - 49
  - 50
  - 51
  - 52
  - 53
  - 54
  - 55
  - 56
  - 57
  - 58
  - 59
  - 60
28. Angriman F, Masse MH, Adhikari NKJ. Defining standard of practice: pros and cons of the usual care arm. *Curr Opin Crit Care* 2019;25(5):498-504. doi: 10.1097/MCC.0000000000000642 [published Online First: 2019/07/25]
29. Bellani G, Laffey JG, Pham T, et al. Epidemiology, Patterns of Care, and Mortality for Patients With Acute Respiratory Distress Syndrome in Intensive Care Units in 50 Countries. *JAMA* 2016;315(8):788-800. doi: 10.1001/jama.2016.0291
30. Schortgen F, Schetz M. Does this critically ill patient with oliguria need more fluids, a vasopressor, or neither? *Intensive Care Med* 2017;43(6):907-10. doi: 10.1007/s00134-017-4744-x [published Online First: 2017/03/16]
31. Brown SM, Lanspa MJ, Jones JP, et al. Survival after shock requiring high-dose vasopressor therapy. *Chest* 2013;143(3):664-71. doi: 10.1378/chest.12-1106 [published Online First: 2012/08/23]
32. Lim W, Qushmaq I, Devereaux PJ, et al. Elevated cardiac troponin measurements in critically ill patients. *Arch Intern Med* 2006;166(22):2446-54. doi: 10.1001/archinte.166.22.2446
33. Masson S, Caironi P, Fanizza C, et al. Sequential N-Terminal Pro-B-Type Natriuretic Peptide and High-Sensitivity Cardiac Troponin Measurements During Albumin Replacement in Patients With Severe Sepsis or Septic Shock. *Crit Care Med* 2016;44(4):707-16. doi: 10.1097/CCM.0000000000001473
34. Poe S, Vandivier-Pletsch RH, Clay M, et al. Cardiac Troponin Measurement in the Critically Ill: Potential for Guiding Clinical Management. *J Investig Med* 2015;63(8):905-15. doi: 10.1097/JIM.0000000000000239
35. Rosjo H, Varpula M, Hagve TA, et al. Circulating high sensitivity troponin T in severe sepsis and septic shock: distribution, associated factors, and relation to outcome. *Intensive Care Med* 2011;37(1):77-85. doi: 10.1007/s00134-010-2051-x
36. Waxman DA, Hecht S, Schappert J, et al. A model for troponin I as a quantitative predictor of in-hospital mortality. *J Am Coll Cardiol* 2006;48(9):1755-62. doi: 10.1016/j.jacc.2006.05.075
37. Glushakova OY, Glushakov AV, Miller ER, et al. Biomarkers for acute diagnosis and management of stroke in neurointensive care units. *Brain Circ* 2016;2(1):28-47. doi: 10.4103/2394-8108.178546 [published Online First: 2016/01/01]
38. Shemilt M, Boutin A, Lauzier F, et al. Prognostic Value of Glial Fibrillary Acidic Protein in Patients With Moderate and Severe Traumatic Brain Injury: A Systematic Review and Meta-Analysis. *Crit Care Med* 2019;47(6):e522-e29. doi: 10.1097/CCM.0000000000003728 [published Online First: 2019/03/20]
39. Papa L, Brophy GM, Welch RD, et al. Time Course and Diagnostic Accuracy of Glial and Neuronal Blood Biomarkers GFAP and UCH-L1 in a Large Cohort of Trauma Patients With and Without Mild Traumatic Brain Injury. *JAMA Neurol* 2016;73(5):551-60. doi: 10.1001/jamaneurol.2016.0039 [published Online First: 2016/03/29]
40. Fink EL, Berger RP, Clark RS, et al. Serum biomarkers of brain injury to classify outcome after pediatric cardiac arrest\*. *Critical care medicine* 2014;42(3):664-74. doi: 10.1097/01.ccm.0000435668.53188.80 [published Online First: 2013/10/30]
41. Anderson BJ, Reilly JP, Shashaty MGS, et al. Admission plasma levels of the neuronal injury marker neuron-specific enolase are associated with mortality and delirium in sepsis. *J Crit Care* 2016;36:18-23. doi: 10.1016/j.jcrc.2016.06.012 [published Online First: 2016/11/05]

- 1
- 2
- 3 42. Thomson SJ, Cowan ML, Johnston I, et al. 'Liver function tests' on the intensive care unit:  
4 a prospective, observational study. *Intensive Care Med* 2009;35(8):1406-11. doi:  
5 10.1007/s00134-009-1511-7 [published Online First: 2009/06/11]
- 6
- 7 43. Derikx JP, Schellekens DH, Acosta S. Serological markers for human intestinal ischemia:  
8 A systematic review. *Best Pract Res Clin Gastroenterol* 2017;31(1):69-74. doi:  
9 10.1016/j.bpg.2017.01.004
- 10
- 11 44. Shapiro ML, Baldea A, Luchette FA. Rhabdomyolysis in the intensive care unit. *J*  
12 *Intensive Care Med* 2012;27(6):335-42. doi: 10.1177/0885066611402150 [published  
13 Online First: 2011/03/26]
- 14
- 15 45. Kidney Disease: Improving Global Outcomes (KDIGO) Acute Kidney Injury Work  
16 Group. KDIGO Clinical Practice Guideline for Acute Kidney Injury. *Kidney Int Suppl*  
17 (2011) 2012;2:1-138.
- 18
- 19 46. Walkey AJ, Wiener RS, Ghobrial JM, et al. Incident stroke and mortality associated with  
20 new-onset atrial fibrillation in patients hospitalized with severe sepsis. *JAMA*  
21 2011;306(20):2248-54. doi: 10.1001/jama.2011.1615
- 22
- 23 47. Knopman DS, Roberts RO, Geda YE, et al. Validation of the telephone interview for  
24 cognitive status-modified in subjects with normal cognition, mild cognitive  
25 impairment, or dementia. *Neuroepidemiology* 2010;34(1):34-42. doi:  
26 10.1159/000255464 [published Online First: 2009/11/07]
- 27
- 28 48. Cook D, Lauzier F, Rocha MG, et al. Serious adverse events in academic critical care  
29 research. *CMAJ : Canadian Medical Association journal = journal de l'Association*  
30 *medicale canadienne* 2008;178(9):1181-4. doi: 10.1503/cmaj.071366 [published  
31 Online First: 2008/04/23]
- 32
- 33 49. Knaus WA, Draper EA, Wagner DP, et al. APACHE II: a severity of disease classification  
34 system. *Crit Care Med* 1985;13(10):818-29. [published Online First: 1985/10/01]
- 35
- 36 50. Rockwood K, Song X, MacKnight C, et al. A global clinical measure of fitness and frailty  
37 in elderly people. *CMAJ : Canadian Medical Association journal = journal de*  
38 *l'Association medicale canadienne* 2005;173(5):489-95. doi: 10.1503/cmaj.050051  
39 [published Online First: 2005/09/01]
- 40
- 41 51. Cohen J. *Statistical Power Analysis for the Behavioral Sciences*, 2nd ed. New York:  
42 Lawrence Erlbaum Associates 1988.
- 43
- 44 52. Weuve J, Tchetgen Tchetgen EJ, Glymour MM, et al. Accounting for bias due to selective  
45 attrition: the example of smoking and cognitive decline. *Epidemiology*  
46 2012;23(1):119-28. doi: 10.1097/EDE.0b013e318230e861 [published Online First:  
47 2011/10/13]
- 48
- 49 53. Russell JA, Walley KR, Singer J, et al. Vasopressin versus norepinephrine infusion in  
50 patients with septic shock. *The New England journal of medicine* 2008;358(9):877-87.  
51 doi: 10.1056/NEJMoa067373 [published Online First: 2008/02/29]
- 52
- 53
- 54
- 55
- 56
- 57
- 58
- 59
- 60



**Online supplementary files**

S1 (.pdf format)

OVATION-65 contributors.

S2 (.pdf format)

SPIRIT checklist.

S3 (.pdf format)

Ancillary studies.

S4 (.pdf format)

Model informed consent form.

**Figure legend**

Figure 1. Progress of patients through the trial. 'Co-enrolled in another study' refers to a study for which the principal investigators of OVATION-65 or the other study had prespecified that co-enrolment would not be allowed.

Table 1 Summary of objectives and outcomes

| Objectives                        | Outcomes                                                                                                                                                                                        |
|-----------------------------------|-------------------------------------------------------------------------------------------------------------------------------------------------------------------------------------------------|
| <b>Biomarkers of organ injury</b> |                                                                                                                                                                                                 |
| Heart                             | High-sensitivity cardiac troponin T (hsTnT)<br>N-terminal pro-B-type natriuretic peptide (NT-proBNP)                                                                                            |
| Brain                             | Glial fibrillary acidic protein (GFAP)<br>Ubiquitin C-terminal hydrolase L1 (UCHL1)<br>Myelin Basic Protein (MBP)<br>Neuron-specific enolase (NSE)                                              |
| Liver                             | Alanine aminotransferase (ALT)                                                                                                                                                                  |
| Intestine                         | Intestinal-type fatty acid binding protein (FABP2)                                                                                                                                              |
| Skeletal muscle                   | Creatinine kinase, muscular (CKM)                                                                                                                                                               |
| <b>Global tissue dysoxia</b>      | Lactate                                                                                                                                                                                         |
| <b>Organ function</b>             | Sequential Organ Failure Assessment (SOFA) score on days 1, 2, 3, 4, 7, 10, 14, and 28 while in the ICU                                                                                         |
| <b>Resource utilization</b>       | Incidence and duration of mechanical ventilation<br>Incidence and duration of renal replacement therapy<br>Duration of vasopressor therapy<br>Duration of ICU stay<br>Duration of hospital stay |
| <b>Adverse events</b>             | Supraventricular arrhythmia<br>Stroke<br>Acute kidney injury (KDIGO stage 3)<br>Limb ischemia<br>Intestinal ischemia                                                                            |
| <b>Mortality</b>                  | 90 days<br>6 months                                                                                                                                                                             |
| <b>Cognitive impairment</b>       | Telephone Interview for Cognitive Status (TICS) at 6 months                                                                                                                                     |

KDIGO, Kidney Disease: Improving Global Outcomes.

All biomarkers are measured in plasma.

Table 2 OVATION-65 Trial Timeline

|                                                                           | Study Period             |                 |   |   |         |   |         |    |           |    |           |    |             |
|---------------------------------------------------------------------------|--------------------------|-----------------|---|---|---------|---|---------|----|-----------|----|-----------|----|-------------|
|                                                                           | Days                     | Days            |   |   |         |   |         |    |           |    |           |    | Months      |
|                                                                           | Enrolment/<br>Allocation | Post-Allocation |   |   |         |   |         |    |           |    |           |    |             |
| TIME POINTS                                                               | 1                        | 2               | 3 | 4 | 5-<br>6 | 7 | 8-<br>9 | 10 | 11-<br>13 | 14 | 15-<br>27 | 28 | 6<br>months |
| <b>ENROLMENT:</b>                                                         |                          |                 |   |   |         |   |         |    |           |    |           |    |             |
| Eligibility screen                                                        | x                        |                 |   |   |         |   |         |    |           |    |           |    |             |
| Informed consent                                                          | x                        |                 |   |   |         |   |         |    |           |    |           |    |             |
| Allocation                                                                | x                        |                 |   |   |         |   |         |    |           |    |           |    |             |
| <b>INTERVENTION:</b>                                                      |                          |                 |   |   |         |   |         |    |           |    |           |    |             |
| Permissive hypotension<br>(MAP 60-65 mmHg)<br>vs. usual care <sup>a</sup> |                          |                 |   |   |         |   |         |    |           |    |           | →  |             |
| <b>ASSESSMENTS:</b>                                                       |                          |                 |   |   |         |   |         |    |           |    |           |    |             |
| <b>Baseline variables</b>                                                 |                          |                 |   |   |         |   |         |    |           |    |           |    |             |
| Diagnosis of admission                                                    | x                        |                 |   |   |         |   |         |    |           |    |           |    |             |
| Severity of illness<br>(APACHE II score)                                  | x                        |                 |   |   |         |   |         |    |           |    |           |    |             |
| Pre-existing<br>comorbidities<br>(Clinical Frailty Score)                 | x                        |                 |   |   |         |   |         |    |           |    |           |    |             |
| <b>Outcomes</b>                                                           |                          |                 |   |   |         |   |         |    |           |    |           |    |             |
| Troponin hs TnT <sup>b</sup>                                              | x                        |                 | x |   |         | x |         |    |           |    |           |    |             |
| Biomarkers of organ<br>injury <sup>c</sup>                                | x                        |                 | x |   |         | x |         |    |           |    |           |    |             |
| Global tissue dysoxia<br>(lactate)                                        | x                        |                 | x |   |         | x |         |    |           |    |           |    |             |
| Organ function<br>including renal<br>function (SOFA score)                | x                        | x               | x | x |         | x |         | x  |           | x  |           | x  |             |
| Resource utilization <sup>d</sup>                                         |                          |                 |   |   |         |   |         |    |           | x  |           |    |             |
| Mortality at 90 days<br>and 6 months                                      |                          |                 |   |   |         |   |         |    |           |    |           | →  | x           |
| Cognitive impairment<br>(TICS) at 6 months                                |                          |                 |   |   |         |   |         |    |           |    |           |    | x           |
| Stroke                                                                    |                          |                 |   |   |         |   |         |    |           |    |           | →  |             |
| Supraventricular<br>arrhythmia                                            |                          |                 |   |   |         |   |         |    |           |    |           | →  |             |
| Limb or intestinal<br>ischemia                                            |                          |                 |   |   |         |   |         |    |           |    |           | →  |             |
| Occurrence of stage 3<br>acute kidney injury <sup>e</sup>                 |                          |                 |   |   |         |   |         |    |           |    |           | →  |             |
| <b>Other variables</b>                                                    |                          |                 |   |   |         |   |         |    |           |    |           |    |             |
| Protocol adherence <sup>f</sup>                                           |                          |                 |   |   |         |   |         |    |           |    |           | →  |             |
| Co-interventions <sup>g</sup>                                             |                          |                 |   |   |         |   |         |    |           |    |           | →  |             |

<sup>a</sup> Mean arterial pressure target while receiving vasopressor therapy up to day 28, or discontinuation for more than 24 hours.

<sup>b</sup> hs TnT at day 3 is the primary outcome and at day 7 is a secondary outcome

1  
2  
3 <sup>c</sup> NT-proBNP, GFAP, UCHL1, Myelin Basic Protein, NSE, ALT, intestinal-fatty acid binding protein, CK

4 <sup>d</sup> Mechanical ventilation, renal replacement therapy, vasopressor therapy, ICU and hospital stay

5 <sup>e</sup> As defined by KDIGO (Kidney Disease: Improving Global Outcomes) criteria

6 <sup>f</sup> Mean arterial pressure reached while on vasopressor therapy and samples collected per protocol instructions

7 <sup>g</sup> Inotropes, corticosteroids, benzodiazepines, opioids, propofol, epidural anesthesia

8  
9  
10  
11  
12  
13  
14  
15  
16  
17  
18  
19  
20  
21  
22  
23  
24  
25  
26  
27  
28  
29  
30  
31  
32  
33  
34  
35  
36  
37  
38  
39  
40  
41  
42  
43  
44  
45  
46  
47  
48  
49  
50  
51  
52  
53  
54  
55  
56  
57  
58  
59  
60

For peer review only

Table 3 Baseline characteristics

| Characteristic                                                           | Permissive hypotension (n= ) | Usual care (n= ) |
|--------------------------------------------------------------------------|------------------------------|------------------|
| <i>Demographics</i>                                                      |                              |                  |
| Age, years, mean (SD)                                                    |                              |                  |
| Female sex, n (%)                                                        |                              |                  |
| Weight, kg; mean (SD)                                                    |                              |                  |
| Clinical Frailty Scale <sup>a</sup> >4, n (%)                            |                              |                  |
| APACHE II <sup>b</sup> , mean (SD)                                       |                              |                  |
| <i>Comorbidities</i>                                                     |                              |                  |
| Cardiac, n (%)                                                           |                              |                  |
| Supraventricular arrhythmia                                              |                              |                  |
| Ventricular arrhythmia                                                   |                              |                  |
| Coronary artery disease <sup>c</sup>                                     |                              |                  |
| CHF class 1-3                                                            |                              |                  |
| CHF class 4                                                              |                              |                  |
| LVEF, % (mean, SD)                                                       |                              |                  |
| Vascular, n (%)                                                          |                              |                  |
| Known hypertension                                                       |                              |                  |
| Peripheral vascular disease or claudication                              |                              |                  |
| Cerebrovascular disease                                                  |                              |                  |
| Diabetes (type 1 or 2), n (%)                                            |                              |                  |
| Renal, n (%)                                                             |                              |                  |
| Receiving chronic dialysis                                               |                              |                  |
| Baseline creatinine <sup>d</sup> ; mean (SD)                             |                              |                  |
| Child's B or C cirrhosis, n (%)                                          |                              |                  |
| Chronic lung disease, n (%)                                              |                              |                  |
| Immunosuppression, n (%)                                                 |                              |                  |
| Cognitive impairment or dementia, n (%)                                  |                              |                  |
| <i>ICU admission data</i>                                                |                              |                  |
| Primary ICU diagnosis, n (%)                                             |                              |                  |
| Medical                                                                  |                              |                  |
| Surgical                                                                 |                              |                  |
| Transfer from another hospital, n (%)                                    |                              |                  |
| Time from ICU admission to randomization, hours; mean (SD)               |                              |                  |
| Vasopressor dose, mean norepinephrine equivalents (mean µg/kg/min, [SD]) |                              |                  |
| Vasopressors, n (%)                                                      |                              |                  |
| Norepinephrine                                                           |                              |                  |
| Epinephrine                                                              |                              |                  |
| Dopamine                                                                 |                              |                  |
| Phenylephrine                                                            |                              |                  |
| Vasopressin                                                              |                              |                  |
| Inotropes, n (%)                                                         |                              |                  |
| Dobutamine                                                               |                              |                  |
| Milrinone                                                                |                              |                  |
| Mean arterial pressure, mmHg; mean (SD)                                  |                              |                  |

1  
2  
3 APACHE II, acute physiology and chronic health evaluation II, CABG, coronary artery  
4 bypass grafting; CHF, congestive heart failure; MI, myocardial infarction; PCI, percutaneous  
5 coronary intervention  
6

7  
8 <sup>a</sup>The Clinical Frailty Scale <sup>50</sup> ranges from 1 to 7, with scores of 5-7 denoting frailty.  
9 Scores on the APACHE II <sup>49</sup> range from 0 to 71, with higher scores indicating more severe  
10 disease and a higher risk of death.

11 <sup>b</sup>Scores on the SOFA <sup>23</sup> range from 0 to 24, with higher scores indicating more severe  
12 disease and a higher risk of death.

13 <sup>c</sup>Coronary artery disease included angina and previous MI, PCI, or CABG.

14 <sup>d</sup>The baseline creatine was determined from the outpatient creatinine within the last 12  
15 months and closest to admission (n= ) or, if not available, then the lowest inpatient creatinine  
16 before ICU admission (n= ).  
17  
18  
19  
20  
21  
22  
23  
24  
25  
26  
27  
28  
29  
30  
31  
32  
33  
34  
35  
36  
37  
38  
39  
40  
41  
42  
43  
44  
45  
46  
47  
48  
49  
50  
51  
52  
53  
54  
55  
56  
57  
58  
59  
60

1  
2  
3  
4  
5  
6  
7  
8  
9  
10  
11  
12  
13  
14  
15  
16  
17  
18  
19  
20  
21  
22  
23  
24  
25  
26  
27  
28  
29  
30  
31  
32  
33  
34  
35  
36  
37  
38  
39  
40  
41

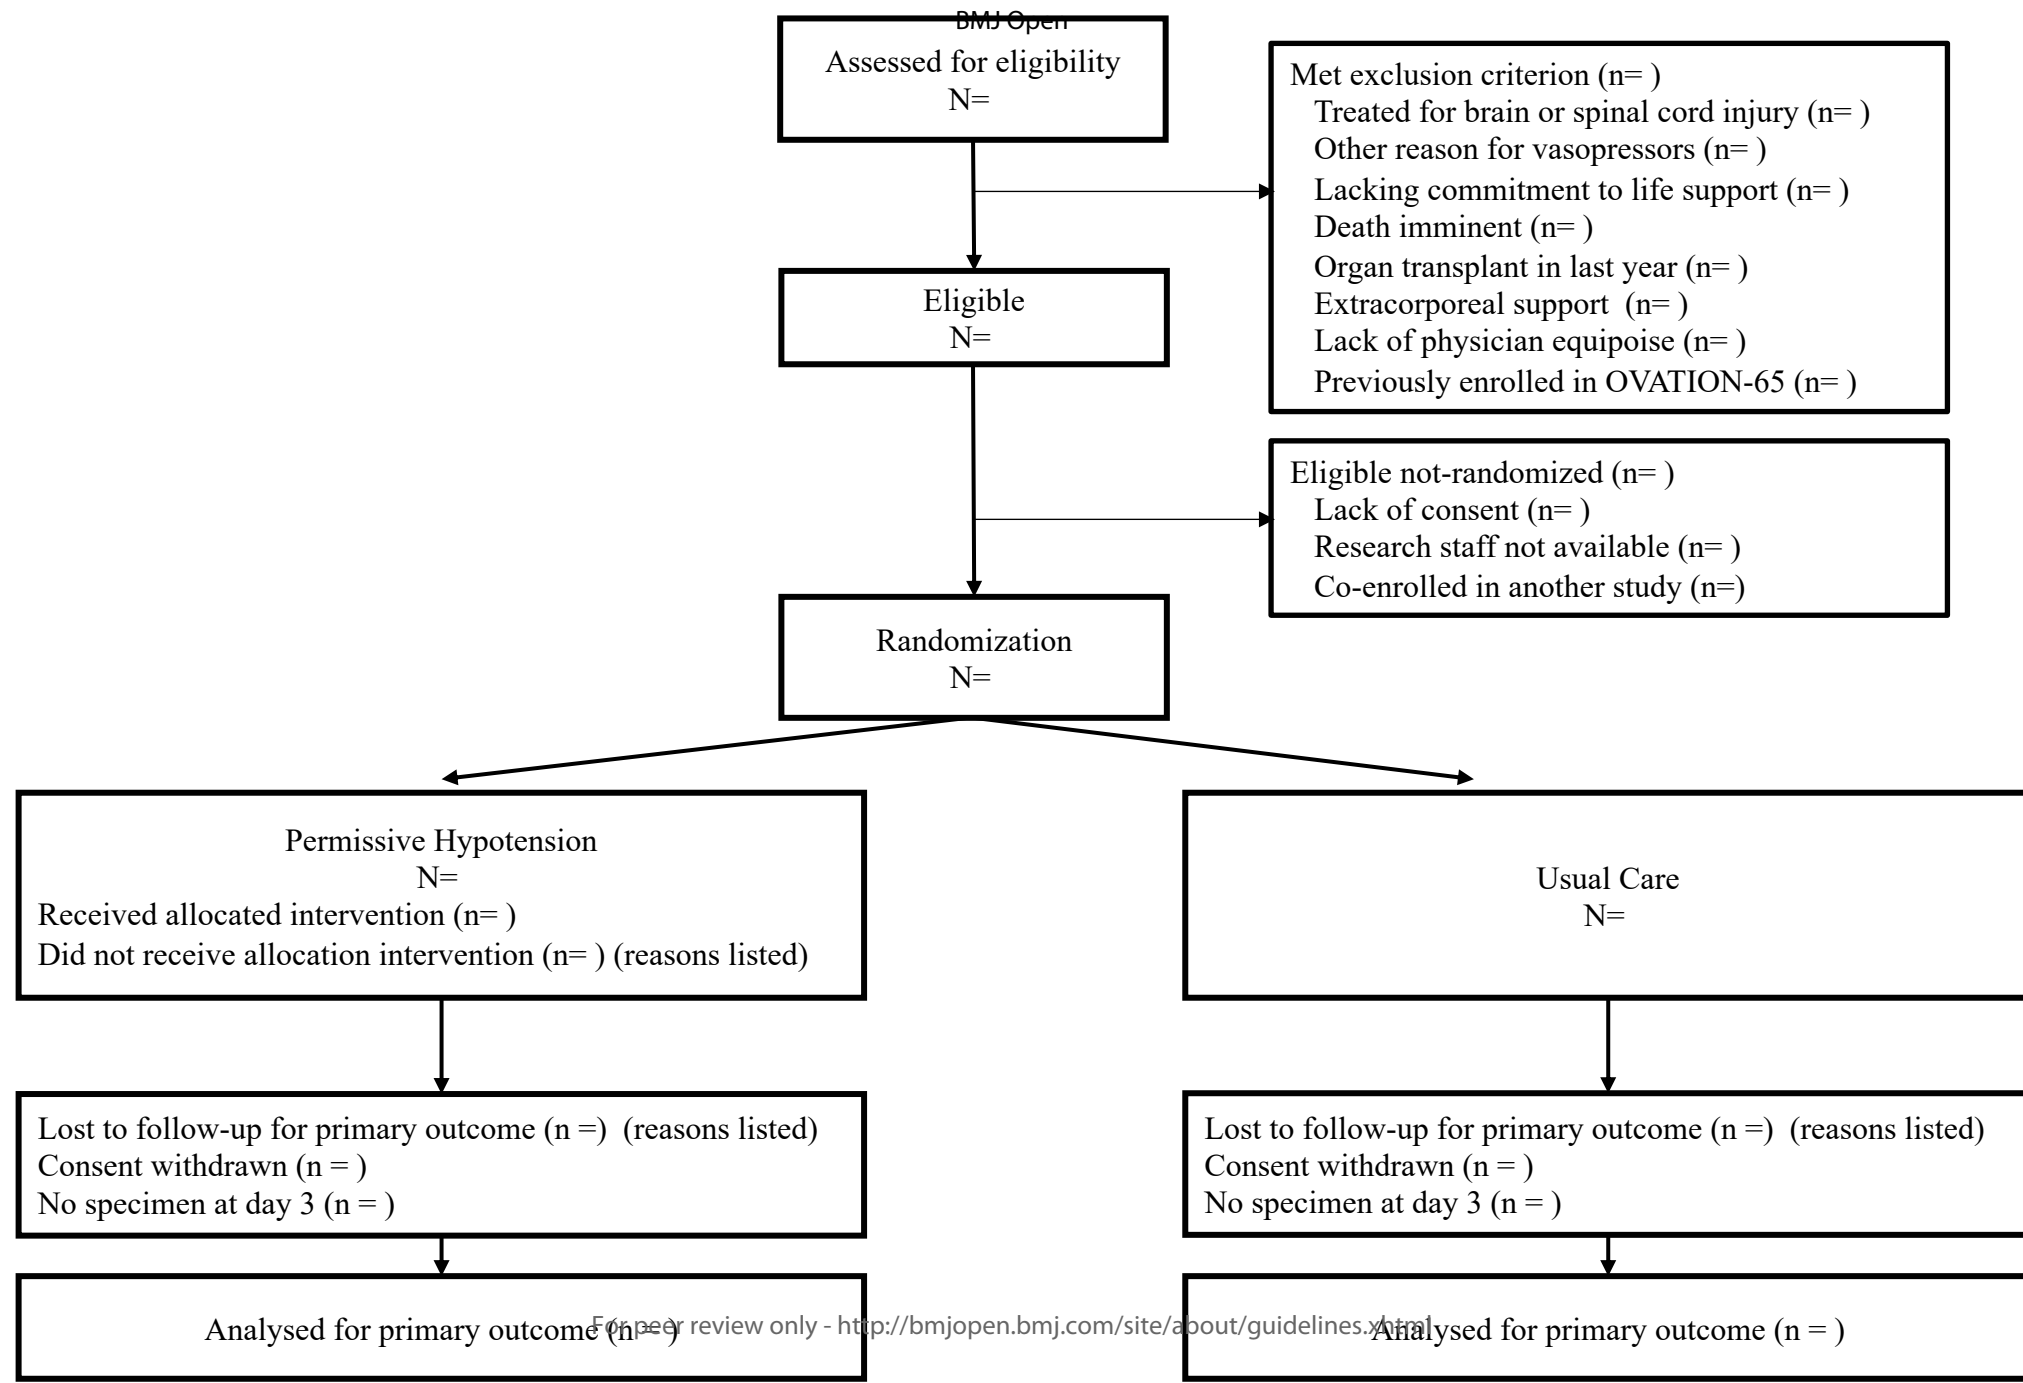

## Online supplementary file S1 OVATION-65 team members

### Executive Committee

Neill KJ Adhikari (PI, co-chair), François Lamontagne (PI, co-chair), M. Elizabeth Wilcox, (PI) Marie-Claude Battista (co-I), Marie-Hélène Masse (PL)

### Data Safety Monitoring Committee

Andreas Laupacis (chair), Lauren Griffith, Scott Halpern

### Coordinating Centre Personnel

Marie-Claude Battista, Marie-Hélène Masse, Louise Robert-Petit, Marie-Ève Thibault

### Contributors to ancillary studies

François-Michel Boisvert, Lee Hwa Tai, Jean-Luc Parent, Xavier Roucou

### Participating Clinical Site Personnel

#### *CIUSSS de l'Estrie – Centre Hospitalier Universitaire de Sherbrooke*

François Lamontagne (PI), Frédérick D'Aragnon (Co-I), Marc-André Leclair (Co-I), Michaël Mayette (Co-I), Yannick Poulin (Co-I), Hector Quiroz-Martinez (Co-I), Charles St-Arnaud (Co-I), Éline Carbonneau (RC), Line Côté (RC), Marilène Ladouceur (RC), Joannie Marchand (RA), Marie-Hélène Masse (RC), Noémie Turcotte (RA)

#### *Centre Hospitalier de l'Université de Montréal*

Michaël Chassé (PI), Martine Lebrasseur (RC), Fatna Benettaib (RC), Dounia Boumahni (RC), Marie-Ève Cantin (RA), Ali Ghamraoui (RC), Maya Salame (RC)

#### *The Ottawa Hospital (General Campus and Civic Campus)*

Andrew Seely (PI), Irene Watpool (RC), Rebecca Porteous (RC), Sydney Mieztitis (RA)

#### *Sunnybrook Health Sciences Centre*

Neill KJ Adhikari (PI), Andre Carlos Amaral (Co-I), Brian Cuthbertson (Co-I), Robert Fowler (Co-I), Damon Scales (Co-I), Nicole Marinoff (RC), Navjot Kaur (RC), Wael Mohammed (RC)

#### *Centre Hospitalier Universitaire de Québec-Université Laval*

François Lauzier (PI), Alexis Turgeon (Co-I), Charles Francoeur (Co-I), Guillaume Leblanc (Co-I), David Bellemare (RC), Olivier Costerousse (RC), Stéphanie Grenier (RA), Gabrielle Guilbault (RA), Marjorie Daigle (RA), Ève Cloutier (RA), Isabelle St-Hilaire (RA).

#### *Mount Sinai Hospital*

Sangeeta Mehta (PI), Laveena Munshi (Co-I), Sumesh Shah (RC)

#### *Toronto Western Hospital*

Elizabeth Wilcox (PI), Jeffrey Singh (Co-I), Karolina Walczak (RC)

*Juravinski Hospital* (activation in progress and no patients enrolled at the time of manuscript submission)

Bram Rochweg (PI), Tina Millen (RC)

### Abbreviations:

Co-I – co-investigator; PI – principal investigator; PL – project leader; RA – research assistant; RC – research coordinator



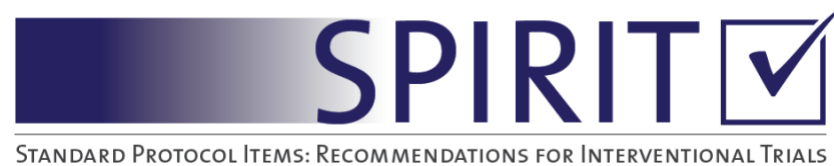

STANDARD PROTOCOL ITEMS: RECOMMENDATIONS FOR INTERVENTIONAL TRIALS

SPIRIT 2013 Checklist: Recommended items to address in a clinical trial protocol and related documents\*

| Section/item                      | Item No | Description                                                                                                                                                                                                                                                                              | Addressed on page number |
|-----------------------------------|---------|------------------------------------------------------------------------------------------------------------------------------------------------------------------------------------------------------------------------------------------------------------------------------------------|--------------------------|
| <b>Administrative information</b> |         |                                                                                                                                                                                                                                                                                          |                          |
| Title                             | 1       | Descriptive title identifying the study design, population, interventions, and, if applicable, trial acronym                                                                                                                                                                             | 1                        |
| Trial registration                | 2a      | Trial identifier and registry name. If not yet registered, name of intended registry                                                                                                                                                                                                     | 3, 18                    |
|                                   | 2b      | All items from the World Health Organization Trial Registration Data Set                                                                                                                                                                                                                 | 3, 18                    |
| Protocol version                  | 3       | Date and version identifier                                                                                                                                                                                                                                                              | 22                       |
| Funding                           | 4       | Sources and types of financial, material, and other support                                                                                                                                                                                                                              | 23                       |
| Roles and responsibilities        | 5a      | Names, affiliations, and roles of protocol contributors                                                                                                                                                                                                                                  | 1, 23                    |
|                                   | 5b      | Name and contact information for the trial sponsor                                                                                                                                                                                                                                       | 23                       |
|                                   | 5c      | Role of study sponsor and funders, if any, in study design; collection, management, analysis, and interpretation of data; writing of the report; and the decision to submit the report for publication, including whether they will have ultimate authority over any of these activities | 23                       |
|                                   | 5d      | Composition, roles, and responsibilities of the coordinating centre, steering committee, endpoint adjudication committee, data management team, and other individuals or groups overseeing the trial, if applicable (see Item 21a for data monitoring committee)                         | 8,19                     |

1 **Introduction**

2

3 Background and 6a Description of research question and justification for undertaking the trial, including summary of relevant 2, 5,6,7  
4 rationale studies (published and unpublished) examining benefits and harms for each intervention  
5

6 6b Explanation for choice of comparators 10,11  
7

8 Objectives 7 Specific objectives or hypotheses 2, 7  
9

10 Trial design 8 Description of trial design including type of trial (eg, parallel group, crossover, factorial, single group),  
11 allocation ratio, and framework (eg, superiority, equivalence, noninferiority, exploratory) 7,8  
12  
13

14 **Methods: Participants, interventions, and outcomes**

15

16 Study setting 9 Description of study settings (eg, community clinic, academic hospital) and list of countries where data will 8  
17 be collected. Reference to where list of study sites can be obtained  
18

19 Eligibility criteria 10 Inclusion and exclusion criteria for participants. If applicable, eligibility criteria for study centres and 8,9  
20 individuals who will perform the interventions (eg, surgeons, psychotherapists)  
21

22 Interventions 11a Interventions for each group with sufficient detail to allow replication, including how and when they will be 9,10,11  
23 administered  
24

25 11b Criteria for discontinuing or modifying allocated interventions for a given trial participant (eg, drug dose 10  
26 change in response to harms, participant request, or improving/worsening disease)  
27

28 11c Strategies to improve adherence to intervention protocols, and any procedures for monitoring adherence 14,15  
29 (eg, drug tablet return, laboratory tests)  
30

31 11d Relevant concomitant care and interventions that are permitted or prohibited during the trial 11, 28  
32

33 Outcomes 12 Primary, secondary, and other outcomes, including the specific measurement variable (eg, systolic blood  
34 pressure), analysis metric (eg, change from baseline, final value, time to event), method of aggregation (eg, 11,12,13  
35 median, proportion), and time point for each outcome. Explanation of the clinical relevance of chosen  
36 efficacy and harm outcomes is strongly recommended  
37

38 Participant timeline 13 Time schedule of enrolment, interventions (including any run-ins and washouts), assessments, and visits for 16, 30  
39 participants. A schematic diagram is highly recommended (see Figure)  
40  
41  
42

|    |                                                                     |     |                                                                                                                                                                                                                                                                                                                                                                                                              |                |
|----|---------------------------------------------------------------------|-----|--------------------------------------------------------------------------------------------------------------------------------------------------------------------------------------------------------------------------------------------------------------------------------------------------------------------------------------------------------------------------------------------------------------|----------------|
| 1  | Sample size                                                         | 14  | Estimated number of participants needed to achieve study objectives and how it was determined, including clinical and statistical assumptions supporting any sample size calculations                                                                                                                                                                                                                        | 16             |
| 2  |                                                                     |     |                                                                                                                                                                                                                                                                                                                                                                                                              |                |
| 3  |                                                                     |     |                                                                                                                                                                                                                                                                                                                                                                                                              |                |
| 4  | Recruitment                                                         | 15  | Strategies for achieving adequate participant enrolment to reach target sample size                                                                                                                                                                                                                                                                                                                          | 16,19          |
| 5  |                                                                     |     |                                                                                                                                                                                                                                                                                                                                                                                                              |                |
| 6  | <b>Methods: Assignment of interventions (for controlled trials)</b> |     |                                                                                                                                                                                                                                                                                                                                                                                                              |                |
| 7  |                                                                     |     |                                                                                                                                                                                                                                                                                                                                                                                                              |                |
| 8  | Allocation:                                                         |     |                                                                                                                                                                                                                                                                                                                                                                                                              |                |
| 9  |                                                                     |     |                                                                                                                                                                                                                                                                                                                                                                                                              |                |
| 10 | Sequence                                                            | 16a | Method of generating the allocation sequence (eg, computer-generated random numbers), and list of any factors for stratification. To reduce predictability of a random sequence, details of any planned restriction (eg, blocking) should be provided in a separate document that is unavailable to those who enrol participants or assign interventions                                                     | 9              |
| 11 | generation                                                          |     |                                                                                                                                                                                                                                                                                                                                                                                                              |                |
| 12 |                                                                     |     |                                                                                                                                                                                                                                                                                                                                                                                                              |                |
| 13 |                                                                     |     |                                                                                                                                                                                                                                                                                                                                                                                                              |                |
| 14 |                                                                     |     |                                                                                                                                                                                                                                                                                                                                                                                                              |                |
| 15 |                                                                     |     |                                                                                                                                                                                                                                                                                                                                                                                                              |                |
| 16 | Allocation                                                          | 16b | Mechanism of implementing the allocation sequence (eg, central telephone; sequentially numbered, opaque, sealed envelopes), describing any steps to conceal the sequence until interventions are assigned                                                                                                                                                                                                    | 9              |
| 17 | concealment                                                         |     |                                                                                                                                                                                                                                                                                                                                                                                                              |                |
| 18 | mechanism                                                           |     |                                                                                                                                                                                                                                                                                                                                                                                                              |                |
| 19 |                                                                     |     |                                                                                                                                                                                                                                                                                                                                                                                                              |                |
| 20 | Implementation                                                      | 16c | Who will generate the allocation sequence, who will enrol participants, and who will assign participants to interventions                                                                                                                                                                                                                                                                                    | 9, 10          |
| 21 |                                                                     |     |                                                                                                                                                                                                                                                                                                                                                                                                              |                |
| 22 |                                                                     |     |                                                                                                                                                                                                                                                                                                                                                                                                              |                |
| 23 |                                                                     |     |                                                                                                                                                                                                                                                                                                                                                                                                              |                |
| 24 | Blinding (masking)                                                  | 17a | Who will be blinded after assignment to interventions (eg, trial participants, care providers, outcome assessors, data analysts), and how                                                                                                                                                                                                                                                                    | 2, 4, 14       |
| 25 |                                                                     |     |                                                                                                                                                                                                                                                                                                                                                                                                              |                |
| 26 |                                                                     |     |                                                                                                                                                                                                                                                                                                                                                                                                              |                |
| 27 |                                                                     | 17b | If blinded, circumstances under which unblinding is permissible, and procedure for revealing a participant's allocated intervention during the trial                                                                                                                                                                                                                                                         | 2, 4, 14       |
| 28 |                                                                     |     |                                                                                                                                                                                                                                                                                                                                                                                                              |                |
| 29 |                                                                     |     |                                                                                                                                                                                                                                                                                                                                                                                                              |                |
| 30 |                                                                     |     |                                                                                                                                                                                                                                                                                                                                                                                                              |                |
| 31 | <b>Methods: Data collection, management, and analysis</b>           |     |                                                                                                                                                                                                                                                                                                                                                                                                              |                |
| 32 |                                                                     |     |                                                                                                                                                                                                                                                                                                                                                                                                              |                |
| 33 | Data collection                                                     | 18a | Plans for assessment and collection of outcome, baseline, and other trial data, including any related processes to promote data quality (eg, duplicate measurements, training of assessors) and a description of study instruments (eg, questionnaires, laboratory tests) along with their reliability and validity, if known. Reference to where data collection forms can be found, if not in the protocol | 12, 13, 14, 15 |
| 34 | methods                                                             |     |                                                                                                                                                                                                                                                                                                                                                                                                              |                |
| 35 |                                                                     |     |                                                                                                                                                                                                                                                                                                                                                                                                              |                |
| 36 |                                                                     |     |                                                                                                                                                                                                                                                                                                                                                                                                              |                |
| 37 |                                                                     |     |                                                                                                                                                                                                                                                                                                                                                                                                              |                |
| 38 |                                                                     |     |                                                                                                                                                                                                                                                                                                                                                                                                              |                |
| 39 |                                                                     | 18b | Plans to promote participant retention and complete follow-up, including list of any outcome data to be collected for participants who discontinue or deviate from intervention protocols                                                                                                                                                                                                                    | 15             |
| 40 |                                                                     |     |                                                                                                                                                                                                                                                                                                                                                                                                              |                |
| 41 |                                                                     |     |                                                                                                                                                                                                                                                                                                                                                                                                              |                |
| 42 |                                                                     |     |                                                                                                                                                                                                                                                                                                                                                                                                              |                |

|    |                                 |     |                                                                                                                                                                                                                                                                                                                                       |            |
|----|---------------------------------|-----|---------------------------------------------------------------------------------------------------------------------------------------------------------------------------------------------------------------------------------------------------------------------------------------------------------------------------------------|------------|
| 1  | Data management                 | 19  | Plans for data entry, coding, security, and storage, including any related processes to promote data quality (eg, double data entry; range checks for data values). Reference to where details of data management procedures can be found, if not in the protocol                                                                     | 19, 21     |
| 2  |                                 |     |                                                                                                                                                                                                                                                                                                                                       |            |
| 3  |                                 |     |                                                                                                                                                                                                                                                                                                                                       |            |
| 4  |                                 |     |                                                                                                                                                                                                                                                                                                                                       |            |
| 5  | Statistical methods             | 20a | Statistical methods for analysing primary and secondary outcomes. Reference to where other details of the statistical analysis plan can be found, if not in the protocol                                                                                                                                                              | 16, 17, 18 |
| 6  |                                 |     |                                                                                                                                                                                                                                                                                                                                       |            |
| 7  |                                 |     |                                                                                                                                                                                                                                                                                                                                       |            |
| 8  |                                 | 20b | Methods for any additional analyses (eg, subgroup and adjusted analyses)                                                                                                                                                                                                                                                              | 18         |
| 9  |                                 |     |                                                                                                                                                                                                                                                                                                                                       |            |
| 10 |                                 | 20c | Definition of analysis population relating to protocol non-adherence (eg, as randomised analysis), and any statistical methods to handle missing data (eg, multiple imputation)                                                                                                                                                       | 17, 18     |
| 11 |                                 |     |                                                                                                                                                                                                                                                                                                                                       |            |
| 12 |                                 |     |                                                                                                                                                                                                                                                                                                                                       |            |
| 13 |                                 |     |                                                                                                                                                                                                                                                                                                                                       |            |
| 14 | <b>Methods: Monitoring</b>      |     |                                                                                                                                                                                                                                                                                                                                       |            |
| 15 |                                 |     |                                                                                                                                                                                                                                                                                                                                       |            |
| 16 | Data monitoring                 | 21a | Composition of data monitoring committee (DMC); summary of its role and reporting structure; statement of whether it is independent from the sponsor and competing interests; and reference to where further details about its charter can be found, if not in the protocol. Alternatively, an explanation of why a DMC is not needed | 20         |
| 17 |                                 |     |                                                                                                                                                                                                                                                                                                                                       |            |
| 18 |                                 |     |                                                                                                                                                                                                                                                                                                                                       |            |
| 19 |                                 |     |                                                                                                                                                                                                                                                                                                                                       |            |
| 20 |                                 |     |                                                                                                                                                                                                                                                                                                                                       |            |
| 21 |                                 |     |                                                                                                                                                                                                                                                                                                                                       |            |
| 22 |                                 | 21b | Description of any interim analyses and stopping guidelines, including who will have access to these interim results and make the final decision to terminate the trial                                                                                                                                                               | 20         |
| 23 |                                 |     |                                                                                                                                                                                                                                                                                                                                       |            |
| 24 |                                 |     |                                                                                                                                                                                                                                                                                                                                       |            |
| 25 | Harms                           | 22  | Plans for collecting, assessing, reporting, and managing solicited and spontaneously reported adverse events and other unintended effects of trial interventions or trial conduct                                                                                                                                                     | 13         |
| 26 |                                 |     |                                                                                                                                                                                                                                                                                                                                       |            |
| 27 |                                 |     |                                                                                                                                                                                                                                                                                                                                       |            |
| 28 | Auditing                        | 23  | Frequency and procedures for auditing trial conduct, if any, and whether the process will be independent from investigators and the sponsor                                                                                                                                                                                           | 19         |
| 29 |                                 |     |                                                                                                                                                                                                                                                                                                                                       |            |
| 30 |                                 |     |                                                                                                                                                                                                                                                                                                                                       |            |
| 31 |                                 |     |                                                                                                                                                                                                                                                                                                                                       |            |
| 32 | <b>Ethics and dissemination</b> |     |                                                                                                                                                                                                                                                                                                                                       |            |
| 33 |                                 |     |                                                                                                                                                                                                                                                                                                                                       |            |
| 34 | Research ethics approval        | 24  | Plans for seeking research ethics committee/institutional review board (REC/IRB) approval                                                                                                                                                                                                                                             | 20, 21     |
| 35 |                                 |     |                                                                                                                                                                                                                                                                                                                                       |            |
| 36 |                                 |     |                                                                                                                                                                                                                                                                                                                                       |            |
| 37 | Protocol amendments             | 25  | Plans for communicating important protocol modifications (eg, changes to eligibility criteria, outcomes, analyses) to relevant parties (eg, investigators, REC/IRBs, trial participants, trial registries, journals, regulators)                                                                                                      | 20, 21     |
| 38 |                                 |     |                                                                                                                                                                                                                                                                                                                                       |            |
| 39 |                                 |     |                                                                                                                                                                                                                                                                                                                                       |            |
| 40 |                                 |     |                                                                                                                                                                                                                                                                                                                                       |            |
| 41 |                                 |     |                                                                                                                                                                                                                                                                                                                                       |            |
| 42 |                                 |     |                                                                                                                                                                                                                                                                                                                                       |            |
| 43 |                                 |     |                                                                                                                                                                                                                                                                                                                                       |            |
| 44 |                                 |     |                                                                                                                                                                                                                                                                                                                                       |            |
| 45 |                                 |     |                                                                                                                                                                                                                                                                                                                                       |            |
| 46 |                                 |     |                                                                                                                                                                                                                                                                                                                                       |            |

|    |                               |     |                                                                                                                                                                                                                                                                                     |              |
|----|-------------------------------|-----|-------------------------------------------------------------------------------------------------------------------------------------------------------------------------------------------------------------------------------------------------------------------------------------|--------------|
| 1  | Consent or assent             | 26a | Who will obtain informed consent or assent from potential trial participants or authorised surrogates, and how (see Item 32)                                                                                                                                                        | 21           |
| 2  |                               |     |                                                                                                                                                                                                                                                                                     |              |
| 3  |                               |     |                                                                                                                                                                                                                                                                                     |              |
| 4  |                               | 26b | Additional consent provisions for collection and use of participant data and biological specimens in ancillary studies, if applicable                                                                                                                                               | 21           |
| 5  |                               |     |                                                                                                                                                                                                                                                                                     |              |
| 6  |                               |     |                                                                                                                                                                                                                                                                                     |              |
| 7  | Confidentiality               | 27  | How personal information about potential and enrolled participants will be collected, shared, and maintained in order to protect confidentiality before, during, and after the trial                                                                                                | 21           |
| 8  |                               |     |                                                                                                                                                                                                                                                                                     |              |
| 9  |                               |     |                                                                                                                                                                                                                                                                                     |              |
| 10 | Declaration of interests      | 28  | Financial and other competing interests for principal investigators for the overall trial and each study site                                                                                                                                                                       | 21           |
| 11 |                               |     |                                                                                                                                                                                                                                                                                     |              |
| 12 |                               |     |                                                                                                                                                                                                                                                                                     |              |
| 13 | Access to data                | 29  | Statement of who will have access to the final trial dataset, and disclosure of contractual agreements that limit such access for investigators                                                                                                                                     | 21           |
| 14 |                               |     |                                                                                                                                                                                                                                                                                     |              |
| 15 |                               |     |                                                                                                                                                                                                                                                                                     |              |
| 16 |                               |     |                                                                                                                                                                                                                                                                                     |              |
| 17 | Ancillary and post-trial care | 30  | Provisions, if any, for ancillary and post-trial care, and for compensation to those who suffer harm from trial participation                                                                                                                                                       | 21           |
| 18 |                               |     |                                                                                                                                                                                                                                                                                     |              |
| 19 |                               |     |                                                                                                                                                                                                                                                                                     |              |
| 20 | Dissemination policy          | 31a | Plans for investigators and sponsor to communicate trial results to participants, healthcare professionals, the public, and other relevant groups (eg, via publication, reporting in results databases, or other data sharing arrangements), including any publication restrictions | 2, 3, 20, 21 |
| 21 |                               |     |                                                                                                                                                                                                                                                                                     |              |
| 22 |                               |     |                                                                                                                                                                                                                                                                                     |              |
| 23 |                               |     |                                                                                                                                                                                                                                                                                     |              |
| 24 |                               | 31b | Authorship eligibility guidelines and any intended use of professional writers                                                                                                                                                                                                      | 23           |
| 25 |                               |     |                                                                                                                                                                                                                                                                                     |              |
| 26 |                               | 31c | Plans, if any, for granting public access to the full protocol, participant-level dataset, and statistical code                                                                                                                                                                     | 21           |
| 27 |                               |     |                                                                                                                                                                                                                                                                                     |              |
| 28 |                               |     |                                                                                                                                                                                                                                                                                     |              |
| 29 | <b>Appendices</b>             |     |                                                                                                                                                                                                                                                                                     |              |
| 30 |                               |     |                                                                                                                                                                                                                                                                                     |              |
| 31 | Informed consent materials    | 32  | Model consent form and other related documentation given to participants and authorised surrogates                                                                                                                                                                                  | S4           |
| 32 |                               |     |                                                                                                                                                                                                                                                                                     |              |
| 33 |                               |     |                                                                                                                                                                                                                                                                                     |              |
| 34 | Biological specimens          | 33  | Plans for collection, laboratory evaluation, and storage of biological specimens for genetic or molecular analysis in the current trial and for future use in ancillary studies, if applicable                                                                                      | 14           |
| 35 |                               |     |                                                                                                                                                                                                                                                                                     |              |
| 36 |                               |     |                                                                                                                                                                                                                                                                                     |              |

37 \*It is strongly recommended that this checklist be read in conjunction with the SPIRIT 2013 Explanation & Elaboration for important clarification on the items.  
 38 Amendments to the protocol should be tracked and dated. The SPIRIT checklist is copyrighted by the SPIRIT Group under the Creative Commons  
 39 “[Attribution-NonCommercial-NoDerivs 3.0 Unported](https://creativecommons.org/licenses/by-nc-nd/3.0/)” license.  
 40  
 41  
 42

**Online supplementary file S3 OVATION-65 ancillary studies**

| <b>Study title</b>                                                                                                                                         | <b>Investigators</b>                                                                         | <b>Primary objective</b>                                                                                              | <b>Secondary objective</b>                                                                                                                                                                                                                                         | <b>Funding</b>                                     |
|------------------------------------------------------------------------------------------------------------------------------------------------------------|----------------------------------------------------------------------------------------------|-----------------------------------------------------------------------------------------------------------------------|--------------------------------------------------------------------------------------------------------------------------------------------------------------------------------------------------------------------------------------------------------------------|----------------------------------------------------|
| Measuring baseline ascorbic acid levels in the OVATION-65 trial                                                                                            | MC Battista<br>NK Adhikari<br>F Lamontagne                                                   | Measure the association between baseline plasma ascorbic acid and markers of organ injury                             | Measure the association between baseline ascorbic acid and<br>1) hourly MAP to vasopressor dose ratio;<br>2) biomarkers of inflammation (IL-1 $\beta$ , TNF- $\alpha$ , C-reactive protein)<br>3) biomarkers of endothelial injury (thrombomodulin, angiotensin-2) | Lotte and John Hecht Memorial Foundation           |
| Urinary biomarkers of renal injury in the OVATION-65 trial: a Nested analysis of the urinary proteome                                                      | FM Boisvert<br>MC Battista<br>NK Adhikari<br>F Lamontagne                                    | Identify peptides and proteins expressed in the urine of OVATION-65 participants using a discovery proteomic approach | Measure the association between protein clusters and renal function                                                                                                                                                                                                | Université de Sherbrooke/<br>Merck Sharp and Dohme |
| Effects of catecholamine therapy on the immune system: unsuspected consequences of routine medical interventions and opportunities for individualized care | FM Boisvert<br>LH Tai<br>JL Parent<br>X Roucou<br>MC Battista<br>NK Adhikari<br>F Lamontagne | Evaluate the effects of exogenous catecholamines on plasma Th1/Th2 profiles (plasma cytokines and flow cytometry)     | Evaluate the effects of exogenous catecholamines on<br>1) Expression and activation of peripheral blood mononuclear cell adrenergic receptors;<br>2) Distinct proteomic signatures                                                                                 | Université de Sherbrooke/<br>Merck Sharp and Dohme |

**RESEARCH INFORMATION AND CONSENT FORM**

**Study Title:** The OVATION-65- Impact of permissive hypotension on end-organ damage in the elderly

**Study Number and Date:** MP-31-2018-1789

**Funding Agencies:** Centre de recherche du CHUS  
Université de Sherbrooke

**Principal Investigator:** Dr. François Lamontagne, Intensivist

**Co-Investigators:** Dr. Frédérick D'Aragon, Intensivist,  
Dr. Charles St-Arnaud, Intensivist  
Dr. Michaël Mayette, Intensivist,

**FOR INFORMATION**

**Monday through Friday, from 8 am and 4 pm, you can reach:**

Dr. François Lamontagne, Intensivist Tel.: 819-346-1110, ext. 74974  
Élaine Carbonneau, Research Coordinator Tel.: 819-346-1110, ext. 16208  
Marie-Hélène Masse, Research Coordinator Tel.: 819-346-1110, ext. 14173  
Marilène Ladouceur, Research Assistant Tel.: 819-346-1110, ext. 14169  
or dial "0" and ask the operator to call them on pager # 7125.

We are seeking your participation (or that of your family member) in a research study because you (or your family member) have been admitted to an intensive care unit and will need medication administered into your veins to raise your blood pressure. However, before you agree to participate, please take the time to read, understand and carefully consider the following information. If you agree to take part in this research study, you will be asked to sign the consent form at the end of this document and we will give you a signed copy for your own records.

This Information and Consent Form explains the goals, procedures, risks and inconveniences, and benefits of the study as well as providing the names of the people to reach if needed. This document may contain information or words that you do not understand. Please ask the study investigator or members of the study staff to answer your questions and explain any word or information you do not understand.

**NATURE AND GOALS OF THE RESEARCH STUDY**

This study aims to determine whether the target blood pressure used to adjust the dosage of the blood-pressure-increasing medication changes the evolution of participants treated in the Intensive Care Unit (ICU). Vasopressors are drugs that are given intravenously to increase the blood pressure of patients with diseases causing dangerous pressure drops that can be harmful to the organs of the body. When a doctor

1  
2 prescribes a vasopressor, he asks that the dose be adjusted to achieve a specific blood  
3 pressure. However, although vasopressors have been used for nearly a century, we still  
4 do not know whether it is preferable to try and normalize the blood pressure of our  
5 patients (which requires high doses of vasopressors) or tolerate a lower pressure (which  
6 is not normal, but requires smaller doses of drugs). The current practice is quite  
7 variable, some doctors preferring to increase the blood pressure, others preferring to  
8 restrict doses of these powerful drugs and tolerate a lower blood pressure  
9 (hypotension).  
10

11  
12 The goal of this study is to determine if tolerating a lower mean blood pressure  
13 (permissive hypotension) vs. usual blood pressure targets in hypotensive patients over  
14 65 years of age can reduce the risk of harm associated with more aggressive  
15 vasopressor therapy. The specific objectives are to evaluate: the effect of permissive  
16 hypotension on your health status after 6 months, the effects on markers of organ  
17 injury, including the heart, brain, kidneys, liver, intestine, and skeletal muscles as well  
18 as the effects on your immune system. We wish to recruit around 100 participants at the  
19 *CIUSSS de l'Estrie - CHUS* to be among the 200 participants needed for this study that  
20 will be carried out in several hospitals.  
21

22  
23 Your physician has determined that you are eligible to participate in our study and you  
24 have been selected as a participant because you are being (or will soon be) treated in  
25 the ICU and because you were prescribed vasopressor drugs.  
26

## 27 **RESEARCH STUDY PROCEDURES**

28 If you agree to participate in this study, you (or your family member) will be assigned to  
29 one of the following two groups: The first group includes participants who are being  
30 given vasopressors for an average blood pressure of 60-65 mmHg (limiting the amount  
31 of vasopressors given); the second group includes participants who are receiving  
32 vasopressors following usual care. Your assignment to one of these two groups was  
33 determined randomly by a computer that will not retain information about you. The odds  
34 of being assigned to either group were 50% (1 in 2 chances or half-and-half). The  
35 treating team will be aware of which group you have been assigned to.  
36  
37

38 As a study participant, you will receive vasopressors to maintain your average blood  
39 pressure at the level of your assigned group. These pressure targets will remain the  
40 same throughout your treatment with this type of medication (vasopressors) until you  
41 are discharged from hospital or up to 28 days from the beginning of your participation,  
42 whichever event comes first. Also, on days 1, 3 and 7 of participation (or when you are  
43 discharged from the intensive care unit), your nurse will collect 30 ml of blood (6  
44 teaspoons) as well as urine samples while taking the blood samples required for your  
45 medical follow-up. We will collect a little more volume than what is needed in order to  
46 compensate for unexpected losses that may arise during laboratory testing. These  
47 samples will enable us to measure certain biomarkers in your blood and in your urine  
48 that help assess the function of your heart, kidneys, muscles, brain and liver as well as  
49 your immune system. These biomarkers are already known to be useful in clinical  
50 studies and are not genetic biomarkers. During your hospital stay, we will monitor your  
51 progress to see if your organs are functioning well, if you develop other health problems  
52 and how long you will stay in the ICU and hospital. Your medical chart will be reviewed,  
53 by the investigator and the research team as long as you remain in the study. Blood test  
54 results and procedures present in your medical record will be collected for the study.  
55  
56  
57  
58  
59



1  
2 After you are discharged from the hospital, you will be contacted by phone 6 monthss  
3 after the start of your participation in the study. Your contact information will be provided  
4 to the coordinating research team.  
5

### 6 7 **FUTURE ANALYSES**

8 Once the biomarker analyses have been performed as part of this study, it is possible  
9 that part of your samples may be unused. We wish to use the remainder of your  
10 samples (blood and urine) in order to answer additional questions concerning the  
11 impact of vasopressors on blood pressure targets that may arise in future. For example,  
12 we could measure a new, as yet undefined, biomarker. Only the remainder of your  
13 samples will be used and no other additional sample will be collected. At the end of the  
14 study, if some of the samples remain unused, they will be destroyed unless you agree  
15 to biobanking. A separate consent form will be presented for biobanking.  
16  
17

### 18 19 **RISKS ASSOCIATED WITH PARTICIPATION IN THIS RESEARCH STUDY**

20 Vasopressors used in this study and that you have received or may still be receiving,  
21 are approved in Canada and commonly used in the ICUs of all hospitals. The blood  
22 pressure targets we aim for in this study are also part of current medical practices.

23 Since your health condition required treatment with vasopressors, and continues to  
24 require treatment at this time, to our knowledge, you are exposed to the same risks,  
25 whether or not you participate in this study.  
26  
27

### 28 29 **INCONVENIENCES ASSOCIATED WITH PARTICIPATION IN THE STUDY**

30 Other than the risks described above, you (or your family member) shouldn't experience  
31 any other inconveniences.  
32

### 33 34 **BENEFITS ASSOCIATED WITH YOUR PARTICIPATION IN THE RESEARCH STUDY**

35 You (or your family member) will not personally benefit from your participation in this  
36 research study. However, the findings from this study may help increase our knowledge  
37 of pressure targets, vasopressors and biomarkers. The information obtained through  
38 this study could be useful to other patients in the future.  
39

### 40 41 **ALTERNATIVES TO YOUR PARTICIPATION IN THIS RESEARCH STUDY**

42 You (or to your family member) do not have to participate in this research study to be  
43 treated for your disease.  
44

### 45 46 **VOLUNTARY PARTICIPATION AND THE RIGHT TO WITHDRAW**

47 Your participation in this research study is voluntary. Therefore, you may refuse to  
48 participate. You can also withdraw from the study at any time, without providing a  
49 reason, by informing the study investigator or one of his assistants.

50 Your decision not to participate in the study or to withdraw from it, will have no impact  
51 on the quality of care and services you (or your family member) are entitled to or on  
52 your relationship with the investigator and other stakeholders.

53 The study investigator, the funding agency or the Research Ethics Board may put an  
54 end your participation in the study without your consent. This may happen if new  
55 scientific developments show that participation is no longer in your interest; if the study  
56 investigator believes it is in your best interest; or if there are administrative reasons to  
57 terminate the study.  
58

1  
2 If you withdraw or are withdrawn from the study, the information and material already  
3 collected during the course of the study will be stored, analyzed or used to ensure the  
4 integrity of the study.  
5

6 Any new study findings that could influence your decision to remain in the research  
7 study will be shared with you as soon as possible.  
8

### 9 **CONFIDENTIALITY**

10 While you take part in this research study, the study investigator and study staff will  
11 collect and record information about you in a study file. Only the information needed to  
12 meet the scientific goals of the study will be collected.  
13

14 This information could include data taken from your medical record concerning your  
15 past and present medical history, your lifestyle and the test results, exams and  
16 procedures you will undergo during the study.  
17

18 All the information collected during the study will remain strictly confidential to the extent  
19 provided by law. To protect your identity and privacy, you will be identified by an  
20 alphanumeric code. The key linking your identity and your research file will be kept in a  
21 safe place by the study investigator.  
22

23 To ensure your safety, a mention of your participation in this research project will be  
24 included in your medical file. Therefore, any person or company to whom you will give  
25 access to your medical file will have access to this information.  
26

27 Your full name and your phone number will be transmitted to a qualified person of the  
28 coordinating center of the study in order to allow this person to contact you in 6 months  
29 by phone. This personal information will allow a direct identification. This information will  
30 be kept in security and confidentiality will be preserved by the qualified person and  
31 destroyed at the end of the follow-up.  
32

33 Study results will be stored by the study investigator for 25 years.  
34

35 Study results may be published in medical journals or discussed at scientific meetings,  
36 but it will be impossible to identify participants.  
37

38 For monitoring and control purposes, your study file and medical records may be  
39 examined by a representative of the Research Ethics Board or of the institution or by a  
40 person mandated by a regulatory authority. All of these individuals and organizations  
41 adhere to confidentiality policies.  
42

43 You have the right to consult your study file at any time in order to verify the information  
44 gathered and to have it corrected, if necessary, for as long as this information is  
45 available to the study investigator or the institution. However, some of this information  
46 may be made available to you only once the study has ended, in order to protect the  
47 scientific integrity of the study.  
48  
49

### 50 **COMPENSATION**

51 You (or your family member) will not receive any compensation for expenses and  
52 inconveniences incurred due to your participation in this research study.  
53  
54  
55  
56  
57  
58  
59  
60

**SHOULD YOU SUFFER ANY HARM**

Should you suffer any harm due to your participation in this research study, you will be provided with all the necessary care and services, at no cost to you.

By agreeing to take part in this study, you are not waiving any of your legal rights nor discharging the study investigators, the sponsor or the institution where this research study is being conducted of their civil liability and professional responsibilities.

**FUNDING OF THE RESEARCH STUDY**

The study investigator has received funding from the grant agency to carry out this study.

**CONTACT PERSONS**

If you have any questions regarding your participation in this research study, please refer to the box on page 1.

If you have any questions regarding your rights as a participant in this study, if you have any comments or you wish to file a complaint, you may contact the *Bureau des plaintes et de la qualité des services of the CIUSSS de l'Estrie-CHUS* at the following number: 1-866-917-7903.

**MONITORING OF ETHICAL ASPECTS OF THE STUDY**

The *Comité d'éthique de la recherche du CIUSSS de l'Estrie - CHUS* has approved this study and is responsible for monitoring it at all participating institutions throughout Québec's health and social service network.

If you wish to reach a member of the Research Ethics Board (REB), please contact the *Service de soutien à l'éthique de la recherche du CIUSSS de l'Estrie - CHUS* at the following number: 819-346-1110, ext. 12856.

---

The OVATION-65- Impact of permissive hypotension on end-organ damage in the elderly

---

**CONSENT**

I declare that I have read this Information and Consent Form. I declare that the research study has been explained to me, that my questions were answered to my satisfaction and that I was given sufficient time for consideration and to make a decision. Upon reflection, I agree to participate in this research study under the conditions stated therein.

I agree that the remainder of the samples may be used for additional analyses that may arise during the study (future analyses).  YES  NO

---

|                                              |                          |      |
|----------------------------------------------|--------------------------|------|
| Name of participant<br><i>(please print)</i> | Signature of participant | Date |
|----------------------------------------------|--------------------------|------|

I have explained the research study and this Information and Consent Form and I have answered all of his/her questions.

---

|                                                              |                                          |      |
|--------------------------------------------------------------|------------------------------------------|------|
| Name of person<br>obtaining consent<br><i>(please print)</i> | Signature of person<br>obtaining consent | Date |
|--------------------------------------------------------------|------------------------------------------|------|

**CONSENT FROM LEGAL REPRESENTATIVE (SUDDEN INCAPACITY)**

Because Mr./Mrs. \_\_\_\_\_ has suddenly become incapable of giving consent for the hereinafter mentioned reason, the Civil Code of Québec allows you to give consent for him/her as his/her \_\_\_\_\_ (indicate your relationship with the participant).

As soon as Mr./Mrs. \_\_\_\_\_ has sufficiently recovered, he/she will be asked to sign his/her own consent form to indicate whether he/she wants to continue taking part in this study.

**REASON FOR THE PARTICIPANT NOT BEING ABLE TO GIVE CONSENT**

By signing this page, I confirm that I have read the information in this Consent Form. I acknowledge that the study has been explained to me, that all of my questions have been answered and that I was given enough time to make a decision. I voluntarily give my consent so that Mr./Mrs. \_\_\_\_\_ can participate in this study.

I also agree that the remainder of the samples may be used for additional analyses that may arise during the study (future analyses).  YES  NO

| Name of legal representative<br>(please print) | Signature of legal representative | Date |
|------------------------------------------------|-----------------------------------|------|
|------------------------------------------------|-----------------------------------|------|

I have explained the research study and this Consent Form to the participant's legal representative. I have answered all of his/her questions.

| Name of person<br>obtaining consent<br>(please print) | Signature of person<br>obtaining consent | Date |
|-------------------------------------------------------|------------------------------------------|------|
|-------------------------------------------------------|------------------------------------------|------|

**CONSENT FROM THE LEGAL REPRESENTATIVE OR CAREGIVER SUPPORTING THE PARTICIPATION OF THE PERMANENTLY INCAPABLE PARTICIPANT (PERMANENT INCAPACITY)**

I declare that I have read this Information and Consent Form. I declare that the research study has been explained to me, that my questions were answered to my satisfaction and that I was given sufficient time for consideration and to make a decision.

I agree that \_\_\_\_\_ can participate in this research study under the conditions stated therein. I will receive a signed and dated copy of this Information and Consent Form.

I also agree that the remainder of the samples may be used for additional analyses that may arise during the study (future analyses).  YES  NO

If the incapacitated participant is represented:

\_\_\_\_\_  
Name and signature of the legal representative (representative, curator or mandatary) Date

If the incapacitated participant is not represented by a legal representative:

\_\_\_\_\_  
Name and signature of the spouse, failing which, name of next-of-kin or name of a significant person Date

I have explained the research study and this Consent Form to the participant's legal representative. I have answered all his/her questions.

\_\_\_\_\_  
Name of person obtaining consent (please print) Signature of person obtaining consent Date

**PHONE CONSENT**

(For the participant who is suddenly or permanently incapacitated)

Because Mr./Mrs. \_\_\_\_\_ is incapable of giving consent for the hereinafter mentioned reason,

REASON FOR THE PARTICIPANT NOT BEING ABLE TO GIVE CONSENT

\_\_\_\_\_

I have explained the research study and this Consent Form to the participant's legal representative. I have answered all his/her questions.

The representative, Mr./Mrs. \_\_\_\_\_  
 Name of the legal representative (representative, curator or mandatary)  
 Name of the spouse or next-of-kin or  
 Name of the significant person

has given consent by phone on \_\_\_\_\_ at \_\_\_\_\_  
 Date Hour

The representative also agrees that the remainder of the samples may be used for additional analyses that may arise during the study (future analyses).  YES  NO

\_\_\_\_\_  
 Name of person  
 obtaining consent  
 (please print)

\_\_\_\_\_  
 Signature of person  
 obtaining consent

\_\_\_\_\_  
 Date

## APPENDIX 1: GENETIC PHASE

**(PLEASE NOTE: This part of the consent should not appear in the patient's medical file)**

We invite you to participate in the genetic component of this study. This phase is optional. You may refuse this proposal and still participate in the main phase of the project.

Please note that all sections of the main consent form apply to this appendix as well.

Genetics focuses on cells in the human body that contain a type of molecule called deoxyribonucleic acid commonly referred to as "DNA". Your DNA is contained in the inherited genes that control your entire body's growth, development and functions. For instance, some genes determine the colour of your eyes or hair. DNA presents a wide array of differences or variations from one person to another. These variations may affect the risk of contracting a disease (or not) or the way individuals respond differently to a drug. The OVATION-65 project also includes a genetic sub-study focusing on the analysis of certain genes (genetics) and certain phenomena present in your environment that modify your DNA (epigenetics). These tests can be performed on the cells in your blood.

The markers of the heart, brain, kidneys, liver, intestine and skeletal muscles that we are interested in measuring as part of the OVATION-65 study as well as the molecules (receptors) that enable the vasopressors to act (beta-adrenergic receptors) on the cells of different organs are determined in part by genes. Thus, in order to better understand how to reduce organ damage related to medication (vasopressors) received during intensive care unit admissions, we propose to study the DNA as well as the variations around this DNA (called epigenetic variations) of patients included in OVATION-65. Our goal is to demonstrate that modifications in the DNA of studied markers are associated with the levels of these same blood or urine markers, which inform us on the function/involvement of the targeted organ.

If you agree to participate, we will use a portion of the samples already collected as part of the main project and an additional sample (approximately 2 teaspoons) to conduct our genetic analyses.

### FUTURE ANALYSIS

Once the genetic analyses have been conducted, it is possible that a portion of the samples will remain unused. We would like to use the remainder of your samples to answer additional research questions that might arise during the course of the study. Only the remainder of your samples will be used and no other additional samples will be taken. At the end of the study, if some samples remain unused, they will be destroyed unless you agree to biobanking. Another consent form will be presented for biobanking.



## **SOCIO-ECONOMIC RISKS ASSOCIATED WITH PARTICIPATION IN THIS PHASE OF THE STUDY**

One of the risks associated with genetic analyses is related to the disclosure of results or of your participation to third parties. Protection against genetic discrimination is not currently well defined in Canadian and Québec legislation. Thus, we cannot fully guarantee that your participation in a genetics research project will not have an impact on your chances of getting certain jobs, or of getting insurance coverage (life insurance, disability or health) for you or for members of your family.

However, as researchers, we are committed not to disclose information related to genetic results to any third party. Your results will not be made available to third parties such as an employer, a government agency, an insurer or an educational institution. This also applies to your spouse, other members of your family and your doctor. Furthermore, rest assured that no data related to any genetic results will be included in your hospital record.

## **VOLUNTARY PARTICIPATION AND THE RIGHT TO WITHDRAW FROM THE GENETIC PHASE OF THE PROJECT**

Your participation in the genetic phase of the project is voluntary. Therefore, you may refuse to participate. You may also withdraw your consent from the genetic phase of this research project at any time. Just call the ICU research team at 346-1110 ext. 14171.

Your decision to refuse to participate in this sub-study of the project will have no impact on the quality of the care that will be provided to you or on your relationship with the healthcare team.

If you decide to terminate your participation in the genetic sub-study after providing a sample, you must notify the research team that will then destroy your sample. If your sample has already been tested and the results are already included in an analysis or publication, it will not be possible to remove this information. However, the rest of your sample will be destroyed and no further analysis will be done on your sample.

## **CONFIDENTIALITY**

### Identification:

In order to protect your identity, your samples will be identified by a unique code. Your name and your file number will not appear on the samples. The study investigator will keep a list of patients with the code numbers to identify them. This list is kept under lock and key in the research nurse's office and will not be disclosed under any circumstances.

### Storage and destruction of samples:

Your samples will be kept in the principal investigator's freezers until the end of the study, unless you agree to biobanking. Another consent form will be presented to this end. The principal investigator is responsible for the destruction of samples.

## **COMMUNICATION OF RESULTS**

Your participation and the results of the genetic analysis conducted on your samples will not be disclosed to you or to your doctor.

**MARKETING POSSIBILITIES / WAIVER**

Your participation in the genetic phase of this project could lead to the creation of commercial or other products that could potentially be protected by patents or other intellectual property rights. However, you will not receive any financial benefits.

**CONSENT (GENETIC SUB-STUDY)**

I declare that I have read this Appendix (genetic sub-study). I acknowledge that this sub-study of the project was explained to me, that all my questions were answered and that I was given the necessary time to make a decision.

I freely and willingly consent to participate in the **genetic sub-study** of this project:

I also accept that the remainder of my samples may be used for **additional genetic analyses** that may arise during the course of this study (future analysis):

YES       NO

|                                            |                          |      |
|--------------------------------------------|--------------------------|------|
| Name of participant name<br>(please print) | Signature of participant | Date |
|--------------------------------------------|--------------------------|------|

I have explained the genetic sub-study and this Consent Form to the participant, and I answered all his/her questions.

|                                                       |                                          |      |
|-------------------------------------------------------|------------------------------------------|------|
| Name of person<br>obtaining consent<br>(please print) | Signature of person<br>obtaining consent | Date |
|-------------------------------------------------------|------------------------------------------|------|

1  
2  
3 **CONSENT (GENETIC SUB-STUDY)**  
4 **FROM THE LEGAL REPRESENTATIVE (SUDDEN INCAPACITY)**  
5

6 Because Mr./Mrs. \_\_\_\_\_ has suddenly become incapable of giving  
7 consent for the hereinafter mentioned reason, the Civil Code of Québec allows you to  
8 give consent for him/her as his/her \_\_\_\_\_ (indicate your  
9 relationship with the participant) to participate in the **genetic sub-study** of the project.  
10

11 As soon as Mr./Mrs. \_\_\_\_\_ has sufficiently recovered, he/she will  
12 be asked to sign his/her own consent form to indicate whether he/she wants to continue  
13 taking part in this sub-study of the study.  
14  
15

16 REASON FOR THE PARTICIPANT NOT BEING ABLE TO GIVE CONSENT  
17  
18  
19

20  
21 By signing this page, I confirm that I have read the information in this Consent Form. I  
22 acknowledge that the **genetic sub-study** of the project has been explained to me, that  
23 all of my questions have been answered and that I was given enough time to make a  
24 decision.  
25

26  
27 I voluntarily give my consent so that Mr./Mrs. \_\_\_\_\_ can participate in  
28 the genetic sub study.  
29

30 I also agree that the remainder of the samples may be used for **additional genetic**  
31 **analyses** that may arise during the study (future analyses).  YES  NO  
32  
33  
34  
35

36 \_\_\_\_\_  
37 Name of legal representative      Signature of legal representative      Date  
38 *(please print)*

39  
40  
41 I have explained all relevant aspects of the genetic sub-study of this project to the  
42 participant's legal representative and I have answered all his/her questions.  
43  
44

45 \_\_\_\_\_  
46 Name of person      Signature of person      Date  
47 obtaining consent      obtaining consent  
48 *(please print)*  
49  
50  
51  
52  
53  
54  
55  
56  
57  
58  
59

1  
2  
3 **CONSENT (GENETIC SUB-STUDY)**  
4 **FROM LEGAL REPRESENTATIVE OR CAREGIVER (PERMANENT INCAPACITY)**  
5

6  
7 I confirm that I have read the information in this Consent Form. I acknowledge that the  
8 genetic sub-study of the project has been explained to me, that all of my questions have  
9 been answered and that I was given enough time to make a decision.  
10

11  
12 I agree that \_\_\_\_\_ can participate in this **genetic sub study** under the  
13 conditions stated therein. I will receive a signed and dated copy of this Information and  
14 Consent Form.  
15

16  
17 I also agree that the remainder of the samples may be used for **additional genetic**  
18 **analyses** that may arise during the study (future analyses).  YES  NO  
19  
20

21  
22 If the participant is represented:  
23  
24

25  
26 \_\_\_\_\_  
27 Name and signature of the legal representative Date  
28 (representative, curator or mandatary)  
29

30  
31 If the incapacitated participant is not represented by a legal representative:  
32  
33

34  
35 \_\_\_\_\_  
36 Name and signature of the spouse, Date  
37 failing which, name of the next-of-kin or  
38 name of the significant person  
39  
40

41  
42 I have explained the research study and this Consent Form to the participant's legal  
43 representative. I have answered all his/her questions.  
44  
45

46  
47 \_\_\_\_\_  
48 Name of person Signature of person Date  
49 obtaining consent obtaining consent  
50 (please print)  
51  
52  
53  
54  
55  
56  
57  
58  
59

**PHONE CONSENT (GENETIC SUB-STUDY)**

(For the participant who is suddenly or permanently incapacitated)

Because Mr./Mrs. \_\_\_\_\_ is incapable of giving consent for the hereinafter mentioned reason.

REASON FOR THE PARTICIPANT NOT BEING ABLE TO GIVE CONSENT

\_\_\_\_\_

I have explained the genetic sub study and this Consent Form to the legal representative using the phone script and I have answered all his/her questions.

The representative, Mr./Mrs. \_\_\_\_\_

Name of the legal representative (representative, curator or mandatary)  
Name of the spouse or of the next-of-kin or  
Name of the significant person

has given consent by phone on \_\_\_\_\_ at \_\_\_\_\_

Date Time

The representative also agrees that the remainder of the samples may be used for **additional genetic analyses** that might arise during the study (future analyses).

**YES**  **NO**

|                                                              |                                          |               |
|--------------------------------------------------------------|------------------------------------------|---------------|
| Name of person<br>obtaining consent<br><i>(please print)</i> | Signature of person<br>obtaining consent | Date and time |
|--------------------------------------------------------------|------------------------------------------|---------------|

# BMJ Open

## Optimal VAsopressor Titration in patients 65 years and older (OVATION-65) – protocol and statistical analysis plan for a randomized clinical trial

|                               |                                                                                                                                                                                                                                                                                                                                                                                                                                                                                                                                                                                                                                                                                                                                                                                                                                                                                                                                                                                                                                                                                                                                                                                                                                                                                                                                                                                                                                                                                                                                                                                                                                                                                                                                                                                                                                                                                                                                                                                                                                                                                                                                                                                                                                                                                                                                                                                                                                |
|-------------------------------|--------------------------------------------------------------------------------------------------------------------------------------------------------------------------------------------------------------------------------------------------------------------------------------------------------------------------------------------------------------------------------------------------------------------------------------------------------------------------------------------------------------------------------------------------------------------------------------------------------------------------------------------------------------------------------------------------------------------------------------------------------------------------------------------------------------------------------------------------------------------------------------------------------------------------------------------------------------------------------------------------------------------------------------------------------------------------------------------------------------------------------------------------------------------------------------------------------------------------------------------------------------------------------------------------------------------------------------------------------------------------------------------------------------------------------------------------------------------------------------------------------------------------------------------------------------------------------------------------------------------------------------------------------------------------------------------------------------------------------------------------------------------------------------------------------------------------------------------------------------------------------------------------------------------------------------------------------------------------------------------------------------------------------------------------------------------------------------------------------------------------------------------------------------------------------------------------------------------------------------------------------------------------------------------------------------------------------------------------------------------------------------------------------------------------------|
| Journal:                      | <i>BMJ Open</i>                                                                                                                                                                                                                                                                                                                                                                                                                                                                                                                                                                                                                                                                                                                                                                                                                                                                                                                                                                                                                                                                                                                                                                                                                                                                                                                                                                                                                                                                                                                                                                                                                                                                                                                                                                                                                                                                                                                                                                                                                                                                                                                                                                                                                                                                                                                                                                                                                |
| Manuscript ID                 | bmjopen-2020-037947.R1                                                                                                                                                                                                                                                                                                                                                                                                                                                                                                                                                                                                                                                                                                                                                                                                                                                                                                                                                                                                                                                                                                                                                                                                                                                                                                                                                                                                                                                                                                                                                                                                                                                                                                                                                                                                                                                                                                                                                                                                                                                                                                                                                                                                                                                                                                                                                                                                         |
| Article Type:                 | Protocol                                                                                                                                                                                                                                                                                                                                                                                                                                                                                                                                                                                                                                                                                                                                                                                                                                                                                                                                                                                                                                                                                                                                                                                                                                                                                                                                                                                                                                                                                                                                                                                                                                                                                                                                                                                                                                                                                                                                                                                                                                                                                                                                                                                                                                                                                                                                                                                                                       |
| Date Submitted by the Author: | 29-May-2020                                                                                                                                                                                                                                                                                                                                                                                                                                                                                                                                                                                                                                                                                                                                                                                                                                                                                                                                                                                                                                                                                                                                                                                                                                                                                                                                                                                                                                                                                                                                                                                                                                                                                                                                                                                                                                                                                                                                                                                                                                                                                                                                                                                                                                                                                                                                                                                                                    |
| Complete List of Authors:     | <p>Masse, Marie-Hélène ; Centre de recherche du Centre hospitalier universitaire de Sherbrooke, Critical Care<br/> Battista, Marie-Claude; Université de Sherbrooke, Medicine; Centre de recherche du Centre hospitalier universitaire de Sherbrooke<br/> Wilcox, M. Elizabeth; University of Toronto, Interdepartmental Division of Critical Care Medicine; University Health Network, Medicine<br/> Pinto, Ruxandra; Sunnybrook Health Sciences Centre, Critical Care Medicine<br/> Marinoff, Nicole; Sunnybrook Health Sciences Centre, Critical Care Medicine<br/> D'Aragon, Frédérick; Université de Sherbrooke, Anesthesiology; Centre de Recherche du Centre hospitalier universitaire de Sherbrooke,<br/> St-Arnaud, Charles; Université de Sherbrooke, Medicine; Centre de Recherche du Centre hospitalier universitaire de Sherbrooke<br/> Mayette, Michael; Université de Sherbrooke, Medicine; Centre de Recherche du Centre hospitalier universitaire de Sherbrooke<br/> Leclair, Marc-André ; Université de Sherbrooke, Medicine<br/> Quiroz Martinez, Hector; Université de Sherbrooke, Medicine<br/> Grondin-Beaudoin, Brian; Université de Sherbrooke, Medicine<br/> Poulin, Yannick; Université de Sherbrooke, Medicine<br/> Carbonneau, Éline ; Centre de recherche du Centre hospitalier universitaire de Sherbrooke, Critical Care<br/> Seely, Andrew; University of Ottawa, Departments of Surgery and Critical Care Medicine; Ottawa Hospital Research Institute<br/> Watpool, Irene; Ottawa Hospital Research Institute, Critical Care<br/> Porteous, Rebecca; Ottawa Hospital Research Institute, Critical Care<br/> Chassé, Michael; Université de Montréal, Medicine; Centre de Recherche du CHUM<br/> Lebrasseur, Martine; Centre de Recherche du CHUM, Critical Care<br/> Lauzier, François; Centre de recherche du CHUQ, Population Health and Optimal Health Practices Research Unit; Université Laval<br/> Turgeon, Alexis; Centre de recherche du CHUQ, Population Health and Optimal Health Practice Research Unit; Université Laval<br/> Bellemare, David; Centre de recherche du CHUQ, Population Health and Optimal Health Practice Research Unit; Université Laval<br/> Mehta, Sangeeta ; University of Toronto, Interdepartmental Division of Critical Care Medicine; Sinai Health System, Medicine<br/> Charbonney, Emmanuel; Université de Montréal Faculté de médecine, Medicine</p> |

|                                 |                                                                                                                                                                                                                                                                                                                                                                                                                                                                                                                                                                                         |
|---------------------------------|-----------------------------------------------------------------------------------------------------------------------------------------------------------------------------------------------------------------------------------------------------------------------------------------------------------------------------------------------------------------------------------------------------------------------------------------------------------------------------------------------------------------------------------------------------------------------------------------|
|                                 | Belley-Cote, Emilie; McMaster University, Department of Medicine, Division of Cardiology; Population Health Research Institute<br>Botton, Édouard; no institutional affiliation<br>Cohen, Dian; no institutional affiliation<br>Lamontagne, Francois; Universite de Sherbrooke, Medicine; Centre de recherche du Centre hospitalier universitaire de Sherbrooke<br>Adhikari, Neill; University of Toronto, Interdepartmental Division of Critical Care Medicine and Institute for Health Policy, Management, and Evaluation ; Sunnybrook Health Sciences Centre, Critical Care Medicine |
| <b>Primary Subject Heading</b>: | Intensive care                                                                                                                                                                                                                                                                                                                                                                                                                                                                                                                                                                          |
| Secondary Subject Heading:      | Cardiovascular medicine, Pharmacology and therapeutics                                                                                                                                                                                                                                                                                                                                                                                                                                                                                                                                  |
| Keywords:                       | Adult intensive & critical care < ANAESTHETICS, Clinical trials < THERAPEUTICS, Clinical chemistry < PATHOLOGY                                                                                                                                                                                                                                                                                                                                                                                                                                                                          |
|                                 |                                                                                                                                                                                                                                                                                                                                                                                                                                                                                                                                                                                         |

SCHOLARONE™  
Manuscripts

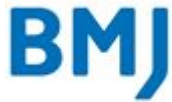

I, the Submitting Author has the right to grant and does grant on behalf of all authors of the Work (as defined in the below author licence), an exclusive licence and/or a non-exclusive licence for contributions from authors who are: i) UK Crown employees; ii) where BMJ has agreed a CC-BY licence shall apply, and/or iii) in accordance with the terms applicable for US Federal Government officers or employees acting as part of their official duties; on a worldwide, perpetual, irrevocable, royalty-free basis to BMJ Publishing Group Ltd ("BMJ") its licensees and where the relevant Journal is co-owned by BMJ to the co-owners of the Journal, to publish the Work in this journal and any other BMJ products and to exploit all rights, as set out in our [licence](#).

The Submitting Author accepts and understands that any supply made under these terms is made by BMJ to the Submitting Author unless you are acting as an employee on behalf of your employer or a postgraduate student of an affiliated institution which is paying any applicable article publishing charge ("APC") for Open Access articles. Where the Submitting Author wishes to make the Work available on an Open Access basis (and intends to pay the relevant APC), the terms of reuse of such Open Access shall be governed by a Creative Commons licence – details of these licences and which [Creative Commons](#) licence will apply to this Work are set out in our licence referred to above.

Other than as permitted in any relevant BMJ Author's Self Archiving Policies, I confirm this Work has not been accepted for publication elsewhere, is not being considered for publication elsewhere and does not duplicate material already published. I confirm all authors consent to publication of this Work and authorise the granting of this licence.



1  
2  
3 Optimal VAsopressor TitraTION in patients 65 years and older (OVATION-65) – protocol  
4 and statistical analysis plan for a randomized clinical trial  
5

6 Marie-Hélène Masse, Marie-Claude Battista, M. Elizabeth Wilcox, Ruxandra Pinto, Nicole  
7 Marinoff, Frédérick D’Aragon, Charles St-Arnaud, Michael Mayette, Marc-André Leclair,  
8 Hector Quiroz Martinez, Brian Grondin-Beaudoin, Yannick Poulin, Éline Carbonneau,  
9 Andrew JE Seely, Irene Watpool, Rebecca Porteous, Michaël Chassé, Martine Lebrasseur,  
10 François Lauzier, Alexis Turgeon, David Bellemare, Sangeeta Mehta, Emmanuel  
11 Charbonney, Émilie Belley-Côté, Édouard Botton, Dian Cohen, François Lamontagne\*†,  
12 Neill KJ Adhikari\*†, on behalf of the Canadian Critical Care Trials Group  
13  
14

15  
16 Masse: Critical Care, Centre de recherche du Centre hospitalier universitaire de Sherbrooke,  
17 Sherbrooke, QC, Canada (marie-helene.masse3@usherbrooke.ca)

18 Battista: Department of Medicine, Université de Sherbrooke, and Centre de recherche du Centre  
19 hospitalier universitaire de Sherbrooke, Sherbrooke, QC, Canada (marie-  
20 claudette.battista@usherbrooke.ca)

21 Wilcox: Interdepartmental Division of Critical Care Medicine, University of Toronto, and Department  
22 of Medicine, University Health Network, Toronto, ON, Canada (elizabeth.wilcox@utoronto.ca)

23 Pinto: Department of Critical Care Medicine, Sunnybrook Health Sciences Centre, Toronto, ON,  
24 Canada (ruxandra.pinto@sunnybrook.ca)

25 Marinoff: Department of Critical Care Medicine, Sunnybrook Health Sciences Centre, Toronto, ON,  
26 Canada (nicole.marinoff@sunnybrook.ca)

27 D’Aragon: Department of Anesthesiology, Université de Sherbrooke, and Centre de recherche du  
28 Centre hospitalier universitaire de Sherbrooke, Sherbrooke, QC, Canada  
29 (frederick.daragon@usherbrooke.ca)

30 St-Arnaud: Université de Sherbrooke, Department of Medicine, and Centre de recherche du Centre  
31 hospitalier universitaire de Sherbrooke, Sherbrooke, QC, Canada (Charles.St-  
32 Arnaud@USherbrooke.ca)

33 Mayette: Department of Medicine, Université de Sherbrooke, and Centre de recherche du Centre  
34 hospitalier universitaire de Sherbrooke, Sherbrooke, QC, Canada (michael.mayette@usherbrooke.ca)

35 Leclair: Department of Medicine, Université de Sherbrooke, Sherbrooke, QC, Canada (Marc-  
36 Andre.Leclair@USherbrooke.ca)

37 Quiroz Martinez: Department of Medicine, Université de Sherbrooke, Sherbrooke, QC, Canada  
38 (Hector.Quiroz.Martinez@USherbrooke.ca)

39 Grondin-Beaudoin: Department of Medicine, Université de Sherbrooke, Sherbrooke, QC, Canada  
40 (Brian.Grondin.Beaudoin@USherbrooke.ca)

41 Poulin: Department of Medicine, Université de Sherbrooke, Sherbrooke, QC, Canada  
42 (yannick.poulin@usherbrooke.ca)

43 Carbonneau: Critical Care, Centre de recherche du Centre hospitalier universitaire de Sherbrooke,  
44 Sherbrooke, QC, Canada (elaine.carbonneau.ciussse-chus@ssss.gouv.qc.ca)

45 Seely: Departments of Surgery and Critical Care Medicine, University of Ottawa, and Ottawa Hospital  
46 Research Institute, Ottawa, ON, Canada (aseely@toh.ca)

47 Watpool: Critical Care, Ottawa Hospital Research Institute, Ottawa, ON, Canada (iwatpool@toh.ca)

48 Porteous: Critical Care, Ottawa Hospital Research Institute, Ottawa, ON, Canada (rporteous@ohri.ca)

49 Chassé: Department of Medicine, Université de Montréal, and Centre de Recherche du Centre  
50 Hospitalier de l’Université de Montréal, Montréal, QC, Canada (michael.chasse@umontreal.ca)

51 Lebrasseur: Critical Care, Centre de Recherche du Centre Hospitalier Universitaire de Montréal,  
52 Montréal, QC, Canada (martine.lebrasseur.chum@ssss.gouv.qc.ca)

53 Lauzier: Population Health and Optimal Health Practice Research Unit, Centre de recherche du CHU  
54 de Québec-Université Laval, Québec, QC, Canada (francois.lauzier@fmed.ulaval.ca)

55 Turgeon: Population Health and Optimal Health Practice Research Unit, Centre de recherche du CHU  
56 de Québec-Université Laval, Québec, QC, Canada (alexis.turgeon@fmed.ulaval.ca)  
57  
58  
59  
60

1  
2  
3 Bellemare: Population Health and Optimal Health Practice Research Unit, Centre de recherche du  
4 CHU de Québec-Université Laval, Québec, QC, Canada (david.bellemare@crchudequebec.ulaval.ca)

5 Mehta: Interdepartmental Division of Critical Care Medicine, University of Toronto, and Department  
6 of Medicine, Sinai Health System, Toronto, ON, Canada (geeta.mehta@sinaihealth.ca)

7 Charbonney: Department of Medicine, Université de Montréal, and Centre de Recherche du Centre  
8 Hospitalier Universitaire de Montréal, Montréal, QC, Canada (emmanuel.charbonney@umontreal.ca)

9 Belley-Côté: Department of Medicine, Division of Cardiology, McMaster University, and Population  
10 Health Research Institute, Hamilton, ON, Canada (emilie.belley-cote@phri.ca)

11 Botton: no institutional affiliation, Sherbrooke, QC, Canada (edbotton@hotmail.com)

12 Cohen: no institutional affiliation, Sherbrooke, QC, Canada (hey.dian@gmail.com)

13 Lamontagne: Department of Medicine, Université de Sherbrooke, and Centre de recherche du Centre  
14 hospitalier universitaire de Sherbrooke, Sherbrooke, QC, Canada  
15 (francois.lamontagne@usherbrooke.ca)

16 Adhikari: Interdepartmental Division of Critical Care Medicine and Institute for Health Policy,  
17 Management, and Evaluation, University of Toronto, and Department of Critical Care Medicine,  
18 Sunnybrook Health Sciences Centre, Toronto, ON, Canada (neill.adhikari@utoronto.ca)

19  
20  
21 \* correspondence: neill.adhikari@utoronto.ca; francois.lamontagne@usherbrooke.ca

22 † contributed equally and co-senior authors  
23  
24  
25  
26  
27  
28  
29  
30  
31  
32  
33  
34  
35  
36  
37  
38  
39  
40  
41  
42  
43  
44  
45  
46  
47  
48  
49  
50  
51  
52  
53  
54  
55  
56  
57  
58  
59  
60

**Abstract**

**Introduction:** Vasodilatory hypotension is common among intensive care unit (ICU) patients; vasopressors are considered standard of care. However, optimal mean arterial pressure [MAP] targets for vasopressor titration are unknown. The objective of OVATION-65 (Optimal VAsopressor TitraTION-65) is to ascertain the effect of permissive hypotension (vasopressor titration to achieve MAP 60-65 mmHg) vs. usual care on biomarkers of organ injury in hypotensive patients  $\geq 65$  years old.

**Methods and analysis:** OVATION-65 is an allocation-concealed randomized trial in 7 Canadian hospitals. Eligible patients are  $\geq 65$  years old, in an ICU with vasodilatory hypotension, receiving vasopressors for  $\leq 12$  hours to maintain MAP  $\geq 65$  mmHg during or after adequate fluid resuscitation, and expected to receive vasopressors for  $\geq 6$  additional hours. Patients are excluded for any of the following: active treatment for spinal cord or acute brain injury; vasopressors given solely for bleeding, ventricular failure or post-cardiopulmonary bypass vasoplegia; withdrawal of life-sustaining treatments expected within 48 hours; death perceived as imminent; previous enrolment in OVATION-65; organ transplant within the last year; receiving extracorporeal life support; or lack of physician equipoise. Patients are randomized to permissive hypotension vs. usual care for up to 28 days. The primary outcome is high-sensitivity troponin T, a biomarker of cardiac injury, on day 3. Secondary outcomes include biomarkers of injury to other organs (brain, liver, intestine, skeletal muscle); lactate (a biomarker of global tissue dysoxia); resource utilization; adverse events; mortality (90 days and 6 months); and cognitive function (6 months). Assessors of biomarkers, mortality, and cognitive function are blinded to allocation.

**Ethics and dissemination:** This protocol has been approved at all sites. Consent is obtained from the eligible patient, the substitute decision-maker if the patient is incapable, or in a

1  
2  
3 deferred fashion where permitted. End-of-grant dissemination plans include presentations,  
4  
5 publications, and social media platforms and discussion forums.  
6

7 **Trial registration:** [clinicaltrials.gov](http://clinicaltrials.gov), NCT03431181  
8  
9

10  
11  
12 **Keywords**  
13

14 vasopressors; shock; critical care; biomarkers; randomized controlled trial  
15  
16  
17  
18  
19  
20  
21  
22  
23  
24  
25  
26  
27  
28  
29  
30  
31  
32  
33  
34  
35  
36  
37  
38  
39  
40  
41  
42  
43  
44  
45  
46  
47  
48  
49  
50  
51  
52  
53  
54  
55  
56  
57  
58  
59  
60

## Article summary

### Strengths and limitations of this study

- OVATION-65 is an allocation-concealed randomized clinical trial of permissive hypotension vs. usual care in patients 65 years and older with hypotension from a vasodilatory cause, a population that may be more vulnerable to adverse effects of vasopressors
- Vasopressor titration is understudied in critically ill patients, compared to other interventions such as mechanical ventilation
- The primary and many secondary outcomes, selected with input from a patient representative, focus on biomarkers of organ injury; although these are not patient-centred outcomes, results will complement clinical outcome data from larger trials
- Because of the nature of the intervention, clinician blinding is not feasible; however, outcome assessors are blinded
- The modest sample size implies that the trial is underpowered for clinical outcomes

## Introduction

Shock, a clinical syndrome of which hypotension is a cardinal feature, is common and associated with high mortality. Vasopressors are used to treat hypotension that is potentially life-threatening because they raise blood pressure by inducing vasoconstriction.<sup>1</sup> However, these medications are associated with adverse effects,<sup>2-4</sup> some of which are direct consequences of vasoconstriction-induced reduction in blood flow to vital organs. Therefore, titrating vasopressors implies balancing the risks of end-organ failure caused by hypotension and potential vasopressor-induced harm, including myocardial injury and arrhythmia, excessive vasoconstriction, hyperglycemia, and immunosuppression.<sup>2-5</sup> Permissive hypotension is a strategy of targeting a lower blood pressure when prescribing vasopressors, compared to usual care. Benefits have been associated with other 'permissive' therapies in critically ill patients, including hypoxia,<sup>6</sup> underfeeding,<sup>7</sup> hypercapnia,<sup>8</sup> red blood cell transfusion,<sup>9</sup> and hypotension in thoracic penetrating trauma.<sup>10</sup>

Clinicians in the intensive care unit (ICU) use mean arterial pressure (MAP) targets to determine the intensity of vasopressor therapy. Current international practice guidelines recommend titrating vasopressors to a MAP of 65 mmHg,<sup>11</sup> but because the target lacks an upper boundary, clinicians commonly put more emphasis on preventing hypotension than on minimizing vasopressor exposure. This under-appreciation of the risks associated with vasopressor overuse was apparent in a multicentre observational study<sup>12</sup> that reported an average MAP of 75 (standard deviation [SD] 6) mmHg in patients receiving vasopressors, approximately 10 mmHg above the recommended MAP and self-reported practice.<sup>13</sup> Given the relative lack of studies about vasopressor dosing, in contrast to other common ICU treatments such as mechanical ventilation, editorialists have advocated for better characterization of the lowest acceptable blood pressure target to avoid vasopressor-induced harm.<sup>3</sup>

### *Existing evidence*

Observational studies have described independent associations between dose and duration of vasopressor therapy and poor outcomes, such as adverse cardiac events and increased mortality.<sup>14 15</sup> However, these studies are limited by indication bias, as patients who are sicker have a greater risk of unfavourable outcomes and are therefore more likely to be exposed to higher doses of vasopressor therapy.

Two randomized clinical trials (RCTs; combined n=894) published prior to the initiation of this study compared blood pressure targets in patients receiving vasopressors.<sup>16 17</sup> The SEPSISPAM trial compared a MAP target of 65-70 mmHg vs. 80-85 mmHg for 5 days in 776 patients with septic shock from 29 French ICUs. This study reported no difference in 28-day mortality (lower MAP 34.0% vs. higher MAP 36.6%, p=0.57), but a greater risk of atrial fibrillation in the higher MAP arm (6.7% versus 2.8%, p=0.02).<sup>16</sup> However, actual MAP values were 74-76 mmHg in the lower MAP arm, precluding conclusions regarding permissive hypotension. The OVATION pilot feasibility trial randomly assigned 118 patients from 1 US and 10 Canadian ICUs to a lower (60-65 mmHg) or higher (75-80 mmHg) MAP target<sup>17</sup>. This trial was not powered to detect differences in mortality. A subsequent individual patient data meta-analysis (IPDMA)<sup>18</sup> included data from both RCTs and found that higher MAP targets (75-85 mmHg) may be associated with an increased risk of 28-day mortality in older patients (p=0.1 for interaction between age and MAP).

Based on these RCTs, guidelines state that no evidence supports the use of vasopressors to achieve MAP values >65 mmHg for patients receiving vasopressors.<sup>19</sup> Subsequently, the 65 trial randomized 2600 patients ≥65 years old in the United Kingdom to permissive hypotension vs. usual care using a similar protocol as OVATION-65.<sup>20 21</sup> Patients in the permissive hypotension arm had a lower exposure to vasopressors and a lower 90-day

1  
2  
3 mortality (41.0% vs. 43.8%,  $p=0.15$ ), but the difference was not statistically significant.

4  
5 However, an analysis adjusting for baseline covariates found lower mortality with permissive  
6 hypotension (OR 0.82, 95%CI 0.68-0.98).<sup>22</sup> The 65 trial collected no biological samples,  
7 precluding exploration of mechanisms underlying the effect of vasopressor dosing in that  
8 trial.  
9  
10  
11  
12  
13

### 14 15 16 17 *Objective and Specific Aims*

18  
19 The main objective of OVATION-65 is to determine whether permissive hypotension  
20 (MAP 60-65 mmHg) in patients  $\geq 65$  years old with a vasodilatory cause of hypotension and  
21 receiving vasopressors, compared to usual MAP targets, reduces organ injury as measured by  
22 biomarkers. Specific aims are to ascertain the effect of permissive hypotension vs. usual care  
23 on: 1) biomarkers of organ injury (heart [primary outcome], brain, liver, intestine, skeletal  
24 muscle); 2) biomarker of global tissue dysoxia (lactate); 3) organ function (assessed by  
25 Sequential Organ Failure Assessment [SOFA] score<sup>23</sup>); 4) resource utilization, 5) prespecified  
26 adverse events, 6) mortality at 90 days and 6 months; 7) cognitive impairment in survivors at  
27 6 months (Table 1).  
28  
29  
30  
31  
32  
33  
34  
35  
36  
37  
38  
39

40 The primary outcome and several secondary outcomes are focused on biomarkers  
41 because of well-documented limitations of mortality in critical care trials<sup>24</sup> and the challenges  
42 of developing valid surrogate endpoints.<sup>25</sup> OVATION-65 was designed to be complementary  
43 to the 65 trial.<sup>22</sup> A larger version of OVATION-65 ( $n=800$ ) was abandoned in 2018 after  
44 funding applications to the Canadian Institutes for Health Research and the Canadian Frailty  
45 Network were rejected. As discussed in the *Statistical Analysis* section, the Data and Safety  
46 Monitoring Committee (DSMC) recommended termination of enrollment in the current  
47 smaller version of OVATION-65 on 21 February 2020; patient follow-up is ongoing.  
48  
49  
50  
51  
52  
53  
54  
55  
56  
57  
58  
59  
60



## Methods and analysis

OVATION-65 is a multicentre, parallel-group, allocation-concealed, superiority RCT. We developed OVATION-65 on behalf of the Canadian Critical Care Trials Group (CCCTG), a 350-member organization of clinicians and researchers, incorporating feedback received since January 2012 at each of its thrice yearly scientific meetings. Table 2 shows a timeline of trial activities. The SPIRIT checklist is available in online supplementary file S1.

### *Study setting and management*

OVATION-65 is conducted in adult ICUs in 7 sites in Canada. OVATION-65 team members, including research personnel at clinical sites active at the time of submission of this manuscript, are listed in online supplementary file S2. The procedures in place for OVATION-65 were piloted during the OVATION pilot RCT.<sup>17</sup> The Unité de Recherche Clinique et Épidémiologique (URCE) is coordinating this trial and is responsible for construction and maintenance of the randomization system and the REDCap<sup>26,27</sup> electronic data capture (EDC) system. The URCE also oversees the activities of the OVATION-65 core laboratory (i.e. storage and analysis of blood and urine samples).

### *Inclusion criteria*

Patients are included if they meet all the following criteria: 1) age  $\geq 65$  years; 2) diagnosis of vasodilatory hypotension as assessed by the treating team; 3) vasopressors started  $\leq 12$  hours ago (after or during adequate fluid resuscitation, as assessed by treating physician); and 4) vasopressors expected for  $\geq 6$  additional hours, as assessed by the treating team. Aligned with the 65 trial,<sup>22</sup> we do not specify a minimum volume of fluid or specific

1  
2  
3 examinations for volume status prior to the clinical (pre-randomization) decision to  
4  
5 commence a vasopressor.  
6  
7  
8  
9

### 10 *Exclusion criteria*

11  
12 Patients are excluded if they meet any of the following criteria: 1) actively treated for  
13  
14 spinal cord injury or acute brain injury; 2) vasopressors given solely for bleeding, acute  
15  
16 ventricular failure or post-cardiopulmonary bypass vasoplegia; 3) lacking commitment to life-  
17  
18 sustaining therapies (expected withdrawal of life-sustaining treatments within the next 48  
19  
20 hours); 4) death perceived as imminent; 5) previously enrolled in OVATION-65; 6) organ  
21  
22 transplant within the last year; 7) receiving extracorporeal life support at baseline; and 8) lack  
23  
24 of treating physician equipoise regarding the overall effects of permissive hypotension vs.  
25  
26 usual care on patient important outcomes.  
27  
28  
29  
30  
31  
32

### 33 *Rationale for eligibility criteria*

34  
35 The inclusion criteria strive to identify patients most likely to benefit from permissive  
36  
37 hypotension, namely elderly patients not already exposed to a prolonged duration of higher  
38  
39 MAP but expected to require an additional period of vasopressor therapy. The exclusion  
40  
41 criteria are designed to exclude patients for whom clinicians commonly apply different MAP  
42  
43 targets (criterion 1) or whose prognosis may be dominated by factors other than the MAP  
44  
45 target (criteria 2, 3, 4, 6, 7).  
46  
47  
48  
49  
50

### 51 *Study intervention*

#### 52 Treatment allocation

53  
54  
55 Using a web randomization service available 24 hours/7 days per week, patients are  
56  
57 randomized immediately after confirming eligibility following a 1:1 sequence to permissive  
58  
59  
60

1  
2  
3 hypotension or usual care. We use permuted blocks of variable and undisclosed size (4, 6 and  
4  
5 8) and stratify randomization by site. Stratifying by site ensures equal distribution of patients  
6  
7 between arms at each site and decreases the probability that site-specific practices confound  
8  
9 treatment effects.  
10  
11  
12  
13

#### 14 Permissive hypotension arm

15  
16  
17 The intervention minimizes dose and duration of vasopressors. Treating teams adjust  
18  
19 vasopressors to a target MAP range of 60 to 65 mmHg. A MAP of 60 mmHg was selected as  
20  
21 lowest tolerable limit because it corresponds to the threshold at which Canadian intensivists  
22  
23 usually initiate vasopressors.<sup>13</sup> Accordingly, it is not uncommon for patients to have MAP as  
24  
25 low as 60 mmHg before vasopressors are instituted under usual care. The same MAP range  
26  
27 was used in the OVATION pilot RCT.<sup>17</sup>  
28  
29

30  
31 The duration of the trial intervention is determined, as it was in the pilot RCT, by the  
32  
33 duration of the hypotensive episode, up to a maximum of 28 days. For trial purposes, the  
34  
35 episode of hypotension ends when vasopressors are discontinued for 24 consecutive hours. As  
36  
37 soon as patients are able to maintain the target MAP without vasopressors, the infusions are  
38  
39 stopped. If MAP drops below 60 mmHg after this 24-hour period, and if the treating team  
40  
41 determines that vasopressors should be reinstated, they are titrated to the allocated target of  
42  
43 60 to 65 mmHg. If patients are discharged and then readmitted to the ICU, vasopressor  
44  
45 therapy is left at the discretion of the treating team. We do not mandate resumption of the  
46  
47 permissive hypotension strategy to enhance trial feasibility, and we anticipate relatively few  
48  
49 readmissions overall and rare readmissions before ascertainment of our primary outcome on  
50  
51 day 3.  
52  
53  
54  
55  
56  
57

#### 58 Usual care arm

1  
2  
3 Patients in the control arm receive usual care, as per local practice. This constitutes an  
4 improvement to the protocol of the OVATION pilot trial, which imposed a higher target MAP  
5 range of 75 to 80 mmHg. Given preliminary evidence suggesting that this higher MAP target  
6 may increase risk of death in older patients, we believe that mandating a higher MAP would  
7 be ethically questionable. By comparing permissive hypotension to usual care, we improve  
8 acceptance from clinicians and reduce the risk that the control group will diverge widely from  
9 usual care.<sup>28</sup> Risks of contamination are negligible given observational data showing that  
10 MAP values of patients treated with vasopressors are much higher than the currently  
11 recommended target of 65 mmHg. Moreover, changing the behaviour of physicians and  
12 nurses is challenging even when there is consensus on the benefit of a new intervention,<sup>29</sup> and  
13 such a consensus does not exist for permissive hypotension.<sup>30</sup> To further decrease the risk of  
14 contamination (i.e. lack of separation of MAP between arms), we monitor separation of actual  
15 MAP between study arms and communicate regularly with sites.  
16  
17  
18  
19  
20  
21  
22  
23  
24  
25  
26  
27  
28  
29  
30  
31  
32  
33  
34

### 35 Selection of vasopressors

36  
37 We do not mandate the use of any specific vasopressor or combination of vasopressors.  
38 In OVATION-65, the term 'vasopressor' refers to the following medications given by  
39 infusion: norepinephrine, epinephrine, dopamine, phenylephrine, and vasopressin. In patients  
40 receiving multiple vasopressors, we calculate the total vasopressor dose as norepinephrine  
41 equivalent as previously reported.<sup>31</sup> In addition, we collect information on orally  
42 administered catecholaminergic medications (i.e., midodrine and ephedrine).  
43  
44  
45  
46  
47  
48  
49  
50  
51  
52  
53

### 54 Other interventions

55  
56 As per usual care of patients receiving vasopressors, we expect central venous  
57 catheters (to avoid extravasation) and arterial catheters (for close MAP monitoring) to be in  
58  
59  
60

1  
2  
3 place for most patients. MAP is measured by an arterial line if present or by a non-invasive  
4  
5 blood pressure cuff otherwise; values are taken from the nursing vital signs flowsheet.

6  
7  
8 Peripheral venous lines to deliver vasopressors or non-invasive blood pressure measurements  
9  
10 do not constitute protocol deviations, consistent with a pragmatic study design. Use of pure  
11  
12 inotropes, intravenous fluids, and corticosteroids are recorded but left to the discretion of the  
13  
14 treating team.

### 15 16 17 18 19 *Outcomes*

#### 20 21 Primary outcome

22  
23 The primary outcome of OVATION-65 is high-sensitivity cardiac troponin T (hsTnT)  
24  
25 at day 3, or before anticipated death or withdrawal of life-sustaining therapies, whichever  
26  
27 comes first. A baseline sample (day 1) is collected before assignment to the intervention but  
28  
29 after vasopressors have started. Cardiac troponins are consistently associated with worse  
30  
31 outcomes in critical illness<sup>32-36</sup>, and cardiac biomarkers may be modifiable by administration  
32  
33 of albumin<sup>33</sup> and medications.<sup>34</sup> Given that coronary blood flow is maintained over a broad  
34  
35 range of coronary perfusion pressures under most circumstances,<sup>37</sup> we hypothesize that  
36  
37 increasing vasopressors to achieve a higher MAP will have little effect on coronary perfusion  
38  
39 but may increase the severity of demand-related myocardial ischemia via increased heart rate  
40  
41 (i.e. reduced coronary perfusion time) and transmural pressure (i.e. afterload). If OVATION-  
42  
43 65 shows that permissive hypotension prevents or limits hsTnT elevation, then patients at  
44  
45 increased risk of secondary myocardial ischemia, possibly identified by baseline hsTnT, may  
46  
47 benefit the most from this strategy. Similarly, this biomarker could be used to identify  
48  
49 vasopressor-induced harm earlier and modify vasopressor use accordingly.

#### 50 51 52 53 54 55 56 57 58 Secondary outcomes

1  
2  
3 Secondary outcomes include high-sensitivity cardiac troponin T (hs TnT) at day 7;  
4  
5 biomarkers associated with cardiac wall stress (plasma N-terminal pro-B-type natriuretic  
6  
7 peptide [NT-proBNP]<sup>33</sup>); tissue injury to the brain<sup>38</sup> (glial fibrillary acidic protein [GFAP]<sup>39</sup>,  
8  
9 myelin basic protein [MBP]<sup>40</sup>, neuron-specific enolase [NSE]<sup>41</sup>), liver (serum alanine  
10  
11 aminotransferase [ALT]<sup>42</sup>), intestine (plasma intestinal-type fatty acid binding protein  
12  
13 [FABP2]<sup>43</sup>), skeletal muscle (plasma creatine kinase, muscular [CKM]<sup>44</sup>); and global tissue  
14  
15 dysoxia (plasma lactate). As for hsTnT, all biomarker outcomes are measured at day 3 and 7,  
16  
17 along with a baseline sample. We selected lactate as a reasonable measure of tissue hypoxia in  
18  
19 critically ill patients but recognize that hyperlactatemia may result from other factors,  
20  
21 including aerobic glycolysis, reduced oxidative phosphorylation, and decreased clearance.<sup>45</sup>  
22  
23

24  
25 We measure secondary clinical outcomes, including organ function using SOFA score  
26  
27 (on days 1, 2, 3, 4, 7, 10, 14 and 28 while in the ICU). We describe healthcare utilization in  
28  
29 terms of duration of mechanical ventilation, renal replacement therapy, vasopressor therapy,  
30  
31 and ICU and hospital stay. We report the incidence of the pre-specified adverse events of  
32  
33 stroke, acute kidney injury (KDIGO stage 3),<sup>46</sup> clinically detected supraventricular  
34  
35 arrhythmia,<sup>5 47</sup> and limb or intestinal ischemia as defined in the OVATION pilot trial.<sup>17</sup>  
36  
37 Investigators will adjudicate these adverse events using medical records, if necessary. We  
38  
39 ascertain mortality at 90 days and 6 months. For 6-month survivors, we assess cognition using  
40  
41 the Telephone Interview for Cognitive Status (TICS), a validated questionnaire used in ICU  
42  
43 cohorts.<sup>48</sup>  
44  
45  
46  
47  
48

49 We had originally planned to measure additional secondary outcomes but lack  
50  
51 resources to do so for each participant. We have described these as planned ancillary studies  
52  
53 in online supplementary file S3.  
54  
55  
56  
57

#### 58 *Adverse events*

59  
60

1  
2  
3 OVATION-65 is testing a common intervention to treat a common problem in  
4  
5 critically ill patients. All eligible patients are at risk of adverse events due to their underlying  
6  
7 critical illness. Following Canadian guidelines for serious adverse event (SAE) reporting in  
8  
9 academic drug trials in critical care,<sup>49</sup> expected SAEs (stroke, KDIGO stage 3 acute kidney  
10  
11 injury, clinically detected supraventricular arrhythmia, limb or intestinal ischemia, death) are  
12  
13 already incorporated as trial outcomes, defined *a priori*. SAEs are limited to events not  
14  
15 already labelled as trial outcomes and that might reasonably occur as a consequence of the  
16  
17 trial interventions. SAEs must be reported in the participant's medical notes, on the  
18  
19 OVATION-65 dedicated case report form and to the coordinating centre within 24 hours of  
20  
21 observing or learning of the event. Such events are promptly discussed with the DSMC.  
22  
23  
24  
25  
26  
27

### 28 Data collection

29  
30 We collect the following data: 1) baseline data (day 1) – demographics, admitting  
31  
32 diagnosis, etiology of hypotension, severity of illness (APACHE II score<sup>50</sup>), vasopressor  
33  
34 name, dose and start time, organ dysfunction (SOFA score<sup>23</sup>), comorbidities (including  
35  
36 chronic hypertension, coronary, cerebral, or peripheral vascular disease, congestive heart  
37  
38 failure, chronic kidney disease, severe cognitive impairment, Clinical Frailty Scale,<sup>51</sup> co-  
39  
40 enrolment in other prospective observational studies or RCTs; 2) daily data – protocol  
41  
42 adherence (hourly MAP while receiving vasopressors and corresponding vasopressor names,  
43  
44 doses, and modifications) and relevant co-interventions (fluid balance, inotropes,  
45  
46 corticosteroids, life-support interventions, sedation); and 3) primary and secondary outcomes.  
47  
48  
49  
50  
51  
52

### 53 Study Samples

54  
55 To minimize the treating teams' workload, study samples (blood and urine) coincide as  
56  
57 much as possible with clinical sampling on day 1 (baseline) and on day 3 and 7 (or the day of  
58  
59  
60

1  
2  
3 ICU discharge or before anticipated death or withdrawal of life-sustaining therapies,  
4  
5 whichever comes first).

6  
7 To ensure consistent measurement of biomarkers, the study samples are processed on  
8  
9 site and shipped to URCE, where they are stored at -80°C and batched for analyses at the end  
10  
11 of the trial. Clinical teams are blinded to the results of the biomarker assays but are free to  
12  
13 measure any desired biomarker via local hospital laboratory. Participants are also approached  
14  
15 for participation in a parallel Acute Care Biobank, via a separate consent form, which allows  
16  
17 samples remaining following completion of OVATION-65 specified analyses to be stored for  
18  
19 future projects.  
20  
21  
22  
23  
24  
25

### 26 Risk of bias

27  
28 Risk of bias is reduced by concealed randomization using variable and undisclosed  
29  
30 blocks. Although clinical teams are not blinded to treatment arms, assessors of biomarkers,  
31  
32 pre-specified adverse events, mortality, and TICS are blinded to treatment allocation.  
33  
34 Specimen processing and analysis are standardized as described. Finally, we record co-  
35  
36 interventions to detect performance bias.  
37  
38  
39

40 A risk of bias related to the biomarker outcomes is that early death or live discharge  
41  
42 from the ICU, which may be related to treatment allocation, are competing risks for ongoing  
43  
44 treatment in the ICU and ascertainment of these outcomes. Our analysis plan (see *Statistical*  
45  
46 *analysis* below) accounts for this possibility.  
47  
48  
49  
50

### 51 Vasopressor management and protocol adherence

52  
53 In the permissive hypotension arm, a protocol deviation is defined as a failure to  
54  
55 reduce the dose of (or discontinue) vasopressors while the MAP is >65 mm Hg for three  
56  
57 consecutive hours. Sites report protocol deviations on study forms and are asked to specify a  
58  
59  
60



1  
2  
3 reason for the deviation, which may include a physician's decision to target a higher MAP  
4 because of particular clinical circumstances. Investigators will adjudicate protocol deviations  
5 using source data.  
6  
7  
8

9  
10 For each day on protocol, we record the MAP value recorded nearest to each hour. In  
11 the permissive hypotension arm, clinical teams are reminded to consider discontinuing  
12 vasopressor therapy if the patients are able to maintain MAP values of at least 60 mmHg.  
13  
14 Every participating site receives on-site training, to which all ICU bedside staff are invited.  
15 We distribute standard operating procedures and protocol adherence reports generated from  
16 MAP and vasopressor data entered in the electronic case report form. Regular newsletters and  
17 trial website updates (<https://www.ccctg.ca/Programs/OVATION65.aspx>) keep participating  
18 sites informed of study progress, overall adherence, and answers to frequently asked  
19 questions. Research staff are available 24/7.  
20  
21  
22  
23  
24  
25  
26  
27  
28  
29

30 We will report vasopressor management in each arm in terms of duration and total  
31 dose of vasopressor therapy received, hourly MAP values and corresponding vasopressor  
32 infusion rates, and the number of episodes of vasopressor therapy. In the permissive  
33 hypotension arm, we will report the number and proportion of patients with any protocol  
34 deviation. As in the 65 trial,<sup>22</sup> patient-level adherence will be defined as not having  
35 experienced a protocol deviation. We will also report total time on vasopressors with recorded  
36 MAP within target range; total time on vasopressors with recorded MAP above target range;  
37 total time on vasopressors with recorded MAP >5 mmHg above upper limit of target; and  
38 total time on vasopressors with recorded MAP below target range. These measures will be  
39 summarized with descriptive statistics.  
40  
41  
42  
43  
44  
45  
46  
47  
48  
49  
50  
51  
52  
53  
54  
55

#### 56 Follow-up

57  
58  
59  
60

1  
2  
3 Participants are followed to hospital discharge by local research teams. Either the  
4 coordinating centre or the enrolling site ascertains 90-day and 6-month mortality and 6-month  
5 cognitive status in survivors by telephone. Prior verification of known vital status with local  
6 research teams and calibrated telephone scripts mitigate the risk of emotional distress in the  
7 event that a patient has died since hospital discharge. We selected TICS to measure cognitive  
8 function in survivors because telephone administration reduces risk of bias, improves  
9 measurement consistency, reduces patient burden, and enhances feasibility.  
10  
11  
12  
13  
14  
15  
16  
17  
18  
19  
20

### 21 Patient and public involvement

22  
23 The protocol was developed with input from 2 ICU survivors (EB and DC), who  
24 participated in protocol development meetings, contributed to the selection of 6-month  
25 cognitive function as a secondary outcome, and are co-authors of this manuscript.  
26  
27  
28  
29  
30  
31  
32

### 33 *Statistical analysis*

#### 34 Sample size

35  
36 OVATION-65 is supported by several modest operating grants, each of which required a  
37 distinct objective, sample size calculation and analysis plan. By combining funds from  
38 multiple sources, we had planned to enrol 200 participants, which provides 80% power to  
39 detect an effect size of 0.4 in the difference between day 3 hsTnT in the permissive  
40 hypotension group compared to usual care, where 0.5 is considered to be medium.<sup>52</sup>  
41  
42  
43  
44  
45  
46  
47  
48

49 After the 65 trial<sup>22</sup> was published, the OVATION-65 Executive Committee forwarded the  
50 publication to the DSMC, which requested a meeting to discuss the results. The DSMC  
51 subsequently issued a letter on 21 February 2020 recommending termination of enrolment in  
52 OVATION-65. The DSMC “reasoned that in light of the accumulated evidence, mostly from  
53 the 65 trial<sup>22</sup> but also with some consideration of SEPSISPAM,<sup>16</sup> the posterior probability of  
54  
55  
56  
57  
58  
59  
60

1  
2  
3 lower MAP targets now being better was sufficiently high that there is no longer equipoise  
4  
5 between the interventions being compared in OVATION-65.” As of 21 February 2020, 159  
6  
7 patients had been randomized.  
8  
9

### 10 11 12 Patient flow

13  
14 A sample CONSORT diagram is presented in Figure 1.  
15  
16

### 17 18 19 Data analysis

20  
21 Analyses will be performed after all follow-up is completed, data queries are resolved,  
22  
23 and the database is locked. We will adhere to the intention-to-treat principle, and data from  
24  
25 participants will be analyzed by allocated group, regardless of protocol adherence. All  
26  
27 participant data will be analysed unless consent to retain data is withdrawn. Statistical testing  
28  
29 will use a superiority framework, with two-sided  $p < 0.05$  interpreted as statistically  
30  
31 significant. Estimates of effect will be reported with 95% confidence intervals. No  
32  
33 adjustments for multiplicity will be made. All analyses will use SAS 9.4 (Cary, USA). Given  
34  
35 the modest sample size and focus on biomarkers of organ injury, no interim analysis was  
36  
37 planned. Continuous data will be summarised as means (SD) if normally distributed and as  
38  
39 medians (Q1, Q3) otherwise. Categorical data will be summarised as frequencies and  
40  
41 proportions. Baseline data will be summarised as shown in Table 3.  
42  
43  
44  
45

46  
47 The primary outcome of day 3 hsTnT will be analysed adjusting for the day 1 value. We  
48  
49 will use the original scale and analysis of covariance if the data are not skewed; if skewed we  
50  
51 will log-transform and use robust regression to obtain more interpretable estimates. We will  
52  
53 use pooled logistic regression to estimate the probabilities of missing values due to either  
54  
55 death or live discharge from the ICU. Based on these models, we will compute the inverse-  
56  
57 probability of attrition weights for each observation and use generalized estimating equation  
58  
59  
60

1  
2  
3 models to test the differences in hs TnT between the permissive hypotension and usual care  
4  
5 arm,<sup>53</sup> adjusting for centre using fixed effects. As a sensitivity analysis, for patients that die  
6  
7 before day 3, we will impute the worst (highest) value and for patients discharged alive before  
8  
9 day 3, we will impute the best (lowest) value.  
10  
11

12 For the secondary outcome of day 7 hsTnT, we will use the same approach. For patients  
13  
14 who die before day 7, we will impute the worst (highest) value. For patients discharged alive  
15  
16 before day 7, we will impute based on data available for other patients alive at day 7. The  
17  
18 approach for all other biomarkers will be the same as for hsTnT.  
19  
20

21 For SOFA over the first 7 days, we will use a linear mixed effects model to account for  
22  
23 repeated measures within patients as well as the centre effect. For patients who die before day  
24  
25 7, we will impute the worst (highest) value. For patients discharged alive before day 7, we  
26  
27 will impute based on data available for patients in the same group alive at day 7. We will look  
28  
29 for interaction between time and group as well as time trends. For TICS, we will use ordinal  
30  
31 logistic regression with fixed effect for centre to compare the distribution of patients at 6  
32  
33 months in 4 categories (death and 3 cognitive status categories [non-impaired, mild  
34  
35 impairment, and moderate-severe impairment]). If proportional odds assumption does not  
36  
37 hold, we will use multinomial regression to compare the two groups. If there is >5% loss to  
38  
39 follow-up for TICS, we will conduct sensitivity analyses using multiple imputation  
40  
41 techniques for the missing values. We will also report the proportion of patients in each  
42  
43 category by arm and test for differences in separate categories of mortality and cognitive  
44  
45 impairment. For mortality, we will use a generalized linear mixed effect model with logit link  
46  
47 for 90 and 365 days separately. For pre-specified adverse events, we will report the proportion  
48  
49 of patients in each arm with the outcome and test for differences using chi-square test or  
50  
51 Fisher's exact test, as appropriate.  
52  
53  
54  
55  
56  
57  
58  
59  
60

1  
2  
3 In sensitivity analyses, we will also adjust for pre-specified baseline covariates:  
4  
5 APACHE II, total dose of vasopressor administration before randomization (in  
6  
7 norepinephrine equivalents),<sup>54</sup> and history of hypertension, or coronary artery disease (angina,  
8  
9 myocardial infarction [MI], or coronary revascularisation).  
10  
11

12 No subgroup analyses are prespecified due to the small sample size. An updated  
13  
14 IPDMA<sup>18</sup> including data from existing trials,<sup>16 17</sup> the 65 trial,<sup>22</sup> and the current trial is under  
15  
16 consideration.  
17  
18

### 19 20 21 *Registration*

22  
23 The trial was registered on [www.clinicaltrials.gov](http://www.clinicaltrials.gov) on 13 February 2018 before  
24  
25 enrolling the first patient in the study (NCT03431181). Initially, the primary outcome was  
26  
27 listed as hsTnT at day 7; this error was subsequently corrected on 28 May 2020. Data will not  
28  
29 be analyzed until trial follow-up is complete in August 2020.  
30  
31

### 32 33 34 35 36 *Data management*

37  
38 The paper or electronic case report forms (CRFs) are the primary data collection tool  
39  
40 for the study. All data requested on the CRF are recorded on paper CRFs or on the electronic  
41  
42 CRFs within the secure REDCap EDC system. If the data are first collected on paper CRFs,  
43  
44 site research personnel subsequently transfer all data into REDCap by direct entry.  
45  
46  
47  
48

### 49 50 51 *Monitoring*

52 Quality control measures include 1) site training of research and clinical personnel on  
53  
54 eligibility assessment, trial procedures, and data collection; 2) standard operating procedures  
55  
56 to guide processing, storage, and shipping of blood and urine samples; 3) ongoing assessment  
57  
58  
59  
60

1  
2  
3 of trial management metrics (monthly screening logs, monthly reports (site enrolment,  
4 protocol adherence in the permissive hypotension arm and regarding study samples), and  
5 periodic feedback to the clinical sites on performance (recruitment, protocol adherence), with  
6 benchmarking from other sites; 4) ongoing review of missing data and outliers; and 5) rapid  
7 dissemination of responses to frequently asked questions via our study website and monthly  
8 newsletter. For one site, we also conducted monitoring visits for 2 of the first 5 participants  
9 and 10% of the subsequent participants. Coordinating Centre staff and the Principal  
10 Investigators were available at all times to answer study-related questions.  
11  
12  
13  
14  
15  
16  
17  
18  
19  
20  
21  
22  
23  
24

### 25 *Trial oversight*

#### 26 Executive Committee

27  
28 The Executive Committee is comprised of Neill KJ Adhikari, M Elizabeth Wilcox,  
29 and François Lamontagne (co-principal investigators), Marie-Claude Battista (core  
30 laboratory), and Marie-Hélène Masse (project leader). The Executive Committee is  
31 responsible for day-to-day management.  
32  
33  
34  
35  
36  
37  
38  
39  
40

#### 41 Data Safety Monitoring Committee

42  
43 The DSMC is independent of the study investigators and responsible for safeguarding  
44 the interests of study participants, assessing the safety and efficacy of study procedures, and  
45 monitoring the overall conduct of the study. DSMC members have extensive trial experience  
46 and include a senior methodologist who has served as Chair on numerous DSMCs for  
47 international RCTs, a senior biostatistician, and a clinician scientist in intensive care (online  
48 supplementary file S1). The DSMC met on an *ad hoc* basis to review reports of unanticipated  
49 serious adverse events (SAEs) not predefined as study outcomes. In accordance with a  
50  
51  
52  
53  
54  
55  
56  
57  
58  
59  
60

1  
2  
3 prespecified DSMC Charter, the DSMC advised the Executive Committee of any concerns  
4 related to participant safety and trial conduct. After each meeting, the DSMC made a  
5 recommendation for study continuation as designed, continuation with major or minor  
6 modifications, temporary suspension of enrolment until some uncertainty is resolved, or  
7 termination. As noted above, the DSMC recommended termination of enrolment in response  
8 to data from the 65 trial.<sup>22</sup>  
9  
10  
11  
12  
13  
14  
15  
16  
17  
18

### 19 **Ethics and Dissemination**

20  
21 This protocol was approved by the Comité d'éthique de la recherche du Centre intégré  
22 universitaire de santé et de services sociaux de l'Estrie – Centre hospitalier universitaire de  
23 Sherbrooke (MP-31-2018-1789). All participating clinical sites received local research ethics  
24 board (REB) approval prior to commencing participant enrolment. Before initiating the trial,  
25 each clinical site provided the Coordinating Centre with a copy of their local REB approval  
26 letter and approved informed consent form (sample in online supplementary file S4). Protocol  
27 amendments were submitted to each REB and disseminated to all investigators.  
28  
29  
30  
31  
32  
33  
34  
35  
36

37 Informed consent was obtained by local research personnel, who approach eligible  
38 patients directly if they are able to consent. If the eligible patient was not capable, research  
39 personnel approached the substitute decision-maker (SDM) to obtain consent in person, or by  
40 telephone if the SDM is unavailable. Alternatively, the patient was randomized and consent  
41 was obtained subsequently under a deferred consent model, where permitted by the site REB.  
42 Consent was requested for future laboratory analyses that may arise from this protocol.  
43  
44  
45  
46  
47  
48  
49

50  
51 Participants may discontinue participation in the OVATION-65 trial at any time. If a  
52 participant wishes to withdraw consent, we will use the following strategies to minimize the  
53 impact on the trial, while respecting autonomy. We will seek a better understanding of the  
54 participant's wishes and offer the following alternatives to complete withdrawal, which would  
55  
56  
57  
58  
59  
60

1  
2  
3 include no further study intervention (only relevant for participants in the permissive  
4 hypotension arm), data deletion, and sample destruction: 1) Discontinue study intervention  
5 but allow data collection (clinical data, sample collection, telephone follow-up); 2)  
6 Discontinue study intervention, in-person follow-up, and sample collection but allow  
7 telephone follow-up; or 3) Discontinue study intervention, sample collection, and in-person  
8 and telephone follow-up, but allow access to medical records.  
9  
10  
11  
12  
13  
14  
15

16  
17 All personal health information collected during the study remains strictly confidential  
18 in a secure database. Participants are identified by an alphanumeric code, and the linkage  
19 from the alphanumeric code to identifying information is kept in secure storage under the  
20 supervision of the local principal investigator.  
21  
22  
23  
24  
25

26  
27 There was no compensation for harm suffered from trial participation; details on data  
28 collection for adverse events are given above. Patients enrolled in this trial were critically ill  
29 and all care was provided by intensive care clinicians. There was no provision for post-trial  
30 care other than usual clinical care for ICU patients.  
31  
32  
33  
34

35  
36 Plans for end-of-grant dissemination include presentations at international critical care  
37 conferences and journal publications. In addition, building on the experience with social  
38 media during the OVATION pilot trial, we will disseminate our results via social media  
39 platforms and discussion forums managed by partner organizations.  
40  
41  
42  
43

44  
45 Authorship of the trial manuscript will be based on leadership roles in trial  
46 management and at clinical sites, specific expertise (e.g. methodological, laboratory), and  
47 contributions as defined by International Committee of Medical Journal Editors criteria.  
48  
49  
50

## 51 **Data statement**

52  
53 The OVATION-65 protocol is freely accessible via this publication. The principal  
54 investigators, project leader, and study statisticians will have access to the full trial dataset;  
55 there are no contractual limitations to such access. Requests for access to the participant-level  
56  
57  
58  
59  
60



1  
2  
3 dataset and statistical code will be considered by the Executive Committee after publication  
4  
5 of primary results and planned secondary studies by co-investigators.  
6  
7  
8  
9

### 10 **Trial status**

11  
12 The current protocol is version 6, dated 29 November 2019. Participant recruitment  
13  
14 began on 17 February 2018 and was scheduled to continue until approximately June 2020. As  
15  
16 noted, the DSMC recommended termination of enrollment on 21 February 2020. The  
17  
18 database will be locked after the last enrolled patient completes the 6-month follow-up in  
19  
20 August 2020, and 6 additional months will be required to address remaining data queries and  
21  
22 to finalize the analyses.  
23  
24  
25

### 26 Contact information for trial sponsor

27  
28 François Lamontagne (francois.lamontagne@usherbrooke.ca)  
29  
30 Université de Sherbrooke  
31  
32 3001 12e Avenue Nord  
33  
34 Sherbrooke QC J1H 5 N4 Canada  
35  
36  
37  
38  
39  
40  
41  
42  
43  
44  
45  
46  
47  
48  
49  
50  
51  
52  
53  
54  
55  
56  
57  
58  
59  
60

### Authors' contributions

NA and FLam drafted the protocol for the OVATION-65 trial and drafted the manuscript; they contributed equally and co-senior authors. MHM, MCB, MEW, RPi, NM, FD'A, CS-A, MM, M-AL, HQM, BGB, YP, ECa, AJES, IW, RPo, MC, ML, FLau, AT, DB, SM, ECh, EB-C, EB, and DC contributed to protocol development and revised the manuscript. MHM, MCB, MEW, FLam, and NA on the Executive Committee. All authors read and approved the final manuscript.

### Competing interests

The authors declare that they have no competing interests.

### Funding statement

OVATION-65 is funded by the Lotte and John Hecht Memorial Foundation (grant no. 4410); internal grants from the Université de Sherbrooke/Merck Sharp and Dohme and the Centre de recherche du CHUS/Projet Structurant; and a research chair awarded to François Lamontagne (Chaire de recherche axée sur le patient et les soins hospitaliers aigus). The funders and institutional sponsor had no role in the design of the study, ongoing data collection, planned data analysis and interpretation, or writing of this manuscript or of the study protocol. François Lamontagne is supported by an award from the Fonds de recherche du Québec - Santé.

### Acknowledgements

We thank the Unité de Recherche Clinique et Épidémiologique of the Centre de Recherche du Centre Hospitalier Universitaire de Sherbrooke for their commitment to the coordination of the study; and Claudio Martin for a careful review of an earlier version of this manuscript, on behalf of the Canadian Critical Care Trials Group Grants and Manuscripts Committee.

**Word count** [main text] 5168

## References

1. Hollenberg SM. Vasoactive drugs in circulatory shock. *Am J Respir Crit Care Med* 2011;183(7):847-55. doi: 201006-0972CI [pii]  
10.1164/rccm.201006-0972CI [published Online First: 2010/11/26]
2. Andreis DT, Singer M. Catecholamines for inflammatory shock: a Jekyll-and-Hyde conundrum. *Intensive Care Med* 2016;42(9):1387-97. doi: 10.1007/s00134-016-4249-z
3. Singer M. Catecholamine treatment for shock--equally good or bad? *Lancet* 2007;370(9588):636-7.
4. Singer M, Glynne P. Treating critical illness: the importance of first doing no harm. *PLoS Medicine / Public Library of Science* 2005;2(6):e167.
5. Walkey AJ, Adhikari NKJ, Day AG, et al. Mediation Analysis of High Blood Pressure Targets, Arrhythmias, and Shock Mortality. *Am J Respir Crit Care Med* 2019;199(6):802-05. doi: 10.1164/rccm.201808-1435LE
6. Girardis M, Busani S, Damiani E, et al. Effect of Conservative vs Conventional Oxygen Therapy on Mortality Among Patients in an Intensive Care Unit: The Oxygen-ICU Randomized Clinical Trial. *JAMA* 2016;316(15):1583-89. doi: 10.1001/jama.2016.11993
7. Arabi YM, Aldawood AS, Al-Dorzi HM, et al. Permissive Underfeeding or Standard Enteral Feeding in High- and Low-Nutritional-Risk Critically Ill Adults. Post Hoc Analysis of the PermiT Trial. *Am J Respir Crit Care Med* 2017;195(5):652-62. doi: 10.1164/rccm.201605-1012OC [published Online First: 2016/09/03]
8. Ventilation with lower tidal volumes as compared with traditional tidal volumes for acute lung injury and the acute respiratory distress syndrome. The Acute Respiratory Distress Syndrome Network. *The New England journal of medicine* 2000;342(18):1301-8.
9. Hebert PC, Wells G, Blajchman MA, et al. A multicenter, randomized, controlled clinical trial of transfusion requirements in critical care. Transfusion Requirements in Critical Care Investigators, Canadian Critical Care Trials Group. *The New England journal of medicine* 1999;340(6):409-17.
10. Bickell WH, Wall MJ, Jr., Pepe PE, et al. Immediate versus delayed fluid resuscitation for hypotensive patients with penetrating torso injuries. *The New England journal of medicine* 1994;331(17):1105-9. doi: 10.1056/NEJM199410273311701 [published Online First: 1994/10/27]
11. Rhodes A, Evans LE, Alhazzani W, et al. Surviving Sepsis Campaign: International Guidelines for Management of Sepsis and Septic Shock: 2016. *Intensive Care Med* 2017;43(3):304-77. doi: 10.1007/s00134-017-4683-6 [published Online First: 2017/01/20]
12. Lamontagne F, Cook DJ, Meade MO, et al. Vasopressor Use for Severe Hypotension-A Multicentre Prospective Observational Study. *PLoS One* 2017;12(1):e0167840. doi: 10.1371/journal.pone.0167840
13. Lamontagne F, Cook DJ, Adhikari NKJ, et al. Vasopressor administration and sepsis: A survey of Canadian intensivists. *Journal of Critical Care* 2011;26(5) doi: 10.1016/j.jcrc.2011.01.005
14. Schmittinger CA, Torgersen C, Luckner G, et al. Adverse cardiac events during catecholamine vasopressor therapy: a prospective observational study. *Intensive Care Med* 2012;38(6):950-8. doi: 10.1007/s00134-012-2531-2 [published Online First: 2012/04/25]

15. Dunser MW, Ruokonen E, Pettila V, et al. Association of arterial blood pressure and vasopressor load with septic shock mortality: a post hoc analysis of a multicenter trial. *Crit Care* 2009;13(6):R181. doi: cc8167 [pii] 10.1186/cc8167 [published Online First: 2009/11/18]
16. Asfar P, Meziani F, Hamel JF, et al. High versus Low Blood-Pressure Target in Patients with Septic Shock. *The New England journal of medicine* 2014 doi: 10.1056/NEJMoa1312173 [published Online First: 2014/03/19]
17. Lamontagne F, Meade MO, Hebert PC, et al. Higher versus lower blood pressure targets for vasopressor therapy in shock: a multicentre pilot randomized controlled trial. *Intensive Care Med* 2016;42(4):542-50. doi: 10.1007/s00134-016-4237-3
18. Lamontagne F, Day AG, Meade MO, et al. Pooled analysis of higher versus lower blood pressure targets for vasopressor therapy septic and vasodilatory shock. *Intensive Care Med* 2018;44(1):12-21. doi: 10.1007/s00134-017-5016-5 [published Online First: 2017/12/21]
19. Rochweg B, Hylands M, Moller M, et al. CCCS-SSAI WikiRecs Clinical Practice Guideline: vasopressor blood pressure targets in critically ill adults with hypotension. *Can J Anaesth* 2017;64(7):763-65. doi: 10.1007/s12630-017-0878-0 [published Online First: 2017/05/13]
20. Richards-Belle A, Mouncey PR, Grieve RD, et al. Evaluating the clinical and cost-effectiveness of permissive hypotension in critically ill patients aged 65 years or over with vasodilatory hypotension: Protocol for the 65 randomised clinical trial. *J Intensive Care Soc* 2019:1751143719870088. doi: 10.1177/1751143719870088
21. Thomas K, Patel A, Sadique MZ, et al. Evaluating the clinical and cost-effectiveness of permissive hypotension in critically ill patients aged 65 years or over with vasodilatory hypotension: Statistical and Health Economic Analysis Plan for the 65 trial. *J Intensive Care Soc* 2019:1751143719860387. doi: 10.1177/1751143719860387
22. Lamontagne F, Richards-Belle A, Thomas K, et al. Effect of Reduced Exposure to Vasopressors on 90-Day Mortality in Older Critically Ill Patients With Vasodilatory Hypotension: A Randomized Clinical Trial. *JAMA* 2020;323(10):939-49. doi: 10.1001/jama.2020.0930 [published Online First: 2020/02/13]
23. Vincent JL, Moreno R, Takala J, et al. The SOFA (Sepsis-related Organ Failure Assessment) score to describe organ dysfunction/failure. On behalf of the Working Group on Sepsis-Related Problems of the European Society of Intensive Care Medicine. *Intensive Care Med* 1996;22(7):707-10. doi: 10.1007/bf01709751 [published Online First: 1996/07/01]
24. Petros AJ, Marshall JC, van Saene HK. Should morbidity replace mortality as an endpoint for clinical trials in intensive care? *Lancet* 1995;345(8946):369-71. doi: 10.1016/s0140-6736(95)90347-x [published Online First: 1995/02/11]
25. Svensson S, Menkes DB, Lexchin J. Surrogate outcomes in clinical trials: a cautionary tale. *JAMA Intern Med* 2013;173(8):611-2. doi: 10.1001/jamainternmed.2013.3037 [published Online First: 2013/03/27]
26. Harris PA, Taylor R, Minor BL, et al. The REDCap consortium: Building an international community of software platform partners. *J Biomed Inform* 2019;95:103208. doi: 10.1016/j.jbi.2019.103208 [published Online First: 2019/05/13]
27. Harris PA, Taylor R, Thielke R, et al. Research electronic data capture (REDCap)--a metadata-driven methodology and workflow process for providing translational research informatics support. *J Biomed Inform* 2009;42(2):377-81. doi: 10.1016/j.jbi.2008.08.010 [published Online First: 2008/10/22]

- 1
  - 2
  - 3
  - 4
  - 5
  - 6
  - 7
  - 8
  - 9
  - 10
  - 11
  - 12
  - 13
  - 14
  - 15
  - 16
  - 17
  - 18
  - 19
  - 20
  - 21
  - 22
  - 23
  - 24
  - 25
  - 26
  - 27
  - 28
  - 29
  - 30
  - 31
  - 32
  - 33
  - 34
  - 35
  - 36
  - 37
  - 38
  - 39
  - 40
  - 41
  - 42
  - 43
  - 44
  - 45
  - 46
  - 47
  - 48
  - 49
  - 50
  - 51
  - 52
  - 53
  - 54
  - 55
  - 56
  - 57
  - 58
  - 59
  - 60
28. Angriman F, Masse MH, Adhikari NKJ. Defining standard of practice: pros and cons of the usual care arm. *Curr Opin Crit Care* 2019;25(5):498-504. doi: 10.1097/MCC.0000000000000642 [published Online First: 2019/07/25]
29. Bellani G, Laffey JG, Pham T, et al. Epidemiology, Patterns of Care, and Mortality for Patients With Acute Respiratory Distress Syndrome in Intensive Care Units in 50 Countries. *JAMA* 2016;315(8):788-800. doi: 10.1001/jama.2016.0291
30. Schortgen F, Schetz M. Does this critically ill patient with oliguria need more fluids, a vasopressor, or neither? *Intensive Care Med* 2017;43(6):907-10. doi: 10.1007/s00134-017-4744-x [published Online First: 2017/03/16]
31. Brown SM, Lanspa MJ, Jones JP, et al. Survival after shock requiring high-dose vasopressor therapy. *Chest* 2013;143(3):664-71. doi: 10.1378/chest.12-1106 [published Online First: 2012/08/23]
32. Lim W, Qushmaq I, Devereaux PJ, et al. Elevated cardiac troponin measurements in critically ill patients. *Arch Intern Med* 2006;166(22):2446-54. doi: 10.1001/archinte.166.22.2446
33. Masson S, Caironi P, Fanizza C, et al. Sequential N-Terminal Pro-B-Type Natriuretic Peptide and High-Sensitivity Cardiac Troponin Measurements During Albumin Replacement in Patients With Severe Sepsis or Septic Shock. *Crit Care Med* 2016;44(4):707-16. doi: 10.1097/CCM.0000000000001473
34. Poe S, Vandivier-Pletsch RH, Clay M, et al. Cardiac Troponin Measurement in the Critically Ill: Potential for Guiding Clinical Management. *J Investig Med* 2015;63(8):905-15. doi: 10.1097/JIM.0000000000000239
35. Rosjo H, Varpula M, Hagve TA, et al. Circulating high sensitivity troponin T in severe sepsis and septic shock: distribution, associated factors, and relation to outcome. *Intensive Care Med* 2011;37(1):77-85. doi: 10.1007/s00134-010-2051-x
36. Waxman DA, Hecht S, Schappert J, et al. A model for troponin I as a quantitative predictor of in-hospital mortality. *J Am Coll Cardiol* 2006;48(9):1755-62. doi: 10.1016/j.jacc.2006.05.075
37. Goodwill AG, Dick GM, Kiel AM, et al. Regulation of Coronary Blood Flow. *Compr Physiol* 2017;7(2):321-82. doi: 10.1002/cphy.c160016 [published Online First: 2017/03/24]
38. Glushakova OY, Glushakov AV, Miller ER, et al. Biomarkers for acute diagnosis and management of stroke in neurointensive care units. *Brain Circ* 2016;2(1):28-47. doi: 10.4103/2394-8108.178546 [published Online First: 2016/01/01]
39. Shemilt M, Boutin A, Lauzier F, et al. Prognostic Value of Glial Fibrillary Acidic Protein in Patients With Moderate and Severe Traumatic Brain Injury: A Systematic Review and Meta-Analysis. *Crit Care Med* 2019;47(6):e522-e29. doi: 10.1097/CCM.0000000000003728 [published Online First: 2019/03/20]
40. Fink EL, Berger RP, Clark RS, et al. Serum biomarkers of brain injury to classify outcome after pediatric cardiac arrest\*. *Critical care medicine* 2014;42(3):664-74. doi: 10.1097/01.ccm.0000435668.53188.80 [published Online First: 2013/10/30]
41. Anderson BJ, Reilly JP, Shashaty MGS, et al. Admission plasma levels of the neuronal injury marker neuron-specific enolase are associated with mortality and delirium in sepsis. *J Crit Care* 2016;36:18-23. doi: 10.1016/j.jcrc.2016.06.012 [published Online First: 2016/11/05]
42. Thomson SJ, Cowan ML, Johnston I, et al. 'Liver function tests' on the intensive care unit: a prospective, observational study. *Intensive Care Med* 2009;35(8):1406-11. doi: 10.1007/s00134-009-1511-7 [published Online First: 2009/06/11]

- 1  
2  
3 43. Derikx JP, Schellekens DH, Acosta S. Serological markers for human intestinal ischemia:  
4 A systematic review. *Best Pract Res Clin Gastroenterol* 2017;31(1):69-74. doi:  
5 10.1016/j.bpg.2017.01.004  
6  
7 44. Shapiro ML, Baldea A, Luchette FA. Rhabdomyolysis in the intensive care unit. *J*  
8 *Intensive Care Med* 2012;27(6):335-42. doi: 10.1177/0885066611402150 [published  
9 Online First: 2011/03/26]  
10  
11 45. Kraut JA, Madias NE. Lactic acidosis. *The New England journal of medicine*  
12 2014;371(24):2309-19. doi: 10.1056/NEJMra1309483 [published Online First:  
13 2014/12/11]  
14  
15 46. Kidney Disease: Improving Global Outcomes (KDIGO) Acute Kidney Injury Work  
16 Group. KDIGO Clinical Practice Guideline for Acute Kidney Injury. *Kidney Int Suppl*  
17 (2011) 2012;2:1-138.  
18  
19 47. Walkey AJ, Wiener RS, Ghobrial JM, et al. Incident stroke and mortality associated with  
20 new-onset atrial fibrillation in patients hospitalized with severe sepsis. *JAMA*  
21 2011;306(20):2248-54. doi: 10.1001/jama.2011.1615  
22  
23 48. Knopman DS, Roberts RO, Geda YE, et al. Validation of the telephone interview for  
24 cognitive status-modified in subjects with normal cognition, mild cognitive  
25 impairment, or dementia. *Neuroepidemiology* 2010;34(1):34-42. doi:  
26 10.1159/000255464 [published Online First: 2009/11/07]  
27  
28 49. Cook D, Lauzier F, Rocha MG, et al. Serious adverse events in academic critical care  
29 research. *CMAJ : Canadian Medical Association journal = journal de l'Association*  
30 *medicale canadienne* 2008;178(9):1181-4. doi: 10.1503/cmaj.071366 [published  
31 Online First: 2008/04/23]  
32  
33 50. Knaus WA, Draper EA, Wagner DP, et al. APACHE II: a severity of disease classification  
34 system. *Crit Care Med* 1985;13(10):818-29. [published Online First: 1985/10/01]  
35  
36 51. Rockwood K, Song X, MacKnight C, et al. A global clinical measure of fitness and frailty  
37 in elderly people. *CMAJ : Canadian Medical Association journal = journal de*  
38 *l'Association medicale canadienne* 2005;173(5):489-95. doi: 10.1503/cmaj.050051  
39 [published Online First: 2005/09/01]  
40  
41 52. Cohen J. *Statistical Power Analysis for the Behavioral Sciences*, 2nd ed. New York:  
42 Lawrence Erlbaum Associates 1988.  
43  
44 53. Weuve J, Tchetgen Tchetgen EJ, Glymour MM, et al. Accounting for bias due to selective  
45 attrition: the example of smoking and cognitive decline. *Epidemiology*  
46 2012;23(1):119-28. doi: 10.1097/EDE.0b013e318230e861 [published Online First:  
47 2011/10/13]  
48  
49 54. Russell JA, Walley KR, Singer J, et al. Vasopressin versus norepinephrine infusion in  
50 patients with septic shock. *The New England journal of medicine* 2008;358(9):877-87.  
51 doi: 10.1056/NEJMoa067373 [published Online First: 2008/02/29]  
52  
53  
54  
55  
56  
57  
58  
59  
60

**Online supplementary files**

S1 (.pdf format)

SPIRIT checklist.

S2 (.pdf format)

OVATION-65 contributors.

S3 (.pdf format)

Ancillary studies.

S4 (.pdf format)

Model informed consent form.

**Figure legend**

Figure 1. Progress of patients through the trial. ‘Co-enrolled in another study’ refers to a study for which the principal investigators of OVATION-65 or the other study had prespecified that co-enrolment would not be allowed.

Table 1 Summary of objectives and outcomes

| Objectives                        | Outcomes                                                                                                                                                                                        |
|-----------------------------------|-------------------------------------------------------------------------------------------------------------------------------------------------------------------------------------------------|
| <b>Biomarkers of organ injury</b> |                                                                                                                                                                                                 |
| Heart                             | High-sensitivity cardiac troponin T (hsTnT)<br>N-terminal pro-B-type natriuretic peptide (NT-proBNP)                                                                                            |
| Brain                             | Glial fibrillary acidic protein (GFAP)<br>Ubiquitin C-terminal hydrolase L1 (UCHL1)<br>Myelin Basic Protein (MBP)<br>Neuron-specific enolase (NSE)                                              |
| Liver                             | Alanine aminotransferase (ALT)                                                                                                                                                                  |
| Intestine                         | Intestinal-type fatty acid binding protein (FABP2)                                                                                                                                              |
| Skeletal muscle                   | Creatinine kinase, muscular (CKM)                                                                                                                                                               |
| <b>Global tissue dysoxia</b>      | Lactate                                                                                                                                                                                         |
| <b>Organ function</b>             | Sequential Organ Failure Assessment (SOFA) score on days 1, 2, 3, 4, 7, 10, 14, and 28 while in the ICU                                                                                         |
| <b>Resource utilization</b>       | Incidence and duration of mechanical ventilation<br>Incidence and duration of renal replacement therapy<br>Duration of vasopressor therapy<br>Duration of ICU stay<br>Duration of hospital stay |
| <b>Adverse events</b>             | Supraventricular arrhythmia<br>Stroke<br>Acute kidney injury (KDIGO stage 3)<br>Limb ischemia<br>Intestinal ischemia                                                                            |
| <b>Mortality</b>                  | 90 days<br>6 months                                                                                                                                                                             |
| <b>Cognitive impairment</b>       | Telephone Interview for Cognitive Status (TICS) at 6 months                                                                                                                                     |

KDIGO, Kidney Disease: Improving Global Outcomes.

All biomarkers are measured in plasma.



Table 2 OVATION-65 Trial Timeline

|                                                                           | Study Period             |                 |   |   |         |   |         |    |           |    |           |    |             | Months |
|---------------------------------------------------------------------------|--------------------------|-----------------|---|---|---------|---|---------|----|-----------|----|-----------|----|-------------|--------|
|                                                                           | Days                     | Days            |   |   |         |   |         |    |           |    |           |    | Months      |        |
|                                                                           | Enrolment/<br>Allocation | Post-Allocation |   |   |         |   |         |    |           |    |           |    |             |        |
| TIME POINTS                                                               | 1                        | 2               | 3 | 4 | 5-<br>6 | 7 | 8-<br>9 | 10 | 11-<br>13 | 14 | 15-<br>27 | 28 | 6<br>months |        |
| <b>ENROLMENT:</b>                                                         |                          |                 |   |   |         |   |         |    |           |    |           |    |             |        |
| Eligibility screen                                                        | x                        |                 |   |   |         |   |         |    |           |    |           |    |             |        |
| Informed consent                                                          | x                        |                 |   |   |         |   |         |    |           |    |           |    |             |        |
| Allocation                                                                | x                        |                 |   |   |         |   |         |    |           |    |           |    |             |        |
| <b>INTERVENTION:</b>                                                      |                          |                 |   |   |         |   |         |    |           |    |           |    |             |        |
| Permissive hypotension<br>(MAP 60-65 mmHg)<br>vs. usual care <sup>a</sup> |                          |                 |   |   |         |   |         |    |           |    |           |    | →           |        |
| <b>ASSESSMENTS:</b>                                                       |                          |                 |   |   |         |   |         |    |           |    |           |    |             |        |
| <b>Baseline variables</b>                                                 |                          |                 |   |   |         |   |         |    |           |    |           |    |             |        |
| Diagnosis of admission                                                    | x                        |                 |   |   |         |   |         |    |           |    |           |    |             |        |
| Severity of illness<br>(APACHE II score)                                  | x                        |                 |   |   |         |   |         |    |           |    |           |    |             |        |
| Pre-existing<br>comorbidities<br>(Clinical Frailty Score)                 | x                        |                 |   |   |         |   |         |    |           |    |           |    |             |        |
| <b>Outcomes</b>                                                           |                          |                 |   |   |         |   |         |    |           |    |           |    |             |        |
| Troponin hs TnT <sup>b</sup>                                              | x                        |                 | x |   |         | x |         |    |           |    |           |    |             |        |
| Biomarkers of organ<br>injury <sup>c</sup>                                | x                        |                 | x |   |         | x |         |    |           |    |           |    |             |        |
| Global tissue dysoxia<br>(lactate)                                        | x                        |                 | x |   |         | x |         |    |           |    |           |    |             |        |
| Organ function<br>including renal<br>function (SOFA score)                | x                        | x               | x | x |         | x |         | x  |           | x  |           | x  |             |        |
| Resource utilization <sup>d</sup>                                         |                          |                 |   |   |         |   |         |    |           | x  |           |    |             |        |
| Mortality at 90 days<br>and 6 months                                      |                          |                 |   |   |         |   |         |    |           |    |           |    | →           | x      |
| Cognitive impairment<br>(TICS) at 6 months                                |                          |                 |   |   |         |   |         |    |           |    |           |    |             | x      |
| Stroke                                                                    |                          |                 |   |   |         |   |         |    |           |    |           |    | →           |        |
| Supraventricular<br>arrhythmia                                            |                          |                 |   |   |         |   |         |    |           |    |           |    | →           |        |
| Limb or intestinal<br>ischemia                                            |                          |                 |   |   |         |   |         |    |           |    |           |    | →           |        |
| Occurrence of stage 3<br>acute kidney injury <sup>e</sup>                 |                          |                 |   |   |         |   |         |    |           |    |           |    | →           |        |
| <b>Other variables</b>                                                    |                          |                 |   |   |         |   |         |    |           |    |           |    |             |        |
| Protocol adherence <sup>f</sup>                                           |                          |                 |   |   |         |   |         |    |           |    |           |    | →           |        |
| Co-interventions <sup>g</sup>                                             |                          |                 |   |   |         |   |         |    |           |    |           |    | →           |        |

<sup>a</sup> Mean arterial pressure target while receiving vasopressor therapy up to day 28, or discontinuation for more than 24 hours.

<sup>b</sup> hs TnT at day 3 is the primary outcome and at day 7 is a secondary outcome

1  
2  
3 <sup>c</sup> NT-proBNP, GFAP, UCHL1, Myelin Basic Protein, NSE, ALT, intestinal-fatty acid binding protein, CK

4 <sup>d</sup> Mechanical ventilation, renal replacement therapy, vasopressor therapy, ICU and hospital stay

5 <sup>e</sup> As defined by KDIGO (Kidney Disease: Improving Global Outcomes) criteria

6 <sup>f</sup> Mean arterial pressure reached while on vasopressor therapy and samples collected per protocol instructions

7 <sup>g</sup> Inotropes, corticosteroids, benzodiazepines, opioids, propofol, epidural anesthesia

8  
9  
10  
11  
12  
13  
14  
15  
16  
17  
18  
19  
20  
21  
22  
23  
24  
25  
26  
27  
28  
29  
30  
31  
32  
33  
34  
35  
36  
37  
38  
39  
40  
41  
42  
43  
44  
45  
46  
47  
48  
49  
50  
51  
52  
53  
54  
55  
56  
57  
58  
59  
60

For peer review only

Table 3 Baseline characteristics

| Characteristic                                                           | Permissive hypotension (n= ) | Usual care (n= ) |
|--------------------------------------------------------------------------|------------------------------|------------------|
| <i>Demographics</i>                                                      |                              |                  |
| Age, years, mean (SD)                                                    |                              |                  |
| Female sex, n (%)                                                        |                              |                  |
| Weight, kg; mean (SD)                                                    |                              |                  |
| Clinical Frailty Scale <sup>a</sup> >4, n (%)                            |                              |                  |
| APACHE II <sup>b</sup> , mean (SD)                                       |                              |                  |
| <i>Comorbidities</i>                                                     |                              |                  |
| Cardiac, n (%)                                                           |                              |                  |
| Supraventricular arrhythmia                                              |                              |                  |
| Ventricular arrhythmia                                                   |                              |                  |
| Coronary artery disease <sup>c</sup>                                     |                              |                  |
| CHF class 1-3                                                            |                              |                  |
| CHF class 4                                                              |                              |                  |
| LVEF, % (mean, SD)                                                       |                              |                  |
| Vascular, n (%)                                                          |                              |                  |
| Known hypertension                                                       |                              |                  |
| Peripheral vascular disease or claudication                              |                              |                  |
| Cerebrovascular disease                                                  |                              |                  |
| Diabetes (type 1 or 2), n (%)                                            |                              |                  |
| Renal, n (%)                                                             |                              |                  |
| Receiving chronic dialysis                                               |                              |                  |
| Baseline creatinine <sup>d</sup> ; mean (SD)                             |                              |                  |
| Child's B or C cirrhosis, n (%)                                          |                              |                  |
| Chronic lung disease, n (%)                                              |                              |                  |
| Immunosuppression, n (%)                                                 |                              |                  |
| Cognitive impairment or dementia, n (%)                                  |                              |                  |
| <i>ICU admission data</i>                                                |                              |                  |
| Primary ICU diagnosis, n (%)                                             |                              |                  |
| Medical                                                                  |                              |                  |
| Surgical                                                                 |                              |                  |
| Transfer from another hospital, n (%)                                    |                              |                  |
| Time from ICU admission to randomization, hours; mean (SD)               |                              |                  |
| Vasopressor dose, mean norepinephrine equivalents (mean µg/kg/min, [SD]) |                              |                  |
| Vasopressors, n (%)                                                      |                              |                  |
| Norepinephrine                                                           |                              |                  |
| Epinephrine                                                              |                              |                  |
| Dopamine                                                                 |                              |                  |
| Phenylephrine                                                            |                              |                  |
| Vasopressin                                                              |                              |                  |
| Inotropes, n (%)                                                         |                              |                  |
| Dobutamine                                                               |                              |                  |
| Milrinone                                                                |                              |                  |
| Mean arterial pressure, mmHg; mean (SD)                                  |                              |                  |

1  
2  
3 APACHE II, acute physiology and chronic health evaluation II, CABG, coronary artery  
4 bypass grafting; CHF, congestive heart failure; MI, myocardial infarction; PCI, percutaneous  
5 coronary intervention  
6

7  
8 <sup>a</sup>The Clinical Frailty Scale <sup>51</sup> ranges from 1 to 7, with scores of 5-7 denoting frailty.  
9 Scores on the APACHE II <sup>50</sup> range from 0 to 71, with higher scores indicating more severe  
10 disease and a higher risk of death.

11 <sup>b</sup>Scores on the SOFA <sup>23</sup> range from 0 to 24, with higher scores indicating more severe  
12 disease and a higher risk of death.

13 <sup>c</sup>Coronary artery disease included angina and previous MI, PCI, or CABG.

14 <sup>d</sup>The baseline creatine was determined from the outpatient creatinine within the last 12  
15 months and closest to admission (n= ) or, if not available, then the lowest inpatient creatinine  
16 before ICU admission (n= ).  
17  
18  
19  
20  
21  
22  
23  
24  
25  
26  
27  
28  
29  
30  
31  
32  
33  
34  
35  
36  
37  
38  
39  
40  
41  
42  
43  
44  
45  
46  
47  
48  
49  
50  
51  
52  
53  
54  
55  
56  
57  
58  
59  
60

1  
2  
3  
4  
5  
6  
7  
8  
9  
10  
11  
12  
13  
14  
15  
16  
17  
18  
19  
20  
21  
22  
23  
24  
25  
26  
27  
28  
29  
30  
31  
32  
33  
34  
35  
36  
37  
38  
39  
40  
41



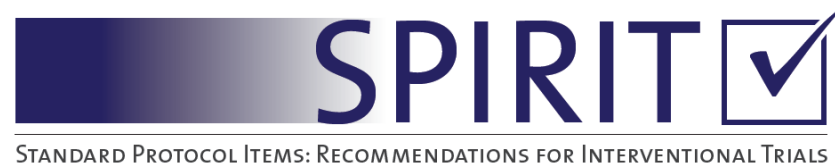

Page numbers refer to the Microsoft Word version of the manuscript (revision 1).

SPIRIT 2013 Checklist: Recommended items to address in a clinical trial protocol and related documents\*

| Section/item                      | Item No | Description                                                                                                                                                                                                                                                                              | Addressed on page number |
|-----------------------------------|---------|------------------------------------------------------------------------------------------------------------------------------------------------------------------------------------------------------------------------------------------------------------------------------------------|--------------------------|
| <b>Administrative information</b> |         |                                                                                                                                                                                                                                                                                          |                          |
| Title                             | 1       | Descriptive title identifying the study design, population, interventions, and, if applicable, trial acronym                                                                                                                                                                             | 1                        |
| Trial registration                | 2a      | Trial identifier and registry name. If not yet registered, name of intended registry                                                                                                                                                                                                     | 4, 21                    |
|                                   | 2b      | All items from the World Health Organization Trial Registration Data Set                                                                                                                                                                                                                 | 4, 21                    |
| Protocol version                  | 3       | Date and version identifier                                                                                                                                                                                                                                                              | 24                       |
| Funding                           | 4       | Sources and types of financial, material, and other support                                                                                                                                                                                                                              | 25                       |
| Roles and responsibilities        | 5a      | Names, affiliations, and roles of protocol contributors                                                                                                                                                                                                                                  | 1, 26                    |
|                                   | 5b      | Name and contact information for the trial sponsor                                                                                                                                                                                                                                       | 25                       |
|                                   | 5c      | Role of study sponsor and funders, if any, in study design; collection, management, analysis, and interpretation of data; writing of the report; and the decision to submit the report for publication, including whether they will have ultimate authority over any of these activities | 26                       |
|                                   | 5d      | Composition, roles, and responsibilities of the coordinating centre, steering committee, endpoint adjudication committee, data management team, and other individuals or groups overseeing the trial, if applicable (see Item 21a for data monitoring committee)                         | 9, 22-23                 |

|    |                                                           |     |                                                                                                               |             |
|----|-----------------------------------------------------------|-----|---------------------------------------------------------------------------------------------------------------|-------------|
| 1  | <b>Introduction</b>                                       |     |                                                                                                               |             |
| 2  |                                                           |     |                                                                                                               |             |
| 3  | Background and                                            | 6a  | Description of research question and justification for undertaking the trial, including summary of relevant   |             |
| 4  | rationale                                                 |     | studies (published and unpublished) examining benefits and harms for each intervention                        | 6-8         |
| 5  |                                                           |     |                                                                                                               |             |
| 6  |                                                           | 6b  | Explanation for choice of comparators                                                                         | 7-8, 11-12  |
| 7  |                                                           |     |                                                                                                               |             |
| 8  | Objectives                                                | 7   | Specific objectives or hypotheses                                                                             | 8           |
| 9  |                                                           |     |                                                                                                               |             |
| 10 | Trial design                                              | 8   | Description of trial design including type of trial (eg, parallel group, crossover, factorial, single group), |             |
| 11 |                                                           |     | allocation ratio, and framework (eg, superiority, equivalence, noninferiority, exploratory)                   | 9           |
| 12 |                                                           |     |                                                                                                               |             |
| 13 |                                                           |     |                                                                                                               |             |
| 14 | <b>Methods: Participants, interventions, and outcomes</b> |     |                                                                                                               |             |
| 15 |                                                           |     |                                                                                                               |             |
| 16 | Study setting                                             | 9   | Description of study settings (eg, community clinic, academic hospital) and list of countries where data will | 9, suppl S1 |
| 17 |                                                           |     | be collected. Reference to where list of study sites can be obtained                                          |             |
| 18 |                                                           |     |                                                                                                               |             |
| 19 | Eligibility criteria                                      | 10  | Inclusion and exclusion criteria for participants. If applicable, eligibility criteria for study centres and  | 9-10        |
| 20 |                                                           |     | individuals who will perform the interventions (eg, surgeons, psychotherapists)                               |             |
| 21 |                                                           |     |                                                                                                               |             |
| 22 | Interventions                                             | 11a | Interventions for each group with sufficient detail to allow replication, including how and when they will be | 10-12       |
| 23 |                                                           |     | administered                                                                                                  |             |
| 24 |                                                           |     |                                                                                                               |             |
| 25 |                                                           | 11b | Criteria for discontinuing or modifying allocated interventions for a given trial participant (eg, drug dose  | 16-17       |
| 26 |                                                           |     | change in response to harms, participant request, or improving/worsening disease)                             |             |
| 27 |                                                           |     |                                                                                                               |             |
| 28 |                                                           | 11c | Strategies to improve adherence to intervention protocols, and any procedures for monitoring adherence        | 16-17       |
| 29 |                                                           |     | (eg, drug tablet return, laboratory tests)                                                                    |             |
| 30 |                                                           |     |                                                                                                               |             |
| 31 |                                                           | 11d | Relevant concomitant care and interventions that are permitted or prohibited during the trial                 | 12-13       |
| 32 |                                                           |     |                                                                                                               |             |
| 33 | Outcomes                                                  | 12  | Primary, secondary, and other outcomes, including the specific measurement variable (eg, systolic blood       |             |
| 34 |                                                           |     | pressure), analysis metric (eg, change from baseline, final value, time to event), method of aggregation (eg, | 13-15       |
| 35 |                                                           |     | median, proportion), and time point for each outcome. Explanation of the clinical relevance of chosen         |             |
| 36 |                                                           |     | efficacy and harm outcomes is strongly recommended                                                            |             |
| 37 |                                                           |     |                                                                                                               |             |
| 38 | Participant timeline                                      | 13  | Time schedule of enrolment, interventions (including any run-ins and washouts), assessments, and visits for   | 33-34       |
| 39 |                                                           |     | participants. A schematic diagram is highly recommended (see Figure)                                          |             |
| 40 |                                                           |     |                                                                                                               |             |
| 41 |                                                           |     |                                                                                                               |             |
| 42 |                                                           |     |                                                                                                               |             |
| 43 |                                                           |     |                                                                                                               |             |
| 44 |                                                           |     |                                                                                                               |             |
| 45 |                                                           |     |                                                                                                               |             |
| 46 |                                                           |     |                                                                                                               |             |

|    |                                                                     |     |                                                                                                                                                                                                                                                                                                                                                                                                              |             |
|----|---------------------------------------------------------------------|-----|--------------------------------------------------------------------------------------------------------------------------------------------------------------------------------------------------------------------------------------------------------------------------------------------------------------------------------------------------------------------------------------------------------------|-------------|
| 1  | Sample size                                                         | 14  | Estimated number of participants needed to achieve study objectives and how it was determined, including clinical and statistical assumptions supporting any sample size calculations                                                                                                                                                                                                                        | 18-19       |
| 2  |                                                                     |     |                                                                                                                                                                                                                                                                                                                                                                                                              |             |
| 3  |                                                                     |     |                                                                                                                                                                                                                                                                                                                                                                                                              |             |
| 4  | Recruitment                                                         | 15  | Strategies for achieving adequate participant enrolment to reach target sample size                                                                                                                                                                                                                                                                                                                          | 21-22       |
| 5  |                                                                     |     |                                                                                                                                                                                                                                                                                                                                                                                                              |             |
| 6  |                                                                     |     |                                                                                                                                                                                                                                                                                                                                                                                                              |             |
| 7  | <b>Methods: Assignment of interventions (for controlled trials)</b> |     |                                                                                                                                                                                                                                                                                                                                                                                                              |             |
| 8  | Allocation:                                                         |     |                                                                                                                                                                                                                                                                                                                                                                                                              |             |
| 9  |                                                                     |     |                                                                                                                                                                                                                                                                                                                                                                                                              |             |
| 10 | Sequence                                                            | 16a | Method of generating the allocation sequence (eg, computer-generated random numbers), and list of any factors for stratification. To reduce predictability of a random sequence, details of any planned restriction (eg, blocking) should be provided in a separate document that is unavailable to those who enrol participants or assign interventions                                                     | 10-11       |
| 11 | generation                                                          |     |                                                                                                                                                                                                                                                                                                                                                                                                              |             |
| 12 |                                                                     |     |                                                                                                                                                                                                                                                                                                                                                                                                              |             |
| 13 |                                                                     |     |                                                                                                                                                                                                                                                                                                                                                                                                              |             |
| 14 |                                                                     |     |                                                                                                                                                                                                                                                                                                                                                                                                              |             |
| 15 |                                                                     |     |                                                                                                                                                                                                                                                                                                                                                                                                              |             |
| 16 | Allocation                                                          | 16b | Mechanism of implementing the allocation sequence (eg, central telephone; sequentially numbered, opaque, sealed envelopes), describing any steps to conceal the sequence until interventions are assigned                                                                                                                                                                                                    | 10-11       |
| 17 | concealment                                                         |     |                                                                                                                                                                                                                                                                                                                                                                                                              |             |
| 18 | mechanism                                                           |     |                                                                                                                                                                                                                                                                                                                                                                                                              |             |
| 19 |                                                                     |     |                                                                                                                                                                                                                                                                                                                                                                                                              |             |
| 20 | Implementation                                                      | 16c | Who will generate the allocation sequence, who will enrol participants, and who will assign participants to interventions                                                                                                                                                                                                                                                                                    | 10-11, 23   |
| 21 |                                                                     |     |                                                                                                                                                                                                                                                                                                                                                                                                              |             |
| 22 |                                                                     |     |                                                                                                                                                                                                                                                                                                                                                                                                              |             |
| 23 |                                                                     |     |                                                                                                                                                                                                                                                                                                                                                                                                              |             |
| 24 | Blinding (masking)                                                  | 17a | Who will be blinded after assignment to interventions (eg, trial participants, care providers, outcome assessors, data analysts), and how                                                                                                                                                                                                                                                                    | 16          |
| 25 |                                                                     |     |                                                                                                                                                                                                                                                                                                                                                                                                              |             |
| 26 |                                                                     |     |                                                                                                                                                                                                                                                                                                                                                                                                              |             |
| 27 |                                                                     | 17b | If blinded, circumstances under which unblinding is permissible, and procedure for revealing a participant's allocated intervention during the trial                                                                                                                                                                                                                                                         | Not blinded |
| 28 |                                                                     |     |                                                                                                                                                                                                                                                                                                                                                                                                              |             |
| 29 |                                                                     |     |                                                                                                                                                                                                                                                                                                                                                                                                              |             |
| 30 |                                                                     |     |                                                                                                                                                                                                                                                                                                                                                                                                              |             |
| 31 | <b>Methods: Data collection, management, and analysis</b>           |     |                                                                                                                                                                                                                                                                                                                                                                                                              |             |
| 32 |                                                                     |     |                                                                                                                                                                                                                                                                                                                                                                                                              |             |
| 33 | Data collection                                                     | 18a | Plans for assessment and collection of outcome, baseline, and other trial data, including any related processes to promote data quality (eg, duplicate measurements, training of assessors) and a description of study instruments (eg, questionnaires, laboratory tests) along with their reliability and validity, if known. Reference to where data collection forms can be found, if not in the protocol | 15-16       |
| 34 | methods                                                             |     |                                                                                                                                                                                                                                                                                                                                                                                                              |             |
| 35 |                                                                     |     |                                                                                                                                                                                                                                                                                                                                                                                                              |             |
| 36 |                                                                     |     |                                                                                                                                                                                                                                                                                                                                                                                                              |             |
| 37 |                                                                     |     |                                                                                                                                                                                                                                                                                                                                                                                                              |             |
| 38 |                                                                     |     |                                                                                                                                                                                                                                                                                                                                                                                                              |             |
| 39 |                                                                     | 18b | Plans to promote participant retention and complete follow-up, including list of any outcome data to be collected for participants who discontinue or deviate from intervention protocols                                                                                                                                                                                                                    | 23-24       |
| 40 |                                                                     |     |                                                                                                                                                                                                                                                                                                                                                                                                              |             |
| 41 |                                                                     |     |                                                                                                                                                                                                                                                                                                                                                                                                              |             |
| 42 |                                                                     |     |                                                                                                                                                                                                                                                                                                                                                                                                              |             |



|    |                                 |     |                                                                                                                                                                                                                                                                                                                                       |       |
|----|---------------------------------|-----|---------------------------------------------------------------------------------------------------------------------------------------------------------------------------------------------------------------------------------------------------------------------------------------------------------------------------------------|-------|
| 1  | Data management                 | 19  | Plans for data entry, coding, security, and storage, including any related processes to promote data quality (eg, double data entry; range checks for data values). Reference to where details of data management procedures can be found, if not in the protocol                                                                     | 21    |
| 2  |                                 |     |                                                                                                                                                                                                                                                                                                                                       |       |
| 3  |                                 |     |                                                                                                                                                                                                                                                                                                                                       |       |
| 4  |                                 |     |                                                                                                                                                                                                                                                                                                                                       |       |
| 5  | Statistical methods             | 20a | Statistical methods for analysing primary and secondary outcomes. Reference to where other details of the statistical analysis plan can be found, if not in the protocol                                                                                                                                                              | 19-21 |
| 6  |                                 |     |                                                                                                                                                                                                                                                                                                                                       |       |
| 7  |                                 |     |                                                                                                                                                                                                                                                                                                                                       |       |
| 8  |                                 | 20b | Methods for any additional analyses (eg, subgroup and adjusted analyses)                                                                                                                                                                                                                                                              | 19-21 |
| 9  |                                 |     |                                                                                                                                                                                                                                                                                                                                       |       |
| 10 |                                 | 20c | Definition of analysis population relating to protocol non-adherence (eg, as randomised analysis), and any statistical methods to handle missing data (eg, multiple imputation)                                                                                                                                                       | 19-21 |
| 11 |                                 |     |                                                                                                                                                                                                                                                                                                                                       |       |
| 12 |                                 |     |                                                                                                                                                                                                                                                                                                                                       |       |
| 13 |                                 |     |                                                                                                                                                                                                                                                                                                                                       |       |
| 14 | <b>Methods: Monitoring</b>      |     |                                                                                                                                                                                                                                                                                                                                       |       |
| 15 |                                 |     |                                                                                                                                                                                                                                                                                                                                       |       |
| 16 | Data monitoring                 | 21a | Composition of data monitoring committee (DMC); summary of its role and reporting structure; statement of whether it is independent from the sponsor and competing interests; and reference to where further details about its charter can be found, if not in the protocol. Alternatively, an explanation of why a DMC is not needed | 22-23 |
| 17 |                                 |     |                                                                                                                                                                                                                                                                                                                                       |       |
| 18 |                                 |     |                                                                                                                                                                                                                                                                                                                                       |       |
| 19 |                                 |     |                                                                                                                                                                                                                                                                                                                                       |       |
| 20 |                                 |     |                                                                                                                                                                                                                                                                                                                                       |       |
| 21 |                                 |     |                                                                                                                                                                                                                                                                                                                                       |       |
| 22 |                                 | 21b | Description of any interim analyses and stopping guidelines, including who will have access to these interim results and make the final decision to terminate the trial                                                                                                                                                               | 19    |
| 23 |                                 |     |                                                                                                                                                                                                                                                                                                                                       |       |
| 24 |                                 |     |                                                                                                                                                                                                                                                                                                                                       |       |
| 25 | Harms                           | 22  | Plans for collecting, assessing, reporting, and managing solicited and spontaneously reported adverse events and other unintended effects of trial interventions or trial conduct                                                                                                                                                     | 14-15 |
| 26 |                                 |     |                                                                                                                                                                                                                                                                                                                                       |       |
| 27 |                                 |     |                                                                                                                                                                                                                                                                                                                                       |       |
| 28 | Auditing                        | 23  | Frequency and procedures for auditing trial conduct, if any, and whether the process will be independent from investigators and the sponsor                                                                                                                                                                                           | 21-22 |
| 29 |                                 |     |                                                                                                                                                                                                                                                                                                                                       |       |
| 30 |                                 |     |                                                                                                                                                                                                                                                                                                                                       |       |
| 31 |                                 |     |                                                                                                                                                                                                                                                                                                                                       |       |
| 32 | <b>Ethics and dissemination</b> |     |                                                                                                                                                                                                                                                                                                                                       |       |
| 33 |                                 |     |                                                                                                                                                                                                                                                                                                                                       |       |
| 34 | Research ethics approval        | 24  | Plans for seeking research ethics committee/institutional review board (REC/IRB) approval                                                                                                                                                                                                                                             | 23    |
| 35 |                                 |     |                                                                                                                                                                                                                                                                                                                                       |       |
| 36 |                                 |     |                                                                                                                                                                                                                                                                                                                                       |       |
| 37 | Protocol amendments             | 25  | Plans for communicating important protocol modifications (eg, changes to eligibility criteria, outcomes, analyses) to relevant parties (eg, investigators, REC/IRBs, trial participants, trial registries, journals, regulators)                                                                                                      | 23    |
| 38 |                                 |     |                                                                                                                                                                                                                                                                                                                                       |       |
| 39 |                                 |     |                                                                                                                                                                                                                                                                                                                                       |       |
| 40 |                                 |     |                                                                                                                                                                                                                                                                                                                                       |       |
| 41 |                                 |     |                                                                                                                                                                                                                                                                                                                                       |       |
| 42 |                                 |     |                                                                                                                                                                                                                                                                                                                                       |       |
| 43 |                                 |     |                                                                                                                                                                                                                                                                                                                                       |       |
| 44 |                                 |     |                                                                                                                                                                                                                                                                                                                                       |       |
| 45 |                                 |     |                                                                                                                                                                                                                                                                                                                                       |       |
| 46 |                                 |     |                                                                                                                                                                                                                                                                                                                                       |       |

|    |                               |     |                                                                                                                                                                                                                                                                                     |          |
|----|-------------------------------|-----|-------------------------------------------------------------------------------------------------------------------------------------------------------------------------------------------------------------------------------------------------------------------------------------|----------|
| 1  | Consent or assent             | 26a | Who will obtain informed consent or assent from potential trial participants or authorised surrogates, and how (see Item 32)                                                                                                                                                        | 23       |
| 2  |                               |     |                                                                                                                                                                                                                                                                                     |          |
| 3  |                               |     |                                                                                                                                                                                                                                                                                     |          |
| 4  |                               | 26b | Additional consent provisions for collection and use of participant data and biological specimens in ancillary studies, if applicable                                                                                                                                               | 23       |
| 5  |                               |     |                                                                                                                                                                                                                                                                                     |          |
| 6  |                               |     |                                                                                                                                                                                                                                                                                     |          |
| 7  | Confidentiality               | 27  | How personal information about potential and enrolled participants will be collected, shared, and maintained in order to protect confidentiality before, during, and after the trial                                                                                                | 24       |
| 8  |                               |     |                                                                                                                                                                                                                                                                                     |          |
| 9  |                               |     |                                                                                                                                                                                                                                                                                     |          |
| 10 | Declaration of interests      | 28  | Financial and other competing interests for principal investigators for the overall trial and each study site                                                                                                                                                                       | 25       |
| 11 |                               |     |                                                                                                                                                                                                                                                                                     |          |
| 12 |                               |     |                                                                                                                                                                                                                                                                                     |          |
| 13 | Access to data                | 29  | Statement of who will have access to the final trial dataset, and disclosure of contractual agreements that limit such access for investigators                                                                                                                                     | 24       |
| 14 |                               |     |                                                                                                                                                                                                                                                                                     |          |
| 15 |                               |     |                                                                                                                                                                                                                                                                                     |          |
| 16 | Ancillary and post-trial care | 30  | Provisions, if any, for ancillary and post-trial care, and for compensation to those who suffer harm from trial participation                                                                                                                                                       | 24       |
| 17 |                               |     |                                                                                                                                                                                                                                                                                     |          |
| 18 |                               |     |                                                                                                                                                                                                                                                                                     |          |
| 19 |                               |     |                                                                                                                                                                                                                                                                                     |          |
| 20 | Dissemination policy          | 31a | Plans for investigators and sponsor to communicate trial results to participants, healthcare professionals, the public, and other relevant groups (eg, via publication, reporting in results databases, or other data sharing arrangements), including any publication restrictions | 24       |
| 21 |                               |     |                                                                                                                                                                                                                                                                                     |          |
| 22 |                               |     |                                                                                                                                                                                                                                                                                     |          |
| 23 |                               |     |                                                                                                                                                                                                                                                                                     |          |
| 24 |                               | 31b | Authorship eligibility guidelines and any intended use of professional writers                                                                                                                                                                                                      | 24       |
| 25 |                               |     |                                                                                                                                                                                                                                                                                     |          |
| 26 |                               | 31c | Plans, if any, for granting public access to the full protocol, participant-level dataset, and statistical code                                                                                                                                                                     | 24       |
| 27 |                               |     |                                                                                                                                                                                                                                                                                     |          |
| 28 |                               |     |                                                                                                                                                                                                                                                                                     |          |
| 29 | <b>Appendices</b>             |     |                                                                                                                                                                                                                                                                                     |          |
| 30 |                               |     |                                                                                                                                                                                                                                                                                     |          |
| 31 | Informed consent materials    | 32  | Model consent form and other related documentation given to participants and authorised surrogates                                                                                                                                                                                  | Suppl S4 |
| 32 |                               |     |                                                                                                                                                                                                                                                                                     |          |
| 33 |                               |     |                                                                                                                                                                                                                                                                                     |          |
| 34 | Biological specimens          | 33  | Plans for collection, laboratory evaluation, and storage of biological specimens for genetic or molecular analysis in the current trial and for future use in ancillary studies, if applicable                                                                                      | 15-16    |
| 35 |                               |     |                                                                                                                                                                                                                                                                                     |          |
| 36 |                               |     |                                                                                                                                                                                                                                                                                     |          |

\*It is strongly recommended that this checklist be read in conjunction with the SPIRIT 2013 Explanation & Elaboration for important clarification on the items. Amendments to the protocol should be tracked and dated. The SPIRIT checklist is copyrighted by the SPIRIT Group under the Creative Commons [“Attribution-NonCommercial-NoDerivs 3.0 Unported”](https://creativecommons.org/licenses/by-nc-nd/3.0/) license.

**Online supplementary file S2 OVATION-65 team members****Executive Committee**

Neill KJ Adhikari (PI, co-chair), François Lamontagne (PI, co-chair), M. Elizabeth Wilcox, (PI) Marie-Claude Battista (co-I), Marie-Hélène Masse (PL)

**Data Safety Monitoring Committee**

Andreas Laupacis (chair), Lauren Griffith, Scott Halpern

**Coordinating Centre Personnel**

Marie-Claude Battista, Marie-Hélène Masse, Louise Robert-Petit, Marie-Ève Thibault

**Contributors to ancillary studies**

François-Michel Boisvert, Lee Hwa Tai, Jean-Luc Parent, Xavier Roucou

**Participating Clinical Site Personnel**

*CIUSSS de l'Estrie – Centre Hospitalier Universitaire de Sherbrooke*

François Lamontagne (PI), Frédérick D'Aragnon (Co-I), Marc-André Leclair (Co-I), Michaël Mayette (Co-I), Yannick Poulin (Co-I), Hector Quiroz-Martinez (Co-I), Charles St-Arnaud (Co-I), Éline Carbonneau (RC), Line Côté (RC), Marilène Ladouceur (RC), Joannie Marchand (RA), Marie-Hélène Masse (RC), Noémie Turcotte (RA)

*Centre Hospitalier de l'Université de Montréal*

Michaël Chassé (PI), Martine Lebrasseur (RC), Fatna Benettaib (RC), Dounia Boumahni (RC), Marie-Ève Cantin (RA), Ali Ghamraoui (RC), Maya Salame (RC)

*The Ottawa Hospital (General Campus and Civic Campus)*

Andrew Seely (PI), Irene Watpool (RC), Rebecca Porteous (RC), Sydney Miezeitis (RA)

*Sunnybrook Health Sciences Centre*

Neill KJ Adhikari (PI), Andre Carlos Amaral (Co-I), Brian Cuthbertson (Co-I), Robert Fowler (Co-I), Damon Scales (Co-I), Nicole Marinoff (RC), Navjot Kaur (RC), Wael Mohammed (RC)

*Centre Hospitalier Universitaire de Québec-Université Laval*

François Lauzier (PI), Alexis Turgeon (Co-I), Charles Francoeur (Co-I), Guillaume Leblanc (Co-I), David Bellemare (RC), Olivier Costerousse (RC), Stéphanie Grenier (RA), Gabrielle Guilbault (RA), Marjorie Daigle (RA), Ève Cloutier (RA), Isabelle St-Hilaire (RA).

*Mount Sinai Hospital*

Sangeeta Mehta (PI), Laveena Munshi (Co-I), Sumesh Shah (RC)

*Toronto Western Hospital*

Elizabeth Wilcox (PI), Jeffrey Singh (Co-I), Karolina Walczak (RC)

*Juravinski Hospital* (activation in progress and no patients enrolled at the time of manuscript submission)

Bram Rochweg (PI), Tina Millen (RC)

**Abbreviations:**

Co-I – co-investigator; PI – principal investigator; PL – project leader; RA – research assistant; RC – research coordinator

**Online supplementary file S3 OVATION-65 ancillary studies**

| <b>Study title</b>                                                                                                                                         | <b>Investigators</b>                                                                         | <b>Primary objective</b>                                                                                              | <b>Secondary objective</b>                                                                                                                                                                                                                                         | <b>Funding</b>                                     |
|------------------------------------------------------------------------------------------------------------------------------------------------------------|----------------------------------------------------------------------------------------------|-----------------------------------------------------------------------------------------------------------------------|--------------------------------------------------------------------------------------------------------------------------------------------------------------------------------------------------------------------------------------------------------------------|----------------------------------------------------|
| Measuring baseline ascorbic acid levels in the OVATION-65 trial                                                                                            | MC Battista<br>NK Adhikari<br>F Lamontagne                                                   | Measure the association between baseline plasma ascorbic acid and markers of organ injury                             | Measure the association between baseline ascorbic acid and<br>1) hourly MAP to vasopressor dose ratio;<br>2) biomarkers of inflammation (IL-1 $\beta$ , TNF- $\alpha$ , C-reactive protein)<br>3) biomarkers of endothelial injury (thrombomodulin, angiotensin-2) | Lotte and John Hecht Memorial Foundation           |
| Urinary biomarkers of renal injury in the OVATION-65 trial: a Nested analysis of the urinary proteome                                                      | FM Boisvert<br>MC Battista<br>NK Adhikari<br>F Lamontagne                                    | Identify peptides and proteins expressed in the urine of OVATION-65 participants using a discovery proteomic approach | Measure the association between protein clusters and renal function                                                                                                                                                                                                | Université de Sherbrooke/<br>Merck Sharp and Dohme |
| Effects of catecholamine therapy on the immune system: unsuspected consequences of routine medical interventions and opportunities for individualized care | FM Boisvert<br>LH Tai<br>JL Parent<br>X Roucou<br>MC Battista<br>NK Adhikari<br>F Lamontagne | Evaluate the effects of exogenous catecholamines on plasma Th1/Th2 profiles (plasma cytokines and flow cytometry)     | Evaluate the effects of exogenous catecholamines on<br>1) Expression and activation of peripheral blood mononuclear cell adrenergic receptors;<br>2) Distinct proteomic signatures                                                                                 | Université de Sherbrooke/<br>Merck Sharp and Dohme |

## RESEARCH INFORMATION AND CONSENT FORM

**Study Title:** The OVATION-65- Impact of permissive hypotension on end-organ damage in the elderly

**Study Number and Date:** MP-31-2018-1789

**Funding Agencies:** Centre de recherche du CHUS  
Université de Sherbrooke

**Principal Investigator:** Dr. François Lamontagne, Intensivist

**Co-Investigators:** Dr. Frédérick D'Aragon, Intensivist,  
Dr. Charles St-Arnaud, Intensivist  
Dr. Michaël Mayette, Intensivist,

### FOR INFORMATION

**Monday through Friday, from 8 am and 4 pm, you can reach:**

|                                          |                                |
|------------------------------------------|--------------------------------|
| Dr. François Lamontagne, Intensivist     | Tel.: 819-346-1110, ext. 74974 |
| Élaine Carbonneau, Research Coordinator  | Tel.: 819-346-1110, ext. 16208 |
| Marie-Hélène Masse, Research Coordinator | Tel.: 819-346-1110, ext. 14173 |
| Marilène Ladouceur, Research Assistant   | Tel.: 819-346-1110, ext. 14169 |

or dial "0" and ask the operator to call them on pager # 7125.

We are seeking your participation (or that of your family member) in a research study because you (or your family member) have been admitted to an intensive care unit and will need medication administered into your veins to raise your blood pressure. However, before you agree to participate, please take the time to read, understand and carefully consider the following information. If you agree to take part in this research study, you will be asked to sign the consent form at the end of this document and we will give you a signed copy for your own records.

This Information and Consent Form explains the goals, procedures, risks and inconveniences, and benefits of the study as well as providing the names of the people to reach if needed. This document may contain information or words that you do not understand. Please ask the study investigator or members of the study staff to answer your questions and explain any word or information you do not understand.

### NATURE AND GOALS OF THE RESEARCH STUDY

This study aims to determine whether the target blood pressure used to adjust the dosage of the blood-pressure-increasing medication changes the evolution of participants treated in the Intensive Care Unit (ICU). Vasopressors are drugs that are given intravenously to increase the blood pressure of patients with diseases causing dangerous pressure drops that can be harmful to the organs of the body. When a doctor

1  
2 prescribes a vasopressor, he asks that the dose be adjusted to achieve a specific blood  
3 pressure. However, although vasopressors have been used for nearly a century, we still  
4 do not know whether it is preferable to try and normalize the blood pressure of our  
5 patients (which requires high doses of vasopressors) or tolerate a lower pressure (which  
6 is not normal, but requires smaller doses of drugs). The current practice is quite  
7 variable, some doctors preferring to increase the blood pressure, others preferring to  
8 restrict doses of these powerful drugs and tolerate a lower blood pressure  
9 (hypotension).  
10

11  
12 The goal of this study is to determine if tolerating a lower mean blood pressure  
13 (permissive hypotension) vs. usual blood pressure targets in hypotensive patients over  
14 65 years of age can reduce the risk of harm associated with more aggressive  
15 vasopressor therapy. The specific objectives are to evaluate: the effect of permissive  
16 hypotension on your health status after 6 months, the effects on markers of organ  
17 injury, including the heart, brain, kidneys, liver, intestine, and skeletal muscles as well  
18 as the effects on your immune system. We wish to recruit around 100 participants at the  
19 *CIUSSS de l'Estrie - CHUS* to be among the 200 participants needed for this study that  
20 will be carried out in several hospitals.  
21

22  
23 Your physician has determined that you are eligible to participate in our study and you  
24 have been selected as a participant because you are being (or will soon be) treated in  
25 the ICU and because you were prescribed vasopressor drugs.  
26

## 27 **RESEARCH STUDY PROCEDURES**

28 If you agree to participate in this study, you (or your family member) will be assigned to  
29 one of the following two groups: The first group includes participants who are being  
30 given vasopressors for an average blood pressure of 60-65 mmHg (limiting the amount  
31 of vasopressors given); the second group includes participants who are receiving  
32 vasopressors following usual care. Your assignment to one of these two groups was  
33 determined randomly by a computer that will not retain information about you. The odds  
34 of being assigned to either group were 50% (1 in 2 chances or half-and-half). The  
35 treating team will be aware of which group you have been assigned to.  
36  
37

38 As a study participant, you will receive vasopressors to maintain your average blood  
39 pressure at the level of your assigned group. These pressure targets will remain the  
40 same throughout your treatment with this type of medication (vasopressors) until you  
41 are discharged from hospital or up to 28 days from the beginning of your participation,  
42 whichever event comes first. Also, on days 1, 3 and 7 of participation (or when you are  
43 discharged from the intensive care unit), your nurse will collect 30 ml of blood (6  
44 teaspoons) as well as urine samples while taking the blood samples required for your  
45 medical follow-up. We will collect a little more volume than what is needed in order to  
46 compensate for unexpected losses that may arise during laboratory testing. These  
47 samples will enable us to measure certain biomarkers in your blood and in your urine  
48 that help assess the function of your heart, kidneys, muscles, brain and liver as well as  
49 your immune system. These biomarkers are already known to be useful in clinical  
50 studies and are not genetic biomarkers. During your hospital stay, we will monitor your  
51 progress to see if your organs are functioning well, if you develop other health problems  
52 and how long you will stay in the ICU and hospital. Your medical chart will be reviewed,  
53 by the investigator and the research team as long as you remain in the study. Blood test  
54 results and procedures present in your medical record will be collected for the study.  
55  
56  
57  
58  
59

1  
2 After you are discharged from the hospital, you will be contacted by phone 6 monthss  
3 after the start of your participation in the study. Your contact information will be provided  
4 to the coordinating research team.  
5

### 6 7 **FUTURE ANALYSES**

8 Once the biomarker analyses have been performed as part of this study, it is possible  
9 that part of your samples may be unused. We wish to use the remainder of your  
10 samples (blood and urine) in order to answer additional questions concerning the  
11 impact of vasopressors on blood pressure targets that may arise in future. For example,  
12 we could measure a new, as yet undefined, biomarker. Only the remainder of your  
13 samples will be used and no other additional sample will be collected. At the end of the  
14 study, if some of the samples remain unused, they will be destroyed unless you agree  
15 to biobanking. A separate consent form will be presented for biobanking.  
16  
17

### 18 19 **RISKS ASSOCIATED WITH PARTICIPATION IN THIS RESEARCH STUDY**

20 Vasopressors used in this study and that you have received or may still be receiving,  
21 are approved in Canada and commonly used in the ICUs of all hospitals. The blood  
22 pressure targets we aim for in this study are also part of current medical practices.

23 Since your health condition required treatment with vasopressors, and continues to  
24 require treatment at this time, to our knowledge, you are exposed to the same risks,  
25 whether or not you participate in this study.  
26  
27

### 28 29 **INCONVENIENCES ASSOCIATED WITH PARTICIPATION IN THE STUDY**

30 Other than the risks described above, you (or your family member) shouldn't experience  
31 any other inconveniences.  
32

### 33 34 **BENEFITS ASSOCIATED WITH YOUR PARTICIPATION IN THE RESEARCH STUDY**

35 You (or your family member) will not personally benefit from your participation in this  
36 research study. However, the findings from this study may help increase our knowledge  
37 of pressure targets, vasopressors and biomarkers. The information obtained through  
38 this study could be useful to other patients in the future.  
39

### 40 41 **ALTERNATIVES TO YOUR PARTICIPATION IN THIS RESEARCH STUDY**

42 You (or to your family member) do not have to participate in this research study to be  
43 treated for your disease.  
44

### 45 46 **VOLUNTARY PARTICIPATION AND THE RIGHT TO WITHDRAW**

47 Your participation in this research study is voluntary. Therefore, you may refuse to  
48 participate. You can also withdraw from the study at any time, without providing a  
49 reason, by informing the study investigator or one of his assistants.

50 Your decision not to participate in the study or to withdraw from it, will have no impact  
51 on the quality of care and services you (or your family member) are entitled to or on  
52 your relationship with the investigator and other stakeholders.

53 The study investigator, the funding agency or the Research Ethics Board may put an  
54 end your participation in the study without your consent. This may happen if new  
55 scientific developments show that participation is no longer in your interest; if the study  
56 investigator believes it is in your best interest; or if there are administrative reasons to  
57 terminate the study.  
58

1  
2 If you withdraw or are withdrawn from the study, the information and material already  
3 collected during the course of the study will be stored, analyzed or used to ensure the  
4 integrity of the study.  
5

6 Any new study findings that could influence your decision to remain in the research  
7 study will be shared with you as soon as possible.  
8

### 9 **CONFIDENTIALITY**

10 While you take part in this research study, the study investigator and study staff will  
11 collect and record information about you in a study file. Only the information needed to  
12 meet the scientific goals of the study will be collected.  
13

14 This information could include data taken from your medical record concerning your  
15 past and present medical history, your lifestyle and the test results, exams and  
16 procedures you will undergo during the study.  
17

18 All the information collected during the study will remain strictly confidential to the extent  
19 provided by law. To protect your identity and privacy, you will be identified by an  
20 alphanumeric code. The key linking your identity and your research file will be kept in a  
21 safe place by the study investigator.  
22

23 To ensure your safety, a mention of your participation in this research project will be  
24 included in your medical file. Therefore, any person or company to whom you will give  
25 access to your medical file will have access to this information.  
26

27 Your full name and your phone number will be transmitted to a qualified person of the  
28 coordinating center of the study in order to allow this person to contact you in 6 months  
29 by phone. This personal information will allow a direct identification. This information will  
30 be kept in security and confidentiality will be preserved by the qualified person and  
31 destroyed at the end of the follow-up.  
32

33 Study results will be stored by the study investigator for 25 years.  
34

35 Study results may be published in medical journals or discussed at scientific meetings,  
36 but it will be impossible to identify participants.  
37

38 For monitoring and control purposes, your study file and medical records may be  
39 examined by a representative of the Research Ethics Board or of the institution or by a  
40 person mandated by a regulatory authority. All of these individuals and organizations  
41 adhere to confidentiality policies.  
42

43 You have the right to consult your study file at any time in order to verify the information  
44 gathered and to have it corrected, if necessary, for as long as this information is  
45 available to the study investigator or the institution. However, some of this information  
46 may be made available to you only once the study has ended, in order to protect the  
47 scientific integrity of the study.  
48  
49

### 50 **COMPENSATION**

51 You (or your family member) will not receive any compensation for expenses and  
52 inconveniences incurred due to your participation in this research study.  
53  
54  
55  
56  
57  
58  
59  
60



**SHOULD YOU SUFFER ANY HARM**

Should you suffer any harm due to your participation in this research study, you will be provided with all the necessary care and services, at no cost to you.

By agreeing to take part in this study, you are not waiving any of your legal rights nor discharging the study investigators, the sponsor or the institution where this research study is being conducted of their civil liability and professional responsibilities.

**FUNDING OF THE RESEARCH STUDY**

The study investigator has received funding from the grant agency to carry out this study.

**CONTACT PERSONS**

If you have any questions regarding your participation in this research study, please refer to the box on page 1.

If you have any questions regarding your rights as a participant in this study, if you have any comments or you wish to file a complaint, you may contact the *Bureau des plaintes et de la qualité des services of the CIUSSS de l'Estrie-CHUS* at the following number: 1-866-917-7903.

**MONITORING OF ETHICAL ASPECTS OF THE STUDY**

The *Comité d'éthique de la recherche du CIUSSS de l'Estrie - CHUS* has approved this study and is responsible for monitoring it at all participating institutions throughout Québec's health and social service network.

If you wish to reach a member of the Research Ethics Board (REB), please contact the *Service de soutien à l'éthique de la recherche du CIUSSS de l'Estrie - CHUS* at the following number: 819-346-1110, ext. 12856.

---

The OVATION-65- Impact of permissive hypotension on end-organ damage in the elderly

---

**CONSENT**

I declare that I have read this Information and Consent Form. I declare that the research study has been explained to me, that my questions were answered to my satisfaction and that I was given sufficient time for consideration and to make a decision. Upon reflection, I agree to participate in this research study under the conditions stated therein.

I agree that the remainder of the samples may be used for additional analyses that may arise during the study (future analyses).  YES  NO

---

|                                              |                          |      |
|----------------------------------------------|--------------------------|------|
| Name of participant<br><i>(please print)</i> | Signature of participant | Date |
|----------------------------------------------|--------------------------|------|

I have explained the research study and this Information and Consent Form and I have answered all of his/her questions.

---

|                                                              |                                          |      |
|--------------------------------------------------------------|------------------------------------------|------|
| Name of person<br>obtaining consent<br><i>(please print)</i> | Signature of person<br>obtaining consent | Date |
|--------------------------------------------------------------|------------------------------------------|------|

**CONSENT FROM LEGAL REPRESENTATIVE (SUDDEN INCAPACITY)**

Because Mr./Mrs. \_\_\_\_\_ has suddenly become incapable of giving consent for the hereinafter mentioned reason, the Civil Code of Québec allows you to give consent for him/her as his/her \_\_\_\_\_ (indicate your relationship with the participant).

As soon as Mr./Mrs. \_\_\_\_\_ has sufficiently recovered, he/she will be asked to sign his/her own consent form to indicate whether he/she wants to continue taking part in this study.

**REASON FOR THE PARTICIPANT NOT BEING ABLE TO GIVE CONSENT**

By signing this page, I confirm that I have read the information in this Consent Form. I acknowledge that the study has been explained to me, that all of my questions have been answered and that I was given enough time to make a decision. I voluntarily give my consent so that Mr./Mrs. \_\_\_\_\_ can participate in this study.

I also agree that the remainder of the samples may be used for additional analyses that may arise during the study (future analyses).  YES  NO

| Name of legal representative<br>(please print) | Signature of legal representative | Date |
|------------------------------------------------|-----------------------------------|------|
|                                                |                                   |      |

I have explained the research study and this Consent Form to the participant's legal representative. I have answered all of his/her questions.

| Name of person<br>obtaining consent<br>(please print) | Signature of person<br>obtaining consent | Date |
|-------------------------------------------------------|------------------------------------------|------|
|                                                       |                                          |      |

**CONSENT FROM THE LEGAL REPRESENTATIVE OR CAREGIVER SUPPORTING THE PARTICIPATION OF THE PERMANENTLY INCAPABLE PARTICIPANT (PERMANENT INCAPACITY)**

I declare that I have read this Information and Consent Form. I declare that the research study has been explained to me, that my questions were answered to my satisfaction and that I was given sufficient time for consideration and to make a decision.

I agree that \_\_\_\_\_ can participate in this research study under the conditions stated therein. I will receive a signed and dated copy of this Information and Consent Form.

I also agree that the remainder of the samples may be used for additional analyses that may arise during the study (future analyses).  YES  NO

If the incapacitated participant is represented:

\_\_\_\_\_  
Name and signature of the legal representative (representative, curator or mandatary) Date

If the incapacitated participant is not represented by a legal representative:

\_\_\_\_\_  
Name and signature of the spouse, failing which, name of next-of-kin or name of a significant person Date

I have explained the research study and this Consent Form to the participant's legal representative. I have answered all his/her questions.

\_\_\_\_\_  
Name of person obtaining consent (please print) Signature of person obtaining consent Date

**PHONE CONSENT**

(For the participant who is suddenly or permanently incapacitated)

Because Mr./Mrs. \_\_\_\_\_ is incapable of giving consent for the hereinafter mentioned reason,

REASON FOR THE PARTICIPANT NOT BEING ABLE TO GIVE CONSENT

\_\_\_\_\_

I have explained the research study and this Consent Form to the participant's legal representative. I have answered all his/her questions.

The representative, Mr./Mrs. \_\_\_\_\_  
 Name of the legal representative (representative, curator or mandatary)  
 Name of the spouse or next-of-kin or  
 Name of the significant person

has given consent by phone on \_\_\_\_\_ at \_\_\_\_\_  
 Date Hour

The representative also agrees that the remainder of the samples may be used for additional analyses that may arise during the study (future analyses).  YES  NO

\_\_\_\_\_  
 Name of person  
 obtaining consent  
*(please print)*

\_\_\_\_\_  
 Signature of person  
 obtaining consent

\_\_\_\_\_  
 Date

## APPENDIX 1: GENETIC PHASE

**(PLEASE NOTE: This part of the consent should not appear in the patient's medical file)**

We invite you to participate in the genetic component of this study. This phase is optional. You may refuse this proposal and still participate in the main phase of the project.

Please note that all sections of the main consent form apply to this appendix as well.

Genetics focuses on cells in the human body that contain a type of molecule called deoxyribonucleic acid commonly referred to as "DNA". Your DNA is contained in the inherited genes that control your entire body's growth, development and functions. For instance, some genes determine the colour of your eyes or hair. DNA presents a wide array of differences or variations from one person to another. These variations may affect the risk of contracting a disease (or not) or the way individuals respond differently to a drug. The OVATION-65 project also includes a genetic sub-study focusing on the analysis of certain genes (genetics) and certain phenomena present in your environment that modify your DNA (epigenetics). These tests can be performed on the cells in your blood.

The markers of the heart, brain, kidneys, liver, intestine and skeletal muscles that we are interested in measuring as part of the OVATION-65 study as well as the molecules (receptors) that enable the vasopressors to act (beta-adrenergic receptors) on the cells of different organs are determined in part by genes. Thus, in order to better understand how to reduce organ damage related to medication (vasopressors) received during intensive care unit admissions, we propose to study the DNA as well as the variations around this DNA (called epigenetic variations) of patients included in OVATION-65. Our goal is to demonstrate that modifications in the DNA of studied markers are associated with the levels of these same blood or urine markers, which inform us on the function/involvement of the targeted organ.

If you agree to participate, we will use a portion of the samples already collected as part of the main project and an additional sample (approximately 2 teaspoons) to conduct our genetic analyses.

### FUTURE ANALYSIS

Once the genetic analyses have been conducted, it is possible that a portion of the samples will remain unused. We would like to use the remainder of your samples to answer additional research questions that might arise during the course of the study. Only the remainder of your samples will be used and no other additional samples will be taken. At the end of the study, if some samples remain unused, they will be destroyed unless you agree to biobanking. Another consent form will be presented for biobanking.

## **SOCIO-ECONOMIC RISKS ASSOCIATED WITH PARTICIPATION IN THIS PHASE OF THE STUDY**

One of the risks associated with genetic analyses is related to the disclosure of results or of your participation to third parties. Protection against genetic discrimination is not currently well defined in Canadian and Québec legislation. Thus, we cannot fully guarantee that your participation in a genetics research project will not have an impact on your chances of getting certain jobs, or of getting insurance coverage (life insurance, disability or health) for you or for members of your family.

However, as researchers, we are committed not to disclose information related to genetic results to any third party. Your results will not be made available to third parties such as an employer, a government agency, an insurer or an educational institution. This also applies to your spouse, other members of your family and your doctor. Furthermore, rest assured that no data related to any genetic results will be included in your hospital record.

## **VOLUNTARY PARTICIPATION AND THE RIGHT TO WITHDRAW FROM THE GENETIC PHASE OF THE PROJECT**

Your participation in the genetic phase of the project is voluntary. Therefore, you may refuse to participate. You may also withdraw your consent from the genetic phase of this research project at any time. Just call the ICU research team at 346-1110 ext. 14171.

Your decision to refuse to participate in this sub-study of the project will have no impact on the quality of the care that will be provided to you or on your relationship with the healthcare team.

If you decide to terminate your participation in the genetic sub-study after providing a sample, you must notify the research team that will then destroy your sample. If your sample has already been tested and the results are already included in an analysis or publication, it will not be possible to remove this information. However, the rest of your sample will be destroyed and no further analysis will be done on your sample.

## **CONFIDENTIALITY**

### Identification:

In order to protect your identity, your samples will be identified by a unique code. Your name and your file number will not appear on the samples. The study investigator will keep a list of patients with the code numbers to identify them. This list is kept under lock and key in the research nurse's office and will not be disclosed under any circumstances.

### Storage and destruction of samples:

Your samples will be kept in the principal investigator's freezers until the end of the study, unless you agree to biobanking. Another consent form will be presented to this end. The principal investigator is responsible for the destruction of samples.

## **COMMUNICATION OF RESULTS**

Your participation and the results of the genetic analysis conducted on your samples will not be disclosed to you or to your doctor.

**MARKETING POSSIBILITIES / WAIVER**

Your participation in the genetic phase of this project could lead to the creation of commercial or other products that could potentially be protected by patents or other intellectual property rights. However, you will not receive any financial benefits.

**CONSENT (GENETIC SUB-STUDY)**

I declare that I have read this Appendix (genetic sub-study). I acknowledge that this sub-study of the project was explained to me, that all my questions were answered and that I was given the necessary time to make a decision.

I freely and willingly consent to participate in the **genetic sub-study** of this project:

I also accept that the remainder of my samples may be used for **additional genetic analyses** that may arise during the course of this study (future analysis):

YES       NO

|                                            |                          |      |
|--------------------------------------------|--------------------------|------|
| Name of participant name<br>(please print) | Signature of participant | Date |
|--------------------------------------------|--------------------------|------|

I have explained the genetic sub-study and this Consent Form to the participant, and I answered all his/her questions.

|                                                       |                                          |      |
|-------------------------------------------------------|------------------------------------------|------|
| Name of person<br>obtaining consent<br>(please print) | Signature of person<br>obtaining consent | Date |
|-------------------------------------------------------|------------------------------------------|------|



1  
2  
3 **CONSENT (GENETIC SUB-STUDY)**  
4 **FROM THE LEGAL REPRESENTATIVE (SUDDEN INCAPACITY)**  
5

6 Because Mr./Mrs. \_\_\_\_\_ has suddenly become incapable of giving  
7 consent for the hereinafter mentioned reason, the Civil Code of Québec allows you to  
8 give consent for him/her as his/her \_\_\_\_\_ (indicate your  
9 relationship with the participant) to participate in the **genetic sub-study** of the project.  
10

11 As soon as Mr./Mrs. \_\_\_\_\_ has sufficiently recovered, he/she will  
12 be asked to sign his/her own consent form to indicate whether he/she wants to continue  
13 taking part in this sub-study of the study.  
14  
15

16 REASON FOR THE PARTICIPANT NOT BEING ABLE TO GIVE CONSENT  
17  
18  
19

20  
21 By signing this page, I confirm that I have read the information in this Consent Form. I  
22 acknowledge that the **genetic sub-study** of the project has been explained to me, that  
23 all of my questions have been answered and that I was given enough time to make a  
24 decision.  
25

26 I voluntarily give my consent so that Mr./Mrs. \_\_\_\_\_ can participate in  
27 the genetic sub study.  
28  
29

30 I also agree that the remainder of the samples may be used for **additional genetic**  
31 **analyses** that may arise during the study (future analyses).  YES  NO  
32  
33  
34  
35

36 \_\_\_\_\_  
37 Name of legal representative      Signature of legal representative      Date  
38 *(please print)*

39  
40  
41 I have explained all relevant aspects of the genetic sub-study of this project to the  
42 participant's legal representative and I have answered all his/her questions.  
43  
44

45 \_\_\_\_\_  
46 Name of person      Signature of person      Date  
47 obtaining consent      obtaining consent  
48 *(please print)*  
49  
50  
51  
52  
53  
54  
55  
56  
57  
58  
59

1  
2  
3 **CONSENT (GENETIC SUB-STUDY)**  
4 **FROM LEGAL REPRESENTATIVE OR CAREGIVER (PERMANENT INCAPACITY)**  
5

6  
7 I confirm that I have read the information in this Consent Form. I acknowledge that the  
8 genetic sub-study of the project has been explained to me, that all of my questions have  
9 been answered and that I was given enough time to make a decision.  
10

11  
12 I agree that \_\_\_\_\_ can participate in this **genetic sub study** under the  
13 conditions stated therein. I will receive a signed and dated copy of this Information and  
14 Consent Form.  
15

16  
17 I also agree that the remainder of the samples may be used for **additional genetic**  
18 **analyses** that may arise during the study (future analyses).  YES  NO  
19

20  
21 If the participant is represented:  
22

23  
24  
25 \_\_\_\_\_  
26 Name and signature of the legal representative Date  
27 (representative, curator or mandatary)  
28

29  
30 If the incapacitated participant is not represented by a legal representative:  
31

32  
33  
34 \_\_\_\_\_  
35 Name and signature of the spouse, Date  
36 failing which, name of the next-of-kin or  
37 name of the significant person  
38

39  
40  
41 I have explained the research study and this Consent Form to the participant's legal  
42 representative. I have answered all his/her questions.  
43

44  
45  
46 \_\_\_\_\_  
47 Name of person Signature of person Date  
48 obtaining consent obtaining consent  
49 (please print)  
50

**PHONE CONSENT (GENETIC SUB-STUDY)**

(For the participant who is suddenly or permanently incapacitated)

Because Mr./Mrs. \_\_\_\_\_ is incapable of giving consent for the hereinafter mentioned reason.

REASON FOR THE PARTICIPANT NOT BEING ABLE TO GIVE CONSENT

---

I have explained the genetic sub study and this Consent Form to the legal representative using the phone script and I have answered all his/her questions.

The representative, Mr./Mrs. \_\_\_\_\_

Name of the legal representative (representative, curator or mandatary)

Name of the spouse or of the next-of-kin or

Name of the significant person

has given consent by phone on \_\_\_\_\_ at \_\_\_\_\_

Date

Time

The representative also agrees that the remainder of the samples may be used for **additional genetic analyses** that might arise during the study (future analyses).

**YES**  **NO**

---

Name of person  
obtaining consent  
(*please print*)

Signature of person  
obtaining consent

Date and time

# BMJ Open

## Optimal VAsopressor Titration in patients 65 years and older (OVATION-65) – protocol and statistical analysis plan for a randomized clinical trial

|                               |                                                                                                                                                                                                                                                                                                                                                                                                                                                                                                                                                                                                                                                                                                                                                                                                                                                                                                                                                                                                                                                                                                                                                                                                                                                                                                                                                                                                                                                                                                                                                                                                                                                                                                                                                                                                                                                                                                                                                                                                                                                                                                                                                                                                                                                                                                                                                                                                                                                                                                                                                                                        |
|-------------------------------|----------------------------------------------------------------------------------------------------------------------------------------------------------------------------------------------------------------------------------------------------------------------------------------------------------------------------------------------------------------------------------------------------------------------------------------------------------------------------------------------------------------------------------------------------------------------------------------------------------------------------------------------------------------------------------------------------------------------------------------------------------------------------------------------------------------------------------------------------------------------------------------------------------------------------------------------------------------------------------------------------------------------------------------------------------------------------------------------------------------------------------------------------------------------------------------------------------------------------------------------------------------------------------------------------------------------------------------------------------------------------------------------------------------------------------------------------------------------------------------------------------------------------------------------------------------------------------------------------------------------------------------------------------------------------------------------------------------------------------------------------------------------------------------------------------------------------------------------------------------------------------------------------------------------------------------------------------------------------------------------------------------------------------------------------------------------------------------------------------------------------------------------------------------------------------------------------------------------------------------------------------------------------------------------------------------------------------------------------------------------------------------------------------------------------------------------------------------------------------------------------------------------------------------------------------------------------------------|
| Journal:                      | <i>BMJ Open</i>                                                                                                                                                                                                                                                                                                                                                                                                                                                                                                                                                                                                                                                                                                                                                                                                                                                                                                                                                                                                                                                                                                                                                                                                                                                                                                                                                                                                                                                                                                                                                                                                                                                                                                                                                                                                                                                                                                                                                                                                                                                                                                                                                                                                                                                                                                                                                                                                                                                                                                                                                                        |
| Manuscript ID                 | bmjopen-2020-037947.R2                                                                                                                                                                                                                                                                                                                                                                                                                                                                                                                                                                                                                                                                                                                                                                                                                                                                                                                                                                                                                                                                                                                                                                                                                                                                                                                                                                                                                                                                                                                                                                                                                                                                                                                                                                                                                                                                                                                                                                                                                                                                                                                                                                                                                                                                                                                                                                                                                                                                                                                                                                 |
| Article Type:                 | Protocol                                                                                                                                                                                                                                                                                                                                                                                                                                                                                                                                                                                                                                                                                                                                                                                                                                                                                                                                                                                                                                                                                                                                                                                                                                                                                                                                                                                                                                                                                                                                                                                                                                                                                                                                                                                                                                                                                                                                                                                                                                                                                                                                                                                                                                                                                                                                                                                                                                                                                                                                                                               |
| Date Submitted by the Author: | 25-Jul-2020                                                                                                                                                                                                                                                                                                                                                                                                                                                                                                                                                                                                                                                                                                                                                                                                                                                                                                                                                                                                                                                                                                                                                                                                                                                                                                                                                                                                                                                                                                                                                                                                                                                                                                                                                                                                                                                                                                                                                                                                                                                                                                                                                                                                                                                                                                                                                                                                                                                                                                                                                                            |
| Complete List of Authors:     | <p>Masse, Marie-Hélène ; Centre intégré universitaire de santé et de services sociaux de l'Estrie Centre hospitalier universitaire de Sherbrooke du Québec, Centre de recherche</p> <p>Battista, Marie-Claude; Université de Sherbrooke, Médecine; Centre intégré universitaire de santé et de services sociaux de l'Estrie Centre hospitalier universitaire de Sherbrooke du Québec, Centre de recherche</p> <p>Wilcox, M. Elizabeth; University of Toronto, Interdepartmental Division of Critical Care Medicine; University Health Network, Médecine</p> <p>Pinto, Ruxandra; Sunnybrook Health Sciences Centre, Critical Care Medicine</p> <p>Marinoff, Nicole; Sunnybrook Health Sciences Centre, Critical Care Medicine</p> <p>D'Aragon, Frédéric; Université de Sherbrooke, Anesthesiology; Centre intégré universitaire de santé et de services sociaux de l'Estrie Centre hospitalier universitaire de Sherbrooke du Québec, Centre de Recherche</p> <p>St-Arnaud, Charles; Université de Sherbrooke, Médecine; Centre intégré universitaire de santé et de services sociaux de l'Estrie Centre hospitalier universitaire de Sherbrooke du Québec, Centre de Recherche</p> <p>Mayette, Michael; Université de Sherbrooke, Médecine; Centre intégré universitaire de santé et de services sociaux de l'Estrie Centre hospitalier universitaire de Sherbrooke du Québec, Centre de Recherche</p> <p>Leclair, Marc-André ; Université de Sherbrooke, Médecine</p> <p>Quiroz Martinez, Hector; Université de Sherbrooke, Médecine</p> <p>Grondin-Beaudoin, Brian; Université de Sherbrooke, Médecine</p> <p>Poulin, Yannick; Université de Sherbrooke, Médecine</p> <p>Carbonneau, Éline ; Centre intégré universitaire de santé et de services sociaux de l'Estrie Centre hospitalier universitaire de Sherbrooke du Québec, Centre de recherche</p> <p>Seely, Andrew; University of Ottawa, Departments of Surgery and Critical Care Medicine; Ottawa Hospital Research Institute</p> <p>Watpool, Irene; Ottawa Hospital Research Institute, Critical Care</p> <p>Porteous, Rebecca; Ottawa Hospital Research Institute, Critical Care</p> <p>Chassé, Michael; Université de Montréal, Médecine; Centre de Recherche du CHUM</p> <p>Lebrasseur, Martine; Centre de Recherche du CHUM, Critical Care</p> <p>Lauzier, François; Centre de recherche du CHUQ, Population Health and Optimal Health Practices Research Unit; Université Laval</p> <p>Turgeon, Alexis; Centre de recherche du CHUQ, Population Health and Optimal Health Practice Research Unit; Université Laval</p> |

|                                 |                                                                                                                                                                                                                                                                                                                                                                                                                                                                                                                                                                                                                                                                                                                                                                                                                                                                                                                                                                                                                                      |
|---------------------------------|--------------------------------------------------------------------------------------------------------------------------------------------------------------------------------------------------------------------------------------------------------------------------------------------------------------------------------------------------------------------------------------------------------------------------------------------------------------------------------------------------------------------------------------------------------------------------------------------------------------------------------------------------------------------------------------------------------------------------------------------------------------------------------------------------------------------------------------------------------------------------------------------------------------------------------------------------------------------------------------------------------------------------------------|
|                                 | Bellemare, David; Centre de recherche du CHUQ, Population Health and Optimal Health Practice Research Unit; Université Laval<br>Mehta, Sangeeta ; University of Toronto, Interdepartmental Division of Critical Care Medicine; Sinai Health System, Medicine<br>Charbonney, Emmanuel; Université de Montréal Faculté de médecine, Médecine<br>Belley-Cote, Emilie; McMaster University, Department of Medicine, Division of Cardiology; Population Health Research Institute<br>Botton, Édouard; no institutional affiliation<br>Cohen, Dian; no institutional affiliation<br>Lamontagne, François; Université de Sherbrooke, Médecine; Centre intégré universitaire de santé et de services sociaux de l'Estrie Centre hospitalier universitaire de Sherbrooke du Québec, Centre de recherche<br>Adhikari, Neill; University of Toronto, Interdepartmental Division of Critical Care Medicine and Institute for Health Policy, Management, and Evaluation ; Sunnybrook Health Sciences Centre, Department of Critical Care Medicine |
| <b>Primary Subject Heading</b>: | Intensive care                                                                                                                                                                                                                                                                                                                                                                                                                                                                                                                                                                                                                                                                                                                                                                                                                                                                                                                                                                                                                       |
| Secondary Subject Heading:      | Cardiovascular medicine, Pharmacology and therapeutics                                                                                                                                                                                                                                                                                                                                                                                                                                                                                                                                                                                                                                                                                                                                                                                                                                                                                                                                                                               |
| Keywords:                       | Adult intensive & critical care < ANAESTHETICS, Clinical trials < THERAPEUTICS, Clinical chemistry < PATHOLOGY                                                                                                                                                                                                                                                                                                                                                                                                                                                                                                                                                                                                                                                                                                                                                                                                                                                                                                                       |
|                                 |                                                                                                                                                                                                                                                                                                                                                                                                                                                                                                                                                                                                                                                                                                                                                                                                                                                                                                                                                                                                                                      |

SCHOLARONE™  
Manuscripts



I, the Submitting Author has the right to grant and does grant on behalf of all authors of the Work (as defined in the below author licence), an exclusive licence and/or a non-exclusive licence for contributions from authors who are: i) UK Crown employees; ii) where BMJ has agreed a CC-BY licence shall apply, and/or iii) in accordance with the terms applicable for US Federal Government officers or employees acting as part of their official duties; on a worldwide, perpetual, irrevocable, royalty-free basis to BMJ Publishing Group Ltd ("BMJ") its licensees and where the relevant Journal is co-owned by BMJ to the co-owners of the Journal, to publish the Work in this journal and any other BMJ products and to exploit all rights, as set out in our [licence](#).

The Submitting Author accepts and understands that any supply made under these terms is made by BMJ to the Submitting Author unless you are acting as an employee on behalf of your employer or a postgraduate student of an affiliated institution which is paying any applicable article publishing charge ("APC") for Open Access articles. Where the Submitting Author wishes to make the Work available on an Open Access basis (and intends to pay the relevant APC), the terms of reuse of such Open Access shall be governed by a Creative Commons licence – details of these licences and which [Creative Commons](#) licence will apply to this Work are set out in our licence referred to above.

Other than as permitted in any relevant BMJ Author's Self Archiving Policies, I confirm this Work has not been accepted for publication elsewhere, is not being considered for publication elsewhere and does not duplicate material already published. I confirm all authors consent to publication of this Work and authorise the granting of this licence.

1  
2  
3 Optimal VAsopressor TitraTION in patients 65 years and older (OVATION-65) – protocol  
4 and statistical analysis plan for a randomized clinical trial  
5

6 Marie-Hélène Masse, Marie-Claude Battista, M. Elizabeth Wilcox, Ruxandra Pinto, Nicole  
7 Marinoff, Frédérick D’Aragon, Charles St-Arnaud, Michael Mayette, Marc-André Leclair,  
8 Hector Quiroz Martinez, Brian Grondin-Beaudoin, Yannick Poulin, Éline Carbonneau,  
9 Andrew JE Seely, Irene Watpool, Rebecca Porteous, Michaël Chassé, Martine Lebrasseur,  
10 François Lauzier, Alexis Turgeon, David Bellemare, Sangeeta Mehta, Emmanuel  
11 Charbonney, Émilie Belley-Côté, Édouard Botton, Dian Cohen, François Lamontagne\*†,  
12 Neill KJ Adhikari\*†, on behalf of the Canadian Critical Care Trials Group  
13  
14

15  
16 Masse: Critical Care, Centre de recherche du Centre hospitalier universitaire de Sherbrooke,  
17 Sherbrooke, QC, Canada (marie-helene.masse3@usherbrooke.ca)

18 Battista: Department of Medicine, Université de Sherbrooke, and Centre de recherche du Centre  
19 hospitalier universitaire de Sherbrooke, Sherbrooke, QC, Canada (marie-  
20 claudette.battista@usherbrooke.ca)

21 Wilcox: Interdepartmental Division of Critical Care Medicine, University of Toronto, and Department  
22 of Medicine, University Health Network, Toronto, ON, Canada (elizabeth.wilcox@utoronto.ca)

23 Pinto: Department of Critical Care Medicine, Sunnybrook Health Sciences Centre, Toronto, ON,  
24 Canada (ruxandra.pinto@sunnybrook.ca)

25 Marinoff: Department of Critical Care Medicine, Sunnybrook Health Sciences Centre, Toronto, ON,  
26 Canada (nicole.marinoff@sunnybrook.ca)

27 D’Aragon: Department of Anesthesiology, Université de Sherbrooke, and Centre de recherche du  
28 Centre hospitalier universitaire de Sherbrooke, Sherbrooke, QC, Canada  
29 (frederick.daragon@usherbrooke.ca)

30 St-Arnaud: Université de Sherbrooke, Department of Medicine, and Centre de recherche du Centre  
31 hospitalier universitaire de Sherbrooke, Sherbrooke, QC, Canada (Charles.St-  
32 Arnaud@USherbrooke.ca)

33 Mayette: Department of Medicine, Université de Sherbrooke, and Centre de recherche du Centre  
34 hospitalier universitaire de Sherbrooke, Sherbrooke, QC, Canada (michael.mayette@usherbrooke.ca)

35 Leclair: Department of Medicine, Université de Sherbrooke, Sherbrooke, QC, Canada (Marc-  
36 Andre.Leclair@USherbrooke.ca)

37 Quiroz Martinez: Department of Medicine, Université de Sherbrooke, Sherbrooke, QC, Canada  
38 (Hector.Quiroz.Martinez@USherbrooke.ca)

39 Grondin-Beaudoin: Department of Medicine, Université de Sherbrooke, Sherbrooke, QC, Canada  
40 (Brian.Grondin.Beaudoin@USherbrooke.ca)

41 Poulin: Department of Medicine, Université de Sherbrooke, Sherbrooke, QC, Canada  
42 (yannick.poulin@usherbrooke.ca)

43 Carbonneau: Critical Care, Centre de recherche du Centre hospitalier universitaire de Sherbrooke,  
44 Sherbrooke, QC, Canada (elaine.carbonneau.ciussse-chus@ssss.gouv.qc.ca)

45 Seely: Departments of Surgery and Critical Care Medicine, University of Ottawa, and Ottawa Hospital  
46 Research Institute, Ottawa, ON, Canada (aseely@toh.ca)

47 Watpool: Critical Care, Ottawa Hospital Research Institute, Ottawa, ON, Canada (iwatpool@toh.ca)

48 Porteous: Critical Care, Ottawa Hospital Research Institute, Ottawa, ON, Canada (rporteous@ohri.ca)

49 Chassé: Department of Medicine, Université de Montréal, and Centre de Recherche du Centre  
50 Hospitalier de l’Université de Montréal, Montréal, QC, Canada (michael.chasse@umontreal.ca)

51 Lebrasseur: Critical Care, Centre de Recherche du Centre Hospitalier Universitaire de Montréal,  
52 Montréal, QC, Canada (martine.lebrasseur.chum@ssss.gouv.qc.ca)

53 Lauzier: Population Health and Optimal Health Practice Research Unit, Centre de recherche du CHU  
54 de Québec-Université Laval, Québec, QC, Canada (francois.lauzier@fmed.ulaval.ca)

55 Turgeon: Population Health and Optimal Health Practice Research Unit, Centre de recherche du CHU  
56 de Québec-Université Laval, Québec, QC, Canada (alexis.turgeon@fmed.ulaval.ca)  
57  
58  
59  
60

1  
2  
3 Bellemare: Population Health and Optimal Health Practice Research Unit, Centre de recherche du  
4 CHU de Québec-Université Laval, Québec, QC, Canada (david.bellemare@crchudequebec.ulaval.ca)

5 Mehta: Interdepartmental Division of Critical Care Medicine, University of Toronto, and Department  
6 of Medicine, Sinai Health System, Toronto, ON, Canada (geeta.mehta@sinaihealth.ca)

7 Charbonney: Department of Medicine, Université de Montréal, and Centre de Recherche du Centre  
8 Hospitalier Universitaire de Montréal, Montréal, QC, Canada (emmanuel.charbonney@umontreal.ca)

9 Belley-Côté: Department of Medicine, Division of Cardiology, McMaster University, and Population  
10 Health Research Institute, Hamilton, ON, Canada (emilie.belley-cote@phri.ca)

11 Botton: no institutional affiliation, Sherbrooke, QC, Canada (edbotton@hotmail.com)

12 Cohen: no institutional affiliation, Sherbrooke, QC, Canada (hey.dian@gmail.com)

13 Lamontagne: Department of Medicine, Université de Sherbrooke, and Centre de recherche du Centre  
14 hospitalier universitaire de Sherbrooke, Sherbrooke, QC, Canada

15 (francois.lamontagne@usherbrooke.ca)

16 Adhikari: Interdepartmental Division of Critical Care Medicine and Institute for Health Policy,  
17 Management, and Evaluation, University of Toronto, and Department of Critical Care Medicine,  
18 Sunnybrook Health Sciences Centre, Toronto, ON, Canada (neill.adhikari@utoronto.ca)

19  
20  
21 \* correspondence: neill.adhikari@utoronto.ca; francois.lamontagne@usherbrooke.ca

22 † contributed equally and co-senior authors  
23  
24  
25  
26  
27  
28  
29  
30  
31  
32  
33  
34  
35  
36  
37  
38  
39  
40  
41  
42  
43  
44  
45  
46  
47  
48  
49  
50  
51  
52  
53  
54  
55  
56  
57  
58  
59  
60



**Abstract**

**Introduction:** Vasodilatory hypotension is common among intensive care unit (ICU) patients; vasopressors are considered standard of care. However, optimal mean arterial pressure [MAP] targets for vasopressor titration are unknown. The objective of OVATION-65 (Optimal VAsopressor TitraTION-65) is to ascertain the effect of permissive hypotension (vasopressor titration to achieve MAP 60-65 mmHg) vs. usual care on biomarkers of organ injury in hypotensive patients  $\geq 65$  years old.

**Methods and analysis:** OVATION-65 is an allocation-concealed randomized trial in 7 Canadian hospitals. Eligible patients are  $\geq 65$  years old, in an ICU with vasodilatory hypotension, receiving vasopressors for  $\leq 12$  hours to maintain MAP  $\geq 65$  mmHg during or after adequate fluid resuscitation, and expected to receive vasopressors for  $\geq 6$  additional hours. Patients are excluded for any of the following: active treatment for spinal cord or acute brain injury; vasopressors given solely for bleeding, ventricular failure or post-cardiopulmonary bypass vasoplegia; withdrawal of life-sustaining treatments expected within 48 hours; death perceived as imminent; previous enrolment in OVATION-65; organ transplant within the last year; receiving extracorporeal life support; or lack of physician equipoise. Patients are randomized to permissive hypotension vs. usual care for up to 28 days. The primary outcome is high-sensitivity troponin T, a biomarker of cardiac injury, on day 3. Secondary outcomes include biomarkers of injury to other organs (brain, liver, intestine, skeletal muscle); lactate (a biomarker of global tissue dysoxia); resource utilization; adverse events; mortality (90 days and 6 months); and cognitive function (6 months). Assessors of biomarkers, mortality, and cognitive function are blinded to allocation.

**Ethics and dissemination:** This protocol has been approved at all sites. Consent is obtained from the eligible patient, the substitute decision-maker if the patient is incapable, or in a

1  
2  
3 deferred fashion where permitted. End-of-grant dissemination plans include presentations,  
4  
5 publications, and social media platforms and discussion forums.  
6

7 **Trial registration:** [clinicaltrials.gov](http://clinicaltrials.gov), NCT03431181  
8  
9

10  
11  
12 **Keywords**  
13

14 vasopressors; shock; critical care; biomarkers; randomized controlled trial  
15  
16  
17  
18  
19  
20  
21  
22  
23  
24  
25  
26  
27  
28  
29  
30  
31  
32  
33  
34  
35  
36  
37  
38  
39  
40  
41  
42  
43  
44  
45  
46  
47  
48  
49  
50  
51  
52  
53  
54  
55  
56  
57  
58  
59  
60

## Article summary

### Strengths and limitations of this study

- OVATION-65 is an allocation-concealed randomized clinical trial of permissive hypotension vs. usual care in patients 65 years and older with hypotension from a vasodilatory cause, a population that may be more vulnerable to adverse effects of vasopressors
- Vasopressor titration is understudied in critically ill patients, compared to other interventions such as mechanical ventilation
- The primary and many secondary outcomes, selected with input from a patient representative, focus on biomarkers of organ injury; although these are not patient-centred outcomes, results will complement clinical outcome data from larger trials
- Because of the nature of the intervention, clinician blinding is not feasible; however, outcome assessors are blinded
- The modest sample size implies that the trial is underpowered for clinical outcomes

## Introduction

Shock, a clinical syndrome of which hypotension is a cardinal feature, is common and associated with high mortality. Vasopressors are used to treat hypotension that is potentially life-threatening because they raise blood pressure by inducing vasoconstriction.<sup>1</sup> However, these medications are associated with adverse effects,<sup>2-4</sup> some of which are direct consequences of vasoconstriction-induced reduction in blood flow to vital organs. Therefore, titrating vasopressors implies balancing the risks of end-organ failure caused by hypotension and potential vasopressor-induced harm, including myocardial injury and arrhythmia, excessive vasoconstriction, hyperglycemia, and immunosuppression.<sup>2-5</sup> Permissive hypotension is a strategy of targeting a lower blood pressure when prescribing vasopressors, compared to usual care. Benefits have been associated with other 'permissive' therapies in critically ill patients, including hypoxia,<sup>6</sup> underfeeding,<sup>7</sup> hypercapnia,<sup>8</sup> red blood cell transfusion,<sup>9</sup> and hypotension in thoracic penetrating trauma.<sup>10</sup>

Clinicians in the intensive care unit (ICU) use mean arterial pressure (MAP) targets to determine the intensity of vasopressor therapy. Current international practice guidelines recommend titrating vasopressors to a MAP of 65 mmHg,<sup>11</sup> but because the target lacks an upper boundary, clinicians commonly put more emphasis on preventing hypotension than on minimizing vasopressor exposure. This under-appreciation of the risks associated with vasopressor overuse was apparent in a multicentre observational study<sup>12</sup> that reported an average MAP of 75 (standard deviation [SD] 6) mmHg in patients receiving vasopressors, approximately 10 mmHg above the recommended MAP and self-reported practice.<sup>13</sup> Given the relative lack of studies about vasopressor dosing, in contrast to other common ICU treatments such as mechanical ventilation, editorialists have advocated for better characterization of the lowest acceptable blood pressure target to avoid vasopressor-induced harm.<sup>3</sup>

### *Existing evidence*

Observational studies have described independent associations between dose and duration of vasopressor therapy and poor outcomes, such as adverse cardiac events and increased mortality.<sup>14 15</sup> However, these studies are limited by indication bias, as patients who are sicker have a greater risk of unfavourable outcomes and are therefore more likely to be exposed to higher doses of vasopressor therapy.

Two randomized clinical trials (RCTs; combined n=894) published prior to the initiation of this study compared blood pressure targets in patients receiving vasopressors.<sup>16 17</sup> The SEPSISPAM trial compared a MAP target of 65-70 mmHg vs. 80-85 mmHg for 5 days in 776 patients with septic shock from 29 French ICUs. This study reported no difference in 28-day mortality (lower MAP 34.0% vs. higher MAP 36.6%, p=0.57), but a greater risk of atrial fibrillation in the higher MAP arm (6.7% versus 2.8%, p=0.02).<sup>16</sup> However, actual MAP values were 74-76 mmHg in the lower MAP arm, precluding conclusions regarding permissive hypotension. The OVATION pilot feasibility trial randomly assigned 118 patients from 1 US and 10 Canadian ICUs to a lower (60-65 mmHg) or higher (75-80 mmHg) MAP target<sup>17</sup>. This trial was not powered to detect differences in mortality. A subsequent individual patient data meta-analysis (IPDMA)<sup>18</sup> included data from both RCTs and found that higher MAP targets (75-85 mmHg) may be associated with an increased risk of 28-day mortality in older patients (p=0.1 for interaction between age and MAP).

Based on these RCTs, guidelines state that no evidence supports the use of vasopressors to achieve MAP values >65 mmHg for patients receiving vasopressors.<sup>19</sup> Subsequently, the 65 trial randomized 2600 patients ≥65 years old in the United Kingdom to permissive hypotension vs. usual care using a similar protocol as OVATION-65.<sup>20 21</sup> Patients in the permissive hypotension arm had a lower exposure to vasopressors and a lower 90-day

1  
2  
3 mortality (41.0% vs. 43.8%,  $p=0.15$ ), but the difference was not statistically significant.

4  
5 However, an analysis adjusting for baseline covariates found lower mortality with permissive  
6 hypotension (OR 0.82, 95%CI 0.68-0.98).<sup>22</sup> The 65 trial collected no biological samples,  
7 precluding exploration of mechanisms underlying the effect of vasopressor dosing in that  
8 trial.  
9  
10  
11  
12  
13  
14  
15  
16

### 17 *Objective and Specific Aims*

18  
19 The main objective of OVATION-65 is to determine whether permissive hypotension  
20 (MAP 60-65 mmHg) in patients  $\geq 65$  years old with a vasodilatory cause of hypotension and  
21 receiving vasopressors, compared to usual MAP targets, reduces organ injury as measured by  
22 biomarkers. Specific aims are to ascertain the effect of permissive hypotension vs. usual care  
23 on: 1) biomarkers of organ injury (heart [primary outcome], brain, liver, intestine, skeletal  
24 muscle); 2) biomarker of global tissue dysoxia (lactate); 3) organ function (assessed by  
25 Sequential Organ Failure Assessment [SOFA] score<sup>23</sup>); 4) resource utilization, 5) prespecified  
26 adverse events, 6) mortality at 90 days and 6 months; 7) cognitive impairment in survivors at  
27 6 months (Table 1).  
28  
29  
30  
31  
32  
33  
34  
35  
36  
37  
38  
39

40 The primary outcome and several secondary outcomes are focused on biomarkers  
41 because of well-documented limitations of mortality in critical care trials<sup>24</sup> and the challenges  
42 of developing valid surrogate endpoints.<sup>25</sup> OVATION-65 was designed to be complementary  
43 to the 65 trial.<sup>22</sup> A larger version of OVATION-65 ( $n=800$ ) was abandoned in 2018 after  
44 funding applications to the Canadian Institutes for Health Research and the Canadian Frailty  
45 Network were rejected. As discussed in the *Statistical Analysis* section, the Data and Safety  
46 Monitoring Committee (DSMC) recommended termination of enrollment in the current  
47 smaller version of OVATION-65 on 21 February 2020; patient follow-up is ongoing.  
48  
49  
50  
51  
52  
53  
54  
55  
56  
57  
58  
59  
60

## Methods and analysis

OVATION-65 is a multicentre, parallel-group, allocation-concealed, superiority RCT. We developed OVATION-65 on behalf of the Canadian Critical Care Trials Group (CCCTG), a 350-member organization of clinicians and researchers, incorporating feedback received since January 2012 at each of its thrice yearly scientific meetings. Table 2 shows a timeline of trial activities. The SPIRIT checklist is available in online supplementary file S1.

### *Study setting and management*

Many study procedures for OVATION-65 are the same as those described for another trial conducted by our group.<sup>26</sup> OVATION-65 is conducted in adult ICUs in 7 sites in Canada. OVATION-65 team members, including research personnel at clinical sites active at the time of submission of this manuscript, are listed in online supplementary file S2. The procedures in place for OVATION-65 were piloted during the OVATION pilot RCT.<sup>17</sup> The Unité de Recherche Clinique et Épidémiologique (URCE) is coordinating this trial and is responsible for construction and maintenance of the randomization system and the REDCap<sup>27 28</sup> electronic data capture (EDC) system. The URCE also oversees the storage and analysis of blood and urine samples in the OVATION-65 core laboratory.

### *Inclusion criteria*

Patients are included if they meet all the following criteria: 1) age  $\geq 65$  years; 2) diagnosis of vasodilatory hypotension as assessed by the treating team; 3) vasopressors started  $\leq 12$  hours ago (after or during adequate fluid resuscitation, as assessed by treating physician); and 4) vasopressors expected for  $\geq 6$  additional hours, as assessed by the treating team. Aligned with the 65 trial,<sup>22</sup> we do not specify a minimum volume of fluid or specific

1  
2  
3 examinations for volume status prior to the clinical (pre-randomization) decision to  
4  
5 commence a vasopressor.  
6  
7  
8  
9

### 10 *Exclusion criteria*

11  
12 Patients are excluded if they meet any of the following criteria: 1) actively treated for  
13  
14 spinal cord injury or acute brain injury; 2) vasopressors given solely for bleeding, acute  
15  
16 ventricular failure or post-cardiopulmonary bypass vasoplegia; 3) lacking commitment to life-  
17  
18 sustaining therapies (expected withdrawal of life-sustaining treatments within the next 48  
19  
20 hours); 4) death perceived as imminent; 5) previously enrolled in OVATION-65; 6) organ  
21  
22 transplant within the last year; 7) receiving extracorporeal life support at baseline; and 8) lack  
23  
24 of treating physician equipoise regarding the overall effects of permissive hypotension vs.  
25  
26 usual care on patient important outcomes.  
27  
28  
29  
30  
31  
32

### 33 *Rationale for eligibility criteria*

34  
35 The inclusion criteria strive to identify patients most likely to benefit from permissive  
36  
37 hypotension, namely elderly patients not already exposed to a prolonged duration of higher  
38  
39 MAP but expected to require an additional period of vasopressor therapy. The exclusion  
40  
41 criteria are designed to exclude patients for whom clinicians commonly apply different MAP  
42  
43 targets (criterion 1) or whose prognosis may be dominated by factors other than the MAP  
44  
45 target (criteria 2, 3, 4, 6, 7).  
46  
47  
48  
49  
50

### 51 *Study intervention*

#### 52 Treatment allocation

53  
54  
55  
56 Using a web randomization service available 24 hours/7 days per week, patients are  
57  
58 randomized immediately after confirming eligibility following a 1:1 sequence to permissive  
59  
60



1  
2  
3 hypotension or usual care. We use permuted blocks of variable and undisclosed size (4, 6 and  
4  
5 8) and stratify randomization by site. Stratifying by site ensures equal distribution of patients  
6  
7 between arms at each site and decreases the probability that site-specific practices confound  
8  
9 treatment effects.  
10  
11  
12  
13

#### 14 Permissive hypotension arm

15  
16  
17 The intervention minimizes dose and duration of vasopressors. Treating teams adjust  
18  
19 vasopressors to a target MAP range of 60 to 65 mmHg. A MAP of 60 mmHg was selected as  
20  
21 lowest tolerable limit because it corresponds to the threshold at which Canadian intensivists  
22  
23 usually initiate vasopressors.<sup>13</sup> Accordingly, it is not uncommon for patients to have MAP as  
24  
25 low as 60 mmHg before vasopressors are instituted under usual care. The same MAP range  
26  
27 was used in the OVATION pilot RCT.<sup>17</sup>  
28  
29

30  
31 The duration of the trial intervention is determined, as it was in the pilot RCT, by the  
32  
33 duration of the hypotensive episode, up to a maximum of 28 days. For trial purposes, the  
34  
35 episode of hypotension ends when vasopressors are discontinued for 24 consecutive hours. As  
36  
37 soon as patients are able to maintain the target MAP without vasopressors, the infusions are  
38  
39 stopped. If MAP drops below 60 mmHg after this 24-hour period, and if the treating team  
40  
41 determines that vasopressors should be reinstated, they are titrated to the allocated target of  
42  
43 60 to 65 mmHg. If patients are discharged and then readmitted to the ICU, vasopressor  
44  
45 therapy is left at the discretion of the treating team. We do not mandate resumption of the  
46  
47 permissive hypotension strategy to enhance trial feasibility, and we anticipate relatively few  
48  
49 readmissions overall and rare readmissions before ascertainment of our primary outcome on  
50  
51 day 3.  
52  
53  
54  
55  
56  
57

#### 58 Usual care arm

1  
2  
3 Patients in the control arm receive usual care, as per local practice. This constitutes an  
4 improvement to the protocol of the OVATION pilot trial, which imposed a higher target MAP  
5 range of 75 to 80 mmHg. Given preliminary evidence suggesting that this higher MAP target  
6 may increase risk of death in older patients, we believe that mandating a higher MAP would  
7 be ethically questionable. By comparing permissive hypotension to usual care, we improve  
8 acceptance from clinicians and reduce the risk that the control group will diverge widely from  
9 usual care.<sup>29</sup> Risks of contamination are negligible given observational data showing that  
10 MAP values of patients treated with vasopressors are much higher than the currently  
11 recommended target of 65 mmHg. Moreover, changing the behaviour of physicians and  
12 nurses is challenging even when there is consensus on the benefit of a new intervention,<sup>30</sup> and  
13 such a consensus does not exist for permissive hypotension.<sup>31</sup> To further decrease the risk of  
14 contamination (i.e. lack of separation of MAP between arms), we monitor separation of actual  
15 MAP between study arms and communicate regularly with sites.

### 32 33 34 35 Selection of vasopressors

36  
37 We do not mandate the use of any specific vasopressor or combination of vasopressors.  
38 In OVATION-65, the term 'vasopressor' refers to the following medications given by  
39 infusion: norepinephrine, epinephrine, dopamine, phenylephrine, and vasopressin. In patients  
40 receiving multiple vasopressors, we calculate the total vasopressor dose as norepinephrine  
41 equivalent as previously reported.<sup>32</sup> In addition, we collect information on orally  
42 administered catecholaminergic medications (i.e., midodrine and ephedrine).

### 43 44 45 46 47 48 49 50 51 52 53 Other interventions

54  
55 As per usual care of patients receiving vasopressors, we expect central venous  
56 catheters (to avoid extravasation) and arterial catheters (for close MAP monitoring) to be in  
57  
58  
59  
60

1  
2  
3 place for most patients. MAP is measured by an arterial line if present or by a non-invasive  
4  
5 blood pressure cuff otherwise; values are taken from the nursing vital signs flowsheet.

6  
7 Peripheral venous lines to deliver vasopressors or non-invasive blood pressure measurements  
8  
9 do not constitute protocol deviations, consistent with a pragmatic study design. Use of pure  
10  
11 inotropes, intravenous fluids, and corticosteroids are recorded but left to the discretion of the  
12  
13  
14  
15 treating team.

## 16 17 18 19 *Outcomes*

### 20 21 Primary outcome

22  
23 The primary outcome of OVATION-65 is plasma high-sensitivity cardiac troponin T  
24  
25 (hsTnT) at day 3, or before anticipated death or withdrawal of life-sustaining therapies,  
26  
27 whichever comes first. A baseline sample (day 1) is collected before assignment to the  
28  
29 intervention but after vasopressors have started. Cardiac troponins are consistently associated  
30  
31 with worse outcomes in critical illness<sup>33-37</sup>, and cardiac biomarkers may be modifiable by  
32  
33 administration of albumin<sup>34</sup> and medications.<sup>35</sup> Given that coronary blood flow is maintained  
34  
35 over a broad range of coronary perfusion pressures under most circumstances,<sup>38</sup> we  
36  
37 hypothesize that increasing vasopressors to achieve a higher MAP will have little effect on  
38  
39 coronary perfusion but may increase the severity of demand-related myocardial ischemia via  
40  
41 increased heart rate (i.e. reduced coronary perfusion time) and transmural pressure (i.e.  
42  
43 afterload). If OVATION-65 shows that permissive hypotension prevents or limits hsTnT  
44  
45 elevation, then patients at increased risk of secondary myocardial ischemia, possibly  
46  
47 identified by baseline hsTnT, may benefit the most from this strategy. Similarly, this  
48  
49 biomarker could be used to identify vasopressor-induced harm earlier and modify vasopressor  
50  
51 use accordingly.  
52  
53  
54  
55  
56  
57  
58  
59  
60

## Secondary outcomes

Secondary outcomes include high-sensitivity cardiac troponin T (hs TnT) at day 7; biomarkers associated with cardiac wall stress (N-terminal pro-B-type natriuretic peptide [NT-proBNP]<sup>34</sup>); tissue injury to the brain<sup>39</sup> (glial fibrillary acidic protein [GFAP]<sup>40</sup>, myelin basic protein [MBP]<sup>41</sup>, neuron-specific enolase [NSE]<sup>42</sup>), liver (alanine aminotransferase [ALT]<sup>43</sup>), intestine (intestinal-type fatty acid binding protein [FABP]<sup>44</sup>), and skeletal muscle (creatinine kinase [CK]<sup>45</sup>); and global tissue dysoxia (lactate). As for hsTnT, these biomarker outcomes are measured at day 3 and 7, along with a baseline sample; all biomarkers are measured in plasma, except for NSE, which is measured in serum. We selected lactate as a reasonable measure of tissue hypoxia in critically ill patients but recognize that hyperlactatemia may result from other factors, including aerobic glycolysis, reduced oxidative phosphorylation, and decreased clearance.<sup>46</sup>

We measure secondary clinical outcomes, including organ function using SOFA score (measured on days 2, 3, 4, 7, 10, 14 and 28 while in the ICU, along with a baseline [day 1] measurement). We describe healthcare utilization in terms of days of mechanical ventilation, renal replacement therapy, vasopressor therapy, and ICU and hospital stay. We report the incidence of the pre-specified adverse events of stroke, acute kidney injury (KDIGO stage 3),<sup>47</sup> clinically detected supraventricular arrhythmia,<sup>5 48</sup> and limb or intestinal ischemia as defined in the OVATION pilot trial.<sup>17</sup> Investigators will adjudicate these adverse events using medical records, if necessary. We ascertain mortality at 90 days and 6 months. For 6-month survivors, we assess cognition using the Telephone Interview for Cognitive Status (TICS), a validated questionnaire used in ICU cohorts.<sup>49</sup>

We had originally planned to measure additional secondary outcomes but lacked resources to do so for each participant. We have described these additional secondary outcomes as planned ancillary studies in online supplementary file S3.

### *Adverse events*

OVATION-65 is testing a common intervention to treat a common problem in critically ill patients. All eligible patients are at risk of adverse events due to their underlying critical illness. Following Canadian guidelines for serious adverse event (SAE) reporting in academic drug trials in critical care,<sup>50</sup> expected SAEs (stroke, KDIGO stage 3 acute kidney injury, clinically detected supraventricular arrhythmia, limb or intestinal ischemia, death) are already incorporated as trial outcomes, defined *a priori*. SAEs are limited to events not already labelled as trial outcomes and that might reasonably occur as a consequence of the trial interventions. SAEs must be reported in the participant's medical notes, on the OVATION-65 dedicated case report form and to the coordinating centre within 24 hours of observing or learning of the event. Such events are promptly discussed with the DSMC.

### Data collection

We collect the following data: 1) baseline data (day 1) – demographics, admitting diagnosis, etiology of hypotension, severity of illness (APACHE II score<sup>51</sup>), vasopressor name, dose and start time, organ dysfunction (SOFA score<sup>23</sup>), comorbidities (including chronic hypertension, coronary, cerebral, or peripheral vascular disease, congestive heart failure, chronic kidney disease, severe cognitive impairment, Clinical Frailty Scale,<sup>52</sup> co-enrolment in other prospective observational studies or RCTs; 2) daily data – protocol adherence (hourly MAP while receiving vasopressors and corresponding vasopressor names, doses, and modifications) and relevant co-interventions (fluid balance, inotropes, corticosteroids, life-support interventions, sedation); and 3) primary and secondary outcomes. We collect data on the times from hospital admission and ICU admission to the start of vasopressors. We collect data on fluid balance (total intake – total output) on the day of

1  
2  
3 randomisation, but we do not collect data on volume of intravenous fluid administered before  
4  
5 initiation of vasopressors.  
6  
7  
8  
9

### 10 Study Samples

11  
12 To minimize the treating teams' workload, study samples (blood and urine) coincide as  
13  
14 much as possible with clinical sampling on day 1 (baseline) and on day 3 and 7 (or the day of  
15  
16 ICU discharge or before anticipated death or withdrawal of life-sustaining therapies,  
17  
18 whichever comes first).  
19  
20

21 To ensure consistent measurement of biomarkers, the study samples are processed on  
22  
23 site and shipped to URCE, where they are stored at -80°C and batched for analyses at the end  
24  
25 of the trial. Clinicians are blinded to the results of study biomarker assays but can order any  
26  
27 laboratory tests available at their hospital. Participants are also approached for participation in  
28  
29 a parallel Acute Care Biobank, via a separate consent form, which allows samples remaining  
30  
31 following completion of OVATION-65 specified analyses to be stored for future projects.  
32  
33  
34  
35  
36  
37

### 38 Risk of bias

39  
40 Randomization is concealed, with variable and undisclosed block size, thereby  
41  
42 reducing risk of bias. Although clinical teams are not blinded to treatment arms, assessors of  
43  
44 biomarkers, pre-specified adverse events, mortality, and TICS are blinded to treatment  
45  
46 allocation. Specimen processing and analysis are standardized as described. Finally, we  
47  
48 record co-interventions to detect performance bias.  
49  
50

51 A risk of bias related to the biomarker outcomes is that early death or live discharge  
52  
53 from the ICU, which may be related to treatment allocation, are competing risks for ongoing  
54  
55 treatment in the ICU and ascertainment of these outcomes. Our analysis plan (see *Statistical*  
56  
57 *analysis* below) accounts for this possibility.  
58  
59  
60

### Vasopressor management and protocol adherence

In the permissive hypotension arm, a protocol deviation is defined as a failure to reduce the dose of (or discontinue) vasopressors while the MAP is  $>65$  mm Hg for three consecutive hours. Sites report protocol deviations on study forms and are asked to specify a reason for the deviation, which may include a physician's decision to target a higher MAP because of particular clinical circumstances. Investigators will adjudicate protocol deviations using source data.

For each day on protocol, we record the MAP value recorded nearest to each hour. In the permissive hypotension arm, clinical teams are reminded to consider discontinuing vasopressor therapy if the patients are able to maintain MAP values of at least 60 mmHg. Every participating site receives on-site training, to which all ICU bedside staff are invited. We distribute standard operating procedures and protocol adherence reports generated from MAP and vasopressor data entered in the electronic case report form. Regular newsletters and trial website updates (<https://www.ccctg.ca/Programs/OVATION65.aspx>) keep participating sites informed of study progress, overall adherence, and answers to frequently asked questions. Research staff are available 24/7.

We will report vasopressor management in each arm in terms of duration and total dose of vasopressor therapy received, hourly MAP values and corresponding vasopressor infusion rates, and the number of episodes of vasopressor therapy. In the permissive hypotension arm, we will report the number and proportion of patients with any protocol deviation. As in the 65 trial,<sup>22</sup> patient-level adherence will be defined as not having experienced a protocol deviation. We will also report total time on vasopressors with recorded MAP within target range; total time on vasopressors with recorded MAP above target range; total time on vasopressors with recorded MAP  $>5$  mmHg above upper limit of target; and

1  
2  
3 total time on vasopressors with recorded MAP below target range. These measures will be  
4  
5 summarized with descriptive statistics.  
6  
7  
8  
9

### 10 Follow-up

11  
12 Participants are followed to hospital discharge by local research teams. Either the  
13  
14 coordinating centre or the enrolling site ascertains 90-day and 6-month mortality and 6-month  
15  
16 cognitive status in survivors by telephone. Prior verification of known vital status with local  
17  
18 research teams and calibrated telephone scripts mitigate the risk of emotional distress in the  
19  
20 event that a patient has died since hospital discharge. We selected TICS to measure cognitive  
21  
22 function in survivors because telephone administration reduces risk of bias, improves  
23  
24 measurement consistency, reduces patient burden, and enhances feasibility.  
25  
26  
27  
28  
29

### 30 Patient and public involvement

31  
32 The protocol was developed with input from 2 ICU survivors (EB and DC), who  
33  
34 participated in protocol development meetings, contributed to the selection of 6-month  
35  
36 cognitive function as a secondary outcome, and are co-authors of this manuscript.  
37  
38  
39  
40  
41

### 42 *Statistical analysis*

#### 43 Sample size

44  
45 OVATION-65 is supported by several modest operating grants, each of which required a  
46  
47 distinct objective, sample size calculation and analysis plan. By combining funds from  
48  
49 multiple sources, we had planned to enrol 200 participants, which provides 80% power to  
50  
51 detect an effect size of 0.4 in the difference between day 3 hsTnT in the permissive  
52  
53 hypotension group compared to usual care, where 0.5 is considered to be medium.<sup>53</sup>  
54  
55  
56  
57  
58  
59  
60



1  
2  
3 After the 65 trial<sup>22</sup> was published, the OVATION-65 Executive Committee forwarded the  
4 publication to the DSMC, which requested a meeting to discuss the results. The DSMC  
5 subsequently issued a letter on 21 February 2020 recommending termination of enrolment in  
6 OVATION-65. The DSMC “reasoned that in light of the accumulated evidence, mostly from  
7 the 65 trial<sup>22</sup> but also with some consideration of SEPSISPAM,<sup>16</sup> the posterior probability of  
8 lower MAP targets now being better was sufficiently high that there is no longer equipoise  
9 between the interventions being compared in OVATION-65.” As of 21 February 2020, 159  
10 patients had been randomized.  
11  
12  
13  
14  
15  
16  
17  
18  
19  
20  
21  
22  
23

#### 24 Patient flow

25  
26 A sample CONSORT diagram is presented in Figure 1.  
27  
28  
29

#### 30 Data analysis

31  
32 Analyses will be performed after all follow-up is completed, data queries are resolved,  
33 and the database is locked. Analyses will follow the intention-to-treat principle, with data  
34 from participants analyzed by allocated group. All participant data will be analysed unless  
35 consent to retain data is withdrawn. Statistical testing will use a superiority framework, with  
36 two-sided  $p < 0.05$  interpreted as statistically significant. Estimates of effect will be reported  
37 with 95% confidence intervals. No adjustments for multiplicity will be made. All analyses  
38 will use SAS 9.4 (Cary, USA). Given the modest sample size and focus on biomarkers of  
39 organ injury, no interim analysis was planned. Continuous data will be summarised as means  
40 (SD) if normally distributed and as medians (Q1, Q3) otherwise. Categorical data will be  
41 summarised as frequencies and proportions. Baseline data will be summarised as shown in  
42  
43  
44  
45  
46  
47  
48  
49  
50  
51  
52  
53  
54  
55  
56 Table 3.  
57  
58  
59  
60

1  
2  
3 The primary outcome of day 3 hsTnT will be analysed adjusting for the day 1 value. We  
4 will use the original scale and analysis of covariance if the data are not skewed; if skewed we  
5 will log-transform and use robust regression to obtain more interpretable estimates. We will  
6 use pooled logistic regression to estimate the probabilities of missing values due to either  
7 death or live discharge from the ICU. Based on these models, we will compute the inverse-  
8 probability of attrition weights for each observation and use generalized estimating equation  
9 models to test the differences in hs TnT between the permissive hypotension and usual care  
10 arm,<sup>54</sup> adjusting for centre using fixed effects. As a sensitivity analysis, for patients that die  
11 before day 3, we will impute the worst (highest) value and for patients discharged alive before  
12 day 3, we will impute the best (lowest) value.  
13  
14  
15  
16  
17  
18  
19  
20  
21  
22  
23  
24  
25

26 For the secondary outcome of day 7 hsTnT, we will use the same approach. For patients  
27 who die before day 7, we will impute the worst (highest) value. For patients discharged alive  
28 before day 7, we will impute based on data available for other patients alive at day 7. The  
29 approach for all other biomarkers will be the same as for hsTnT.  
30  
31  
32  
33  
34

35 For SOFA over the first 7 days, we will use a linear mixed effects model to account for  
36 repeated measures within patients as well as the centre effect. For patients who die before day  
37 7, we will impute the worst (highest) value. For patients discharged alive before day 7, we  
38 will impute based on data available for patients in the same group alive at day 7. We will look  
39 for interaction between time and group as well as time trends. For TICS, we will use ordinal  
40 logistic regression with fixed effect for centre to compare the distribution of patients at 6  
41 months in 4 categories (death and 3 cognitive status categories [non-impaired, mild  
42 impairment, and moderate-severe impairment]). If proportional odds assumption does not  
43 hold, we will use multinomial regression to compare the two groups. If there is >5% loss to  
44 follow-up for TICS, we will conduct sensitivity analyses using multiple imputation  
45 techniques for the missing values. We will also report the proportion of patients in each  
46  
47  
48  
49  
50  
51  
52  
53  
54  
55  
56  
57  
58  
59  
60

1  
2  
3 category by arm and test for differences in separate categories of mortality and cognitive  
4  
5 impairment. For mortality, we will use a generalized linear mixed effect model with logit link  
6  
7 for 90 and 365 days separately. For pre-specified adverse events, we will report the proportion  
8  
9 of patients in each arm with the outcome and test for differences using chi-square test or  
10  
11 Fisher's exact test, as appropriate.  
12  
13

14 In sensitivity analyses, we will also adjust for pre-specified baseline covariates:  
15  
16 APACHE II, total dose of vasopressor administration before randomization (in  
17  
18 norepinephrine equivalents),<sup>55</sup> and history of hypertension, or coronary artery disease (angina,  
19  
20 myocardial infarction [MI], or coronary revascularisation).  
21  
22

23 No subgroup analyses are prespecified due to the small sample size. An updated  
24  
25 IPDMA<sup>18</sup> including data from existing trials,<sup>16 17</sup> the 65 trial,<sup>22</sup> and the current trial is under  
26  
27 consideration.  
28  
29

### 30 31 32 33 *Registration*

34  
35 The trial was registered on [www.clinicaltrials.gov](http://www.clinicaltrials.gov) on 13 February 2018 before  
36  
37 enrolling the first patient in the study (NCT03431181). Initially, the primary outcome was  
38  
39 listed as hsTnT at day 7; this error was subsequently corrected on 28 May 2020. Data will not  
40  
41 be analyzed until trial follow-up is complete in August 2020.  
42  
43  
44  
45  
46  
47

### 48 *Data management*

49  
50 Site research personnel record data on paper or electronic case report forms (CRFs)  
51  
52 within the secure REDCap EDC system. Data collected initially on paper are re-entered into  
53  
54 REDCap.  
55  
56  
57  
58  
59  
60

### *Monitoring*

Quality control measures include 1) training of site research and clinical personnel on eligibility assessment, study procedures, and data collection; 2) standard operating procedures for processing, storage, and shipping of blood and urine samples; 3) ongoing assessment of trial conduct, with monthly review of screening logs and reports for site enrolment, protocol adherence in the permissive hypotension arm and quality of study samples), and feedback to the clinical sites on recruitment and protocol adherence, benchmarked with other sites; 4) ongoing review of missing data and outlying values; and 5) rapid responses to frequently asked questions on the study website and monthly newsletter. For one site, we also conducted monitoring visits for 2 of the first 5 participants and 10% of the subsequent participants. Coordinating Centre staff and the Principal Investigators are available to answer study-related questions.

### *Trial oversight*

#### Executive Committee

The Executive Committee is comprised of Neill KJ Adhikari, M Elizabeth Wilcox, and François Lamontagne (co-principal investigators), Marie-Claude Battista (core laboratory), and Marie-Hélène Masse (project leader). The Executive Committee is responsible for day-to-day management.

#### Data Safety Monitoring Committee

The independent DSMC is responsible for safeguarding the interests of study participants, assessing the safety and efficacy of study procedures, and monitoring study conduct. DSMC members include a senior methodologist with DSMC Chair experience for

1  
2  
3 international RCTs, an experienced biostatistician, and a critical care clinician scientist  
4  
5 (online supplementary file S1). The DSMC met on an *ad hoc* basis to review reports of  
6  
7 unanticipated serious adverse events (SAEs) not predefined as study outcomes. In accordance  
8  
9 with a prespecified DSMC Charter, the DSMC advised the Executive Committee of concerns  
10  
11 related to participant safety and trial conduct. Following each meeting, the DSMC made a  
12  
13 recommendation for study continuation, continuation with modifications, temporary  
14  
15 suspension of enrolment, or termination. As noted above, the DSMC recommended  
16  
17 termination of enrolment in response to data from the 65 trial.<sup>22</sup>  
18  
19  
20  
21  
22

### 23 **Ethics and Dissemination**

24  
25  
26 This protocol was approved by the Comité d'éthique de la recherche du Centre intégré  
27  
28 universitaire de santé et de services sociaux de l'Estrie – Centre hospitalier universitaire de  
29  
30 Sherbrooke (MP-31-2018-1789). Before enrolment of the first participant, each clinical site  
31  
32 received local research ethics board (REB) approval and provided the Coordinating Centre  
33  
34 with their REB approval letter and informed consent form (sample in online supplementary  
35  
36 file S4). Protocol amendments were submitted to each REB and disseminated to all  
37  
38 investigators.  
39  
40  
41

42  
43 Site research personnel obtained informed consent by approaching eligible capable  
44  
45 patients directly. For eligible incapable patients, research personnel approached the substitute  
46  
47 decision-maker (SDM) to obtain consent in person or by telephone. Alternatively, where  
48  
49 permitted by the site REB, the patient was randomized with consent obtained later under a  
50  
51 deferred consent model. Consent was also requested for possible future laboratory analyses.  
52  
53

54  
55 Participants may discontinue participation in the OVATION-65 trial at any time. If a  
56  
57 participant wished to withdraw consent, we offered the following alternatives: 1) complete  
58  
59 withdrawal, which included no further study intervention (only relevant for participants in the  
60

1  
2  
3 permissive hypotension arm), data deletion, and sample destruction; 2) discontinuation of  
4 study intervention but permission for data collection (clinical data, sample collection,  
5 telephone follow-up); 3) discontinuation of study intervention, in-person follow-up, and  
6 sample collection but permission for telephone follow-up; or 4) discontinuation study  
7 intervention, sample collection, and in-person and telephone follow-up, but permission for  
8 access to medical records.  
9

10  
11 All personal health information collected remains confidential in a secure database.  
12 Participants are identified by an alphanumeric code, and the file linking the alphanumeric  
13 code to identifying information is securely stored by the local principal investigator.  
14

15  
16 There was no compensation for harm suffered from trial participation; details on data  
17 collection for adverse events are given above. Patients enrolled in this trial were critically ill,  
18 with daily care provided by intensivists. There was no provision for post-trial care.  
19

20  
21 Plans for end-of-grant dissemination include presentations at international critical care  
22 conferences and journal publications. In addition, building on the experience with social  
23 media during the OVATION pilot trial, we will disseminate our results via social media  
24 platforms and discussion forums managed by partner organizations.  
25

26  
27 Authorship of the trial manuscript will be based on leadership roles in trial  
28 management and at clinical sites, specific expertise (e.g. methodological, laboratory), and  
29 contributions as defined by International Committee of Medical Journal Editors criteria.  
30

### 31 **Data statement**

32  
33 The OVATION-65 protocol is freely accessible via this publication. The principal  
34 investigators, project leader, and study statisticians will have access to the full trial dataset;  
35 there are no contractual limitations to such access. Requests for access to the participant-level  
36 dataset and statistical code will be considered by the Executive Committee after publication  
37 of primary results and planned secondary studies by co-investigators.  
38  
39  
40  
41  
42  
43  
44  
45  
46  
47  
48  
49  
50  
51  
52  
53  
54  
55  
56  
57  
58  
59  
60

**Trial status**

The current protocol is version 6, dated 29 November 2019. Participant recruitment began on 17 February 2018 and was scheduled to continue until approximately June 2020. As noted, the DSMC recommended termination of enrollment on 21 February 2020. The database will be locked after the last enrolled patient completes the 6-month follow-up in August 2020, and 6 additional months will be required to address remaining data queries and to finalize the analyses.

**Contact information for trial sponsor**

François Lamontagne (francois.lamontagne@usherbrooke.ca)  
Université de Sherbrooke  
3001 12e Avenue Nord  
Sherbrooke QC J1H 5 N4 Canada

### Authors' contributions

NA and FLam drafted the protocol for the OVATION-65 trial and drafted the manuscript; they contributed equally and co-senior authors. MHM, MCB, MEW, RPi, NM, FD'A, CS-A, MM, M-AL, HQM, BGB, YP, ECa, AJES, IW, RPo, MC, ML, FLau, AT, DB, SM, ECh, EB-C, EB, and DC contributed to protocol development and revised the manuscript. MHM, MCB, MEW, FLam, and NA on the Executive Committee. All authors read and approved the final manuscript.

### Competing interests

The authors declare that they have no competing interests.

### Funding statement

OVATION-65 is funded by the Lotte and John Hecht Memorial Foundation (grant no. 4410); internal grants from the Université de Sherbrooke/Merck Sharp and Dohme and the Centre de recherche du CHUS/Projet Structurant; and a research chair awarded to François Lamontagne (Chaire de recherche axée sur le patient et les soins hospitaliers aigus). The funders and institutional sponsor had no role in the design of the study, ongoing data collection, planned data analysis and interpretation, or writing of this manuscript or of the study protocol. François Lamontagne is supported by an award from the Fonds de recherche du Québec - Santé.

### Acknowledgements

We thank the Unité de Recherche Clinique et Épidémiologique of the Centre de Recherche du Centre Hospitalier Universitaire de Sherbrooke for their commitment to the coordination of the study; and Claudio Martin for a careful review of an earlier version of this manuscript, on behalf of the Canadian Critical Care Trials Group Grants and Manuscripts Committee.

**Word count** [main text] 5130



## References

1. Hollenberg SM. Vasoactive drugs in circulatory shock. *Am J Respir Crit Care Med* 2011;183(7):847-55. doi: 201006-0972CI [pii]  
10.1164/rccm.201006-0972CI [published Online First: 2010/11/26]
2. Andreis DT, Singer M. Catecholamines for inflammatory shock: a Jekyll-and-Hyde conundrum. *Intensive Care Med* 2016;42(9):1387-97. doi: 10.1007/s00134-016-4249-z
3. Singer M. Catecholamine treatment for shock--equally good or bad? *Lancet* 2007;370(9588):636-7.
4. Singer M, Glynne P. Treating critical illness: the importance of first doing no harm. *PLoS Medicine / Public Library of Science* 2005;2(6):e167.
5. Walkey AJ, Adhikari NKJ, Day AG, et al. Mediation Analysis of High Blood Pressure Targets, Arrhythmias, and Shock Mortality. *Am J Respir Crit Care Med* 2019;199(6):802-05. doi: 10.1164/rccm.201808-1435LE
6. Girardis M, Busani S, Damiani E, et al. Effect of Conservative vs Conventional Oxygen Therapy on Mortality Among Patients in an Intensive Care Unit: The Oxygen-ICU Randomized Clinical Trial. *JAMA* 2016;316(15):1583-89. doi: 10.1001/jama.2016.11993
7. Arabi YM, Aldawood AS, Al-Dorzi HM, et al. Permissive Underfeeding or Standard Enteral Feeding in High- and Low-Nutritional-Risk Critically Ill Adults. Post Hoc Analysis of the PermiT Trial. *Am J Respir Crit Care Med* 2017;195(5):652-62. doi: 10.1164/rccm.201605-1012OC [published Online First: 2016/09/03]
8. Ventilation with lower tidal volumes as compared with traditional tidal volumes for acute lung injury and the acute respiratory distress syndrome. The Acute Respiratory Distress Syndrome Network. *The New England journal of medicine* 2000;342(18):1301-8.
9. Hebert PC, Wells G, Blajchman MA, et al. A multicenter, randomized, controlled clinical trial of transfusion requirements in critical care. Transfusion Requirements in Critical Care Investigators, Canadian Critical Care Trials Group. *The New England journal of medicine* 1999;340(6):409-17.
10. Bickell WH, Wall MJ, Jr., Pepe PE, et al. Immediate versus delayed fluid resuscitation for hypotensive patients with penetrating torso injuries. *The New England journal of medicine* 1994;331(17):1105-9. doi: 10.1056/NEJM199410273311701 [published Online First: 1994/10/27]
11. Rhodes A, Evans LE, Alhazzani W, et al. Surviving Sepsis Campaign: International Guidelines for Management of Sepsis and Septic Shock: 2016. *Intensive Care Med* 2017;43(3):304-77. doi: 10.1007/s00134-017-4683-6 [published Online First: 2017/01/20]
12. Lamontagne F, Cook DJ, Meade MO, et al. Vasopressor Use for Severe Hypotension-A Multicentre Prospective Observational Study. *PLoS One* 2017;12(1):e0167840. doi: 10.1371/journal.pone.0167840
13. Lamontagne F, Cook DJ, Adhikari NKJ, et al. Vasopressor administration and sepsis: A survey of Canadian intensivists. *Journal of Critical Care* 2011;26(5) doi: 10.1016/j.jcrc.2011.01.005
14. Schmittinger CA, Torgersen C, Luckner G, et al. Adverse cardiac events during catecholamine vasopressor therapy: a prospective observational study. *Intensive Care Med* 2012;38(6):950-8. doi: 10.1007/s00134-012-2531-2 [published Online First: 2012/04/25]

15. Dunser MW, Ruokonen E, Pettila V, et al. Association of arterial blood pressure and vasopressor load with septic shock mortality: a post hoc analysis of a multicenter trial. *Crit Care* 2009;13(6):R181. doi: cc8167 [pii] 10.1186/cc8167 [published Online First: 2009/11/18]
16. Asfar P, Meziani F, Hamel JF, et al. High versus Low Blood-Pressure Target in Patients with Septic Shock. *The New England journal of medicine* 2014 doi: 10.1056/NEJMoa1312173 [published Online First: 2014/03/19]
17. Lamontagne F, Meade MO, Hebert PC, et al. Higher versus lower blood pressure targets for vasopressor therapy in shock: a multicentre pilot randomized controlled trial. *Intensive Care Med* 2016;42(4):542-50. doi: 10.1007/s00134-016-4237-3
18. Lamontagne F, Day AG, Meade MO, et al. Pooled analysis of higher versus lower blood pressure targets for vasopressor therapy septic and vasodilatory shock. *Intensive Care Med* 2018;44(1):12-21. doi: 10.1007/s00134-017-5016-5 [published Online First: 2017/12/21]
19. Rochweg B, Hylands M, Moller M, et al. CCCS-SSAI WikiRecs Clinical Practice Guideline: vasopressor blood pressure targets in critically ill adults with hypotension. *Can J Anaesth* 2017;64(7):763-65. doi: 10.1007/s12630-017-0878-0 [published Online First: 2017/05/13]
20. Richards-Belle A, Mouncey PR, Grieve RD, et al. Evaluating the clinical and cost-effectiveness of permissive hypotension in critically ill patients aged 65 years or over with vasodilatory hypotension: Protocol for the 65 randomised clinical trial. *J Intensive Care Soc* 2019:1751143719870088. doi: 10.1177/1751143719870088
21. Thomas K, Patel A, Sadique MZ, et al. Evaluating the clinical and cost-effectiveness of permissive hypotension in critically ill patients aged 65 years or over with vasodilatory hypotension: Statistical and Health Economic Analysis Plan for the 65 trial. *J Intensive Care Soc* 2019:1751143719860387. doi: 10.1177/1751143719860387
22. Lamontagne F, Richards-Belle A, Thomas K, et al. Effect of Reduced Exposure to Vasopressors on 90-Day Mortality in Older Critically Ill Patients With Vasodilatory Hypotension: A Randomized Clinical Trial. *JAMA* 2020;323(10):939-49. doi: 10.1001/jama.2020.0930 [published Online First: 2020/02/13]
23. Vincent JL, Moreno R, Takala J, et al. The SOFA (Sepsis-related Organ Failure Assessment) score to describe organ dysfunction/failure. On behalf of the Working Group on Sepsis-Related Problems of the European Society of Intensive Care Medicine. *Intensive Care Med* 1996;22(7):707-10. doi: 10.1007/bf01709751 [published Online First: 1996/07/01]
24. Petros AJ, Marshall JC, van Saene HK. Should morbidity replace mortality as an endpoint for clinical trials in intensive care? *Lancet* 1995;345(8946):369-71. doi: 10.1016/s0140-6736(95)90347-x [published Online First: 1995/02/11]
25. Svensson S, Menkes DB, Lexchin J. Surrogate outcomes in clinical trials: a cautionary tale. *JAMA Intern Med* 2013;173(8):611-2. doi: 10.1001/jamainternmed.2013.3037 [published Online First: 2013/03/27]
26. Masse MH, Menard J, Sprague S, et al. Lessening Organ dysfunction with VITamin C (LOVIT): protocol for a randomized controlled trial. *Trials* 2020;21(1):42. doi: 10.1186/s13063-019-3834-1 [published Online First: 2020/01/10]
27. Harris PA, Taylor R, Minor BL, et al. The REDCap consortium: Building an international community of software platform partners. *J Biomed Inform* 2019;95:103208. doi: 10.1016/j.jbi.2019.103208 [published Online First: 2019/05/13]
28. Harris PA, Taylor R, Thielke R, et al. Research electronic data capture (REDCap)--a metadata-driven methodology and workflow process for providing translational

- 1  
2  
3 research informatics support. *J Biomed Inform* 2009;42(2):377-81. doi:  
4 10.1016/j.jbi.2008.08.010 [published Online First: 2008/10/22]  
5  
6 29. Angriman F, Masse MH, Adhikari NKJ. Defining standard of practice: pros and cons of  
7 the usual care arm. *Curr Opin Crit Care* 2019;25(5):498-504. doi:  
8 10.1097/MCC.0000000000000642 [published Online First: 2019/07/25]  
9  
10 30. Bellani G, Laffey JG, Pham T, et al. Epidemiology, Patterns of Care, and Mortality for  
11 Patients With Acute Respiratory Distress Syndrome in Intensive Care Units in 50  
12 Countries. *JAMA* 2016;315(8):788-800. doi: 10.1001/jama.2016.0291  
13  
14 31. Schortgen F, Schetz M. Does this critically ill patient with oliguria need more fluids, a  
15 vasopressor, or neither? *Intensive Care Med* 2017;43(6):907-10. doi: 10.1007/s00134-  
16 017-4744-x [published Online First: 2017/03/16]  
17  
18 32. Brown SM, Lanspa MJ, Jones JP, et al. Survival after shock requiring high-dose  
19 vasopressor therapy. *Chest* 2013;143(3):664-71. doi: 10.1378/chest.12-1106  
20 [published Online First: 2012/08/23]  
21  
22 33. Lim W, Qushmaq I, Devereaux PJ, et al. Elevated cardiac troponin measurements in  
23 critically ill patients. *Arch Intern Med* 2006;166(22):2446-54. doi:  
24 10.1001/archinte.166.22.2446  
25  
26 34. Masson S, Caironi P, Fanizza C, et al. Sequential N-Terminal Pro-B-Type Natriuretic  
27 Peptide and High-Sensitivity Cardiac Troponin Measurements During Albumin  
28 Replacement in Patients With Severe Sepsis or Septic Shock. *Crit Care Med*  
29 2016;44(4):707-16. doi: 10.1097/CCM.0000000000001473  
30  
31 35. Poe S, Vandivier-Pletsch RH, Clay M, et al. Cardiac Troponin Measurement in the  
32 Critically Ill: Potential for Guiding Clinical Management. *J Investig Med*  
33 2015;63(8):905-15. doi: 10.1097/JIM.0000000000000239  
34  
35 36. Rosjo H, Varpula M, Hagve TA, et al. Circulating high sensitivity troponin T in severe  
36 sepsis and septic shock: distribution, associated factors, and relation to outcome.  
37 *Intensive Care Med* 2011;37(1):77-85. doi: 10.1007/s00134-010-2051-x  
38  
39 37. Waxman DA, Hecht S, Schappert J, et al. A model for troponin I as a quantitative  
40 predictor of in-hospital mortality. *J Am Coll Cardiol* 2006;48(9):1755-62. doi:  
41 10.1016/j.jacc.2006.05.075  
42  
43 38. Goodwill AG, Dick GM, Kiel AM, et al. Regulation of Coronary Blood Flow. *Compr*  
44 *Physiol* 2017;7(2):321-82. doi: 10.1002/cphy.c160016 [published Online First:  
45 2017/03/24]  
46  
47 39. Glushakova OY, Glushakov AV, Miller ER, et al. Biomarkers for acute diagnosis and  
48 management of stroke in neurointensive care units. *Brain Circ* 2016;2(1):28-47. doi:  
49 10.4103/2394-8108.178546 [published Online First: 2016/01/01]  
50  
51 40. Shemilt M, Boutin A, Lauzier F, et al. Prognostic Value of Glial Fibrillary Acidic Protein  
52 in Patients With Moderate and Severe Traumatic Brain Injury: A Systematic Review  
53 and Meta-Analysis. *Crit Care Med* 2019;47(6):e522-e29. doi:  
54 10.1097/CCM.0000000000003728 [published Online First: 2019/03/20]  
55  
56 41. Fink EL, Berger RP, Clark RS, et al. Serum biomarkers of brain injury to classify  
57 outcome after pediatric cardiac arrest\*. *Critical care medicine* 2014;42(3):664-74. doi:  
58 10.1097/01.ccm.0000435668.53188.80 [published Online First: 2013/10/30]  
59  
60 42. Anderson BJ, Reilly JP, Shashaty MGS, et al. Admission plasma levels of the neuronal  
injury marker neuron-specific enolase are associated with mortality and delirium in  
sepsis. *J Crit Care* 2016;36:18-23. doi: 10.1016/j.jcrc.2016.06.012 [published Online  
First: 2016/11/05]

- 1
- 2
- 3
- 4 43. Thomson SJ, Cowan ML, Johnston I, et al. 'Liver function tests' on the intensive care unit:  
5 a prospective, observational study. *Intensive Care Med* 2009;35(8):1406-11. doi:  
6 10.1007/s00134-009-1511-7 [published Online First: 2009/06/11]
- 7 44. Derikx JP, Schellekens DH, Acosta S. Serological markers for human intestinal ischemia:  
8 A systematic review. *Best Pract Res Clin Gastroenterol* 2017;31(1):69-74. doi:  
9 10.1016/j.bpg.2017.01.004
- 10 45. Shapiro ML, Baldea A, Luchette FA. Rhabdomyolysis in the intensive care unit. *J*  
11 *Intensive Care Med* 2012;27(6):335-42. doi: 10.1177/0885066611402150 [published  
12 Online First: 2011/03/26]
- 13 46. Kraut JA, Madias NE. Lactic acidosis. *The New England journal of medicine*  
14 2014;371(24):2309-19. doi: 10.1056/NEJMra1309483 [published Online First:  
15 2014/12/11]
- 16 47. Kidney Disease: Improving Global Outcomes (KDIGO) Acute Kidney Injury Work  
17 Group. KDIGO Clinical Practice Guideline for Acute Kidney Injury. *Kidney Int Suppl*  
18 (2011) 2012;2:1-138.
- 19 48. Walkey AJ, Wiener RS, Ghobrial JM, et al. Incident stroke and mortality associated with  
20 new-onset atrial fibrillation in patients hospitalized with severe sepsis. *JAMA*  
21 2011;306(20):2248-54. doi: 10.1001/jama.2011.1615
- 22 49. Knopman DS, Roberts RO, Geda YE, et al. Validation of the telephone interview for  
23 cognitive status-modified in subjects with normal cognition, mild cognitive  
24 impairment, or dementia. *Neuroepidemiology* 2010;34(1):34-42. doi:  
25 10.1159/000255464 [published Online First: 2009/11/07]
- 26 50. Cook D, Lauzier F, Rocha MG, et al. Serious adverse events in academic critical care  
27 research. *CMAJ : Canadian Medical Association journal = journal de l'Association*  
28 *medicale canadienne* 2008;178(9):1181-4. doi: 10.1503/cmaj.071366 [published  
29 Online First: 2008/04/23]
- 30 51. Knaus WA, Draper EA, Wagner DP, et al. APACHE II: a severity of disease classification  
31 system. *Crit Care Med* 1985;13(10):818-29. [published Online First: 1985/10/01]
- 32 52. Rockwood K, Song X, MacKnight C, et al. A global clinical measure of fitness and frailty  
33 in elderly people. *CMAJ : Canadian Medical Association journal = journal de*  
34 *l'Association medicale canadienne* 2005;173(5):489-95. doi: 10.1503/cmaj.050051  
35 [published Online First: 2005/09/01]
- 36 53. Cohen J. *Statistical Power Analysis for the Behavioral Sciences*, 2nd ed. New York:  
37 Lawrence Erlbaum Associates 1988.
- 38 54. Weuve J, Tchetgen Tchetgen EJ, Glymour MM, et al. Accounting for bias due to selective  
39 attrition: the example of smoking and cognitive decline. *Epidemiology*  
40 2012;23(1):119-28. doi: 10.1097/EDE.0b013e318230e861 [published Online First:  
41 2011/10/13]
- 42 55. Russell JA, Walley KR, Singer J, et al. Vasopressin versus norepinephrine infusion in  
43 patients with septic shock. *The New England journal of medicine* 2008;358(9):877-87.  
44 doi: 10.1056/NEJMoa067373 [published Online First: 2008/02/29]
- 45
- 46
- 47
- 48
- 49
- 50
- 51
- 52
- 53
- 54
- 55
- 56
- 57
- 58
- 59
- 60

**Online supplementary files**

S1 (.pdf format)  
SPIRIT checklist.

S2 (.pdf format)  
OVATION-65 contributors.

S3 (.pdf format)  
Ancillary studies.

S4 (.pdf format)  
Model informed consent form.

**Figure legend**

Figure 1. Progress of patients through the trial. 'Co-enrolled in another study' refers to a study for which the principal investigators of OVATION-65 or the other study had prespecified that co-enrolment would not be allowed.

Table 1 Summary of objectives and outcomes

| Objectives                        | Outcomes                                                                                                                                                            |
|-----------------------------------|---------------------------------------------------------------------------------------------------------------------------------------------------------------------|
| <b>Biomarkers of organ injury</b> |                                                                                                                                                                     |
| Heart                             | High-sensitivity cardiac troponin T (hsTnT) [primary outcome]<br>N-terminal pro-B-type natriuretic peptide (NT-proBNP)                                              |
| Brain                             | Glial fibrillary acidic protein (GFAP)<br>Myelin basic protein (MBP)<br>Neuron-specific enolase (NSE)                                                               |
| Liver                             | Alanine aminotransferase (ALT)                                                                                                                                      |
| Intestine                         | Intestinal-type fatty acid binding protein (FABP)                                                                                                                   |
| Skeletal muscle                   | Creatinine kinase (CK)                                                                                                                                              |
| <b>Global tissue dysoxia</b>      | Lactate                                                                                                                                                             |
| <b>Organ function</b>             | Sequential Organ Failure Assessment (SOFA) score on days 2, 3, 4, 7, 10, 14, and 28 while in the ICU (an additional measurement is taken on day 1 [baseline])       |
| <b>Resource utilization</b>       | Duration of mechanical ventilation<br>Duration of renal replacement therapy<br>Duration of vasopressor therapy<br>Duration of ICU stay<br>Duration of hospital stay |
| <b>Adverse events</b>             | Clinically detected supraventricular arrhythmia<br>Stroke<br>Acute kidney injury (KDIGO stage 3)<br>Limb ischemia<br>Intestinal ischemia                            |
| <b>Mortality</b>                  | 90 days<br>6 months                                                                                                                                                 |
| <b>Cognitive impairment</b>       | Telephone Interview for Cognitive Status (TICS) at 6 months                                                                                                         |

KDIGO, Kidney Disease: Improving Global Outcomes.

All biomarkers of organ injury and lactate are measured in plasma (except for NSE, measured in serum) at days 3 and 7, with an additional measurement at baseline (day 1).

Table 2 OVATION-65 Trial Timeline

|                                                                           | Study Period             |                 |   |   |         |   |         |    |           |    |           |    |             |
|---------------------------------------------------------------------------|--------------------------|-----------------|---|---|---------|---|---------|----|-----------|----|-----------|----|-------------|
|                                                                           | Days                     | Days            |   |   |         |   |         |    |           |    |           |    | Months      |
|                                                                           | Enrolment/<br>Allocation | Post-Allocation |   |   |         |   |         |    |           |    |           |    |             |
| TIME POINTS                                                               | 1                        | 2               | 3 | 4 | 5-<br>6 | 7 | 8-<br>9 | 10 | 11-<br>13 | 14 | 15-<br>27 | 28 | 6<br>months |
| <b>ENROLMENT:</b>                                                         |                          |                 |   |   |         |   |         |    |           |    |           |    |             |
| Eligibility screen                                                        | x                        |                 |   |   |         |   |         |    |           |    |           |    |             |
| Informed consent                                                          | x                        |                 |   |   |         |   |         |    |           |    |           |    |             |
| Allocation                                                                | x                        |                 |   |   |         |   |         |    |           |    |           |    |             |
| <b>INTERVENTION:</b>                                                      |                          |                 |   |   |         |   |         |    |           |    |           |    |             |
| Permissive hypotension<br>(MAP 60-65 mmHg)<br>vs. usual care <sup>a</sup> |                          |                 |   |   |         |   |         |    |           |    |           | →  |             |
| <b>ASSESSMENTS:</b>                                                       |                          |                 |   |   |         |   |         |    |           |    |           |    |             |
| <b>Baseline variables</b>                                                 |                          |                 |   |   |         |   |         |    |           |    |           |    |             |
| Diagnosis of admission                                                    | x                        |                 |   |   |         |   |         |    |           |    |           |    |             |
| Severity of illness<br>(APACHE II score)                                  | x                        |                 |   |   |         |   |         |    |           |    |           |    |             |
| Pre-existing<br>comorbidities<br>(Clinical Frailty Score)                 | x                        |                 |   |   |         |   |         |    |           |    |           |    |             |
| <b>Outcomes</b>                                                           |                          |                 |   |   |         |   |         |    |           |    |           |    |             |
| hsTnT <sup>b</sup>                                                        | x                        |                 | x |   |         | x |         |    |           |    |           |    |             |
| Biomarkers of organ<br>injury <sup>c</sup>                                | x                        |                 | x |   |         | x |         |    |           |    |           |    |             |
| Global tissue dysoxia<br>(lactate)                                        | x                        |                 | x |   |         | x |         |    |           |    |           |    |             |
| Organ function<br>including renal<br>function (SOFA score)                | x                        | x               | x | x |         | x |         | x  |           | x  |           | x  |             |
| Resource utilization <sup>d</sup>                                         |                          |                 |   |   |         |   |         |    |           |    |           | →  |             |
| Mortality at 90 days<br>and 6 months                                      |                          |                 |   |   |         |   |         |    |           |    |           | →  | x           |
| Cognitive impairment<br>(TICS) at 6 months                                |                          |                 |   |   |         |   |         |    |           |    |           |    | x           |
| Stroke                                                                    |                          |                 |   |   |         |   |         |    |           |    |           | →  |             |
| Clinically detected<br>supraventricular<br>arrhythmia                     |                          |                 |   |   |         |   |         |    |           |    |           | →  |             |
| Limb or intestinal<br>ischemia                                            |                          |                 |   |   |         |   |         |    |           |    |           | →  |             |
| Stage 3 acute kidney<br>injury <sup>e</sup>                               |                          |                 |   |   |         |   |         |    |           |    |           | →  |             |
| <b>Other variables</b>                                                    |                          |                 |   |   |         |   |         |    |           |    |           |    |             |
| Protocol adherence <sup>f</sup>                                           |                          |                 |   |   |         |   |         |    |           |    |           | →  |             |
| Co-interventions <sup>g</sup>                                             |                          |                 |   |   |         |   |         |    |           |    |           | →  |             |

ALT, alanine aminotransferase; CK, creatinine kinase; FABP, intestinal-type fatty acid binding protein; GFAP, glial fibrillary acidic protein; hsTnT, high-sensitivity cardiac troponin T; KDIGO (Kidney Disease: Improving

1  
2  
3 Global Outcomes; MAP, mean arterial pressure; MBP, myelin basic protein; NSE, neuron-specific enolase; NT-  
4 proBNP, N-terminal pro-B-type natriuretic peptide  
5

6 <sup>a</sup> MAP target while receiving vasopressor therapy up to day 28, or discontinuation for more than 24 hours.

7 <sup>b</sup> hs TnT at day 3 is the primary outcome and at day 7 is a secondary outcome

8 <sup>c</sup> NT-proBNP, GFAP, MBP, NSE, ALT, FABP, CK

9 <sup>d</sup> Duration of mechanical ventilation, renal replacement therapy, vasopressor therapy, ICU and hospital stay

10 <sup>e</sup> As defined by KDIGO criteria

11 <sup>f</sup> See text for definition

12 <sup>g</sup> See text for definition  
13  
14  
15  
16  
17  
18  
19  
20  
21  
22  
23  
24  
25  
26  
27  
28  
29  
30  
31  
32  
33  
34  
35  
36  
37  
38  
39  
40  
41  
42  
43  
44  
45  
46  
47  
48  
49  
50  
51  
52  
53  
54  
55  
56  
57  
58  
59  
60

For peer review only



Table 3 Baseline characteristics

| Characteristic                                                                       | Permissive hypotension (n= ) | Usual care (n= ) |
|--------------------------------------------------------------------------------------|------------------------------|------------------|
| <i>Demographics</i>                                                                  |                              |                  |
| Age, years, mean (SD)                                                                |                              |                  |
| Female sex, n (%)                                                                    |                              |                  |
| Weight, kg; mean (SD)                                                                |                              |                  |
| Clinical Frailty Scale <sup>a</sup> >4, n (%)                                        |                              |                  |
| APACHE II <sup>b</sup> , mean (SD)                                                   |                              |                  |
| SOFA <sup>c</sup> , mean (SD)                                                        |                              |                  |
| <i>Comorbidities</i>                                                                 |                              |                  |
| Cardiac                                                                              |                              |                  |
| Supraventricular arrhythmia, n (%)                                                   |                              |                  |
| Ventricular arrhythmia, n (%)                                                        |                              |                  |
| Coronary artery disease <sup>d</sup> , n (%)                                         |                              |                  |
| Congestive Heart Failure, class 1-3, n (%)                                           |                              |                  |
| Congestive Heart Failure, class 4, n (%)                                             |                              |                  |
| Left ventricular ejection fraction, % (mean, SD)                                     |                              |                  |
| Vascular, n (%)                                                                      |                              |                  |
| Known hypertension                                                                   |                              |                  |
| Peripheral vascular disease or claudication                                          |                              |                  |
| Cerebrovascular disease                                                              |                              |                  |
| Diabetes (type 1 or 2), n (%)                                                        |                              |                  |
| Renal, n (%)                                                                         |                              |                  |
| Receiving chronic dialysis                                                           |                              |                  |
| Baseline creatinine <sup>e</sup> , $\mu\text{mol/L}$ , mean (SD)                     |                              |                  |
| Child's B or C cirrhosis, n (%)                                                      |                              |                  |
| Chronic lung disease, n (%)                                                          |                              |                  |
| Immunosuppression, n (%)                                                             |                              |                  |
| Cognitive impairment or dementia, n (%)                                              |                              |                  |
| <i>ICU admission data</i>                                                            |                              |                  |
| Primary ICU diagnosis, n (%)                                                         |                              |                  |
| Medical                                                                              |                              |                  |
| Surgical                                                                             |                              |                  |
| Transfer from another hospital, n (%)                                                |                              |                  |
| Time from hospital admission to randomization, hours; mean (SD)                      |                              |                  |
| Time from ICU admission to randomization, hours; mean (SD)                           |                              |                  |
| Vasopressor dose, mean norepinephrine equivalents (mean $\mu\text{g/kg/min}$ , [SD]) |                              |                  |
| Vasopressors, n (%)                                                                  |                              |                  |
| Norepinephrine                                                                       |                              |                  |
| Epinephrine                                                                          |                              |                  |
| Dopamine                                                                             |                              |                  |
| Phenylephrine                                                                        |                              |                  |
| Vasopressin                                                                          |                              |                  |
| Inotropes, n (%)                                                                     |                              |                  |
| Dobutamine                                                                           |                              |                  |
| Milrinone                                                                            |                              |                  |
| Mean arterial pressure, mmHg; mean (SD)                                              |                              |                  |

1  
2  
3  
4 APACHE II, acute physiology and chronic health evaluation II, CABG, coronary artery bypass grafting; ICU,  
5 intensive care unit; MI, myocardial infarction; PCI, percutaneous coronary intervention  
6

7 <sup>a</sup>The Clinical Frailty Scale<sup>52</sup> ranges from 1 to 7, with scores of 5-7 denoting frailty.

8 <sup>b</sup>Scores on the APACHE II<sup>51</sup> range from 0 to 71, with higher scores indicating more severe disease and a higher  
9 risk of death.

10 <sup>b</sup>Scores on the SOFA<sup>23</sup> range from 0 to 24, with higher scores indicating more severe  
11 disease and a higher risk of death.

12 <sup>d</sup>Coronary artery disease included angina and previous MI, PCI, or CABG.

13 <sup>e</sup>Baseline creatinine was determined from the outpatient creatinine within the last 12 months and closest to  
14 admission (n= ) or, if not available, then the lowest inpatient creatinine before ICU admission (n= ).  
15  
16  
17  
18  
19  
20  
21  
22  
23  
24  
25  
26  
27  
28  
29  
30  
31  
32  
33  
34  
35  
36  
37  
38  
39  
40  
41  
42  
43  
44  
45  
46  
47  
48  
49  
50  
51  
52  
53  
54  
55  
56  
57  
58  
59  
60

For peer review only

1  
2  
3  
4  
5  
6  
7  
8  
9  
10  
11  
12  
13  
14  
15  
16  
17  
18  
19  
20  
21  
22  
23  
24  
25  
26  
27  
28  
29  
30  
31  
32  
33  
34  
35  
36  
37  
38  
39  
40  
41





Page numbers refer to the Microsoft Word version of the manuscript (revision 1).

SPIRIT 2013 Checklist: Recommended items to address in a clinical trial protocol and related documents\*

| Section/item                      | Item No | Description                                                                                                                                                                                                                                                                              | Addressed on page number |
|-----------------------------------|---------|------------------------------------------------------------------------------------------------------------------------------------------------------------------------------------------------------------------------------------------------------------------------------------------|--------------------------|
| <b>Administrative information</b> |         |                                                                                                                                                                                                                                                                                          |                          |
| Title                             | 1       | Descriptive title identifying the study design, population, interventions, and, if applicable, trial acronym                                                                                                                                                                             | 1                        |
| Trial registration                | 2a      | Trial identifier and registry name. If not yet registered, name of intended registry                                                                                                                                                                                                     | 4, 21                    |
|                                   | 2b      | All items from the World Health Organization Trial Registration Data Set                                                                                                                                                                                                                 | 4, 21                    |
| Protocol version                  | 3       | Date and version identifier                                                                                                                                                                                                                                                              | 24                       |
| Funding                           | 4       | Sources and types of financial, material, and other support                                                                                                                                                                                                                              | 25                       |
| Roles and responsibilities        | 5a      | Names, affiliations, and roles of protocol contributors                                                                                                                                                                                                                                  | 1, 26                    |
|                                   | 5b      | Name and contact information for the trial sponsor                                                                                                                                                                                                                                       | 25                       |
|                                   | 5c      | Role of study sponsor and funders, if any, in study design; collection, management, analysis, and interpretation of data; writing of the report; and the decision to submit the report for publication, including whether they will have ultimate authority over any of these activities | 26                       |
|                                   | 5d      | Composition, roles, and responsibilities of the coordinating centre, steering committee, endpoint adjudication committee, data management team, and other individuals or groups overseeing the trial, if applicable (see Item 21a for data monitoring committee)                         | 9, 22-23                 |

|    |                                                           |     |                                                                                                               |             |
|----|-----------------------------------------------------------|-----|---------------------------------------------------------------------------------------------------------------|-------------|
| 1  | <b>Introduction</b>                                       |     |                                                                                                               |             |
| 2  |                                                           |     |                                                                                                               |             |
| 3  | Background and                                            | 6a  | Description of research question and justification for undertaking the trial, including summary of relevant   |             |
| 4  | rationale                                                 |     | studies (published and unpublished) examining benefits and harms for each intervention                        | 6-8         |
| 5  |                                                           |     |                                                                                                               |             |
| 6  |                                                           | 6b  | Explanation for choice of comparators                                                                         | 7-8, 11-12  |
| 7  |                                                           |     |                                                                                                               |             |
| 8  | Objectives                                                | 7   | Specific objectives or hypotheses                                                                             | 8           |
| 9  |                                                           |     |                                                                                                               |             |
| 10 | Trial design                                              | 8   | Description of trial design including type of trial (eg, parallel group, crossover, factorial, single group), |             |
| 11 |                                                           |     | allocation ratio, and framework (eg, superiority, equivalence, noninferiority, exploratory)                   | 9           |
| 12 |                                                           |     |                                                                                                               |             |
| 13 |                                                           |     |                                                                                                               |             |
| 14 | <b>Methods: Participants, interventions, and outcomes</b> |     |                                                                                                               |             |
| 15 |                                                           |     |                                                                                                               |             |
| 16 | Study setting                                             | 9   | Description of study settings (eg, community clinic, academic hospital) and list of countries where data will | 9, suppl S1 |
| 17 |                                                           |     | be collected. Reference to where list of study sites can be obtained                                          |             |
| 18 |                                                           |     |                                                                                                               |             |
| 19 | Eligibility criteria                                      | 10  | Inclusion and exclusion criteria for participants. If applicable, eligibility criteria for study centres and  | 9-10        |
| 20 |                                                           |     | individuals who will perform the interventions (eg, surgeons, psychotherapists)                               |             |
| 21 |                                                           |     |                                                                                                               |             |
| 22 | Interventions                                             | 11a | Interventions for each group with sufficient detail to allow replication, including how and when they will be | 10-12       |
| 23 |                                                           |     | administered                                                                                                  |             |
| 24 |                                                           |     |                                                                                                               |             |
| 25 |                                                           | 11b | Criteria for discontinuing or modifying allocated interventions for a given trial participant (eg, drug dose  | 16-17       |
| 26 |                                                           |     | change in response to harms, participant request, or improving/worsening disease)                             |             |
| 27 |                                                           |     |                                                                                                               |             |
| 28 |                                                           | 11c | Strategies to improve adherence to intervention protocols, and any procedures for monitoring adherence        | 16-17       |
| 29 |                                                           |     | (eg, drug tablet return, laboratory tests)                                                                    |             |
| 30 |                                                           |     |                                                                                                               |             |
| 31 |                                                           | 11d | Relevant concomitant care and interventions that are permitted or prohibited during the trial                 | 12-13       |
| 32 |                                                           |     |                                                                                                               |             |
| 33 | Outcomes                                                  | 12  | Primary, secondary, and other outcomes, including the specific measurement variable (eg, systolic blood       |             |
| 34 |                                                           |     | pressure), analysis metric (eg, change from baseline, final value, time to event), method of aggregation (eg, | 13-15       |
| 35 |                                                           |     | median, proportion), and time point for each outcome. Explanation of the clinical relevance of chosen         |             |
| 36 |                                                           |     | efficacy and harm outcomes is strongly recommended                                                            |             |
| 37 |                                                           |     |                                                                                                               |             |
| 38 | Participant timeline                                      | 13  | Time schedule of enrolment, interventions (including any run-ins and washouts), assessments, and visits for   | 33-34       |
| 39 |                                                           |     | participants. A schematic diagram is highly recommended (see Figure)                                          |             |
| 40 |                                                           |     |                                                                                                               |             |
| 41 |                                                           |     |                                                                                                               |             |
| 42 |                                                           |     |                                                                                                               |             |

|    |                                                                     |     |                                                                                                                                                                                                                                                                                                                                                                                                              |             |
|----|---------------------------------------------------------------------|-----|--------------------------------------------------------------------------------------------------------------------------------------------------------------------------------------------------------------------------------------------------------------------------------------------------------------------------------------------------------------------------------------------------------------|-------------|
| 1  | Sample size                                                         | 14  | Estimated number of participants needed to achieve study objectives and how it was determined, including clinical and statistical assumptions supporting any sample size calculations                                                                                                                                                                                                                        | 18-19       |
| 2  |                                                                     |     |                                                                                                                                                                                                                                                                                                                                                                                                              |             |
| 3  |                                                                     |     |                                                                                                                                                                                                                                                                                                                                                                                                              |             |
| 4  | Recruitment                                                         | 15  | Strategies for achieving adequate participant enrolment to reach target sample size                                                                                                                                                                                                                                                                                                                          | 21-22       |
| 5  |                                                                     |     |                                                                                                                                                                                                                                                                                                                                                                                                              |             |
| 6  |                                                                     |     |                                                                                                                                                                                                                                                                                                                                                                                                              |             |
| 7  | <b>Methods: Assignment of interventions (for controlled trials)</b> |     |                                                                                                                                                                                                                                                                                                                                                                                                              |             |
| 8  | Allocation:                                                         |     |                                                                                                                                                                                                                                                                                                                                                                                                              |             |
| 9  |                                                                     |     |                                                                                                                                                                                                                                                                                                                                                                                                              |             |
| 10 | Sequence                                                            | 16a | Method of generating the allocation sequence (eg, computer-generated random numbers), and list of any factors for stratification. To reduce predictability of a random sequence, details of any planned restriction (eg, blocking) should be provided in a separate document that is unavailable to those who enrol participants or assign interventions                                                     | 10-11       |
| 11 | generation                                                          |     |                                                                                                                                                                                                                                                                                                                                                                                                              |             |
| 12 |                                                                     |     |                                                                                                                                                                                                                                                                                                                                                                                                              |             |
| 13 |                                                                     |     |                                                                                                                                                                                                                                                                                                                                                                                                              |             |
| 14 |                                                                     |     |                                                                                                                                                                                                                                                                                                                                                                                                              |             |
| 15 |                                                                     |     |                                                                                                                                                                                                                                                                                                                                                                                                              |             |
| 16 | Allocation                                                          | 16b | Mechanism of implementing the allocation sequence (eg, central telephone; sequentially numbered, opaque, sealed envelopes), describing any steps to conceal the sequence until interventions are assigned                                                                                                                                                                                                    | 10-11       |
| 17 | concealment                                                         |     |                                                                                                                                                                                                                                                                                                                                                                                                              |             |
| 18 | mechanism                                                           |     |                                                                                                                                                                                                                                                                                                                                                                                                              |             |
| 19 |                                                                     |     |                                                                                                                                                                                                                                                                                                                                                                                                              |             |
| 20 | Implementation                                                      | 16c | Who will generate the allocation sequence, who will enrol participants, and who will assign participants to interventions                                                                                                                                                                                                                                                                                    | 10-11, 23   |
| 21 |                                                                     |     |                                                                                                                                                                                                                                                                                                                                                                                                              |             |
| 22 |                                                                     |     |                                                                                                                                                                                                                                                                                                                                                                                                              |             |
| 23 |                                                                     |     |                                                                                                                                                                                                                                                                                                                                                                                                              |             |
| 24 | Blinding (masking)                                                  | 17a | Who will be blinded after assignment to interventions (eg, trial participants, care providers, outcome assessors, data analysts), and how                                                                                                                                                                                                                                                                    | 16          |
| 25 |                                                                     |     |                                                                                                                                                                                                                                                                                                                                                                                                              |             |
| 26 |                                                                     |     |                                                                                                                                                                                                                                                                                                                                                                                                              |             |
| 27 |                                                                     | 17b | If blinded, circumstances under which unblinding is permissible, and procedure for revealing a participant's allocated intervention during the trial                                                                                                                                                                                                                                                         | Not blinded |
| 28 |                                                                     |     |                                                                                                                                                                                                                                                                                                                                                                                                              |             |
| 29 |                                                                     |     |                                                                                                                                                                                                                                                                                                                                                                                                              |             |
| 30 |                                                                     |     |                                                                                                                                                                                                                                                                                                                                                                                                              |             |
| 31 | <b>Methods: Data collection, management, and analysis</b>           |     |                                                                                                                                                                                                                                                                                                                                                                                                              |             |
| 32 |                                                                     |     |                                                                                                                                                                                                                                                                                                                                                                                                              |             |
| 33 | Data collection                                                     | 18a | Plans for assessment and collection of outcome, baseline, and other trial data, including any related processes to promote data quality (eg, duplicate measurements, training of assessors) and a description of study instruments (eg, questionnaires, laboratory tests) along with their reliability and validity, if known. Reference to where data collection forms can be found, if not in the protocol | 15-16       |
| 34 | methods                                                             |     |                                                                                                                                                                                                                                                                                                                                                                                                              |             |
| 35 |                                                                     |     |                                                                                                                                                                                                                                                                                                                                                                                                              |             |
| 36 |                                                                     |     |                                                                                                                                                                                                                                                                                                                                                                                                              |             |
| 37 |                                                                     |     |                                                                                                                                                                                                                                                                                                                                                                                                              |             |
| 38 |                                                                     |     |                                                                                                                                                                                                                                                                                                                                                                                                              |             |
| 39 |                                                                     | 18b | Plans to promote participant retention and complete follow-up, including list of any outcome data to be collected for participants who discontinue or deviate from intervention protocols                                                                                                                                                                                                                    | 23-24       |
| 40 |                                                                     |     |                                                                                                                                                                                                                                                                                                                                                                                                              |             |
| 41 |                                                                     |     |                                                                                                                                                                                                                                                                                                                                                                                                              |             |
| 42 |                                                                     |     |                                                                                                                                                                                                                                                                                                                                                                                                              |             |

|    |                                 |     |                                                                                                                                                                                                                                                                                                                                       |       |
|----|---------------------------------|-----|---------------------------------------------------------------------------------------------------------------------------------------------------------------------------------------------------------------------------------------------------------------------------------------------------------------------------------------|-------|
| 1  | Data management                 | 19  | Plans for data entry, coding, security, and storage, including any related processes to promote data quality (eg, double data entry; range checks for data values). Reference to where details of data management procedures can be found, if not in the protocol                                                                     | 21    |
| 2  |                                 |     |                                                                                                                                                                                                                                                                                                                                       |       |
| 3  |                                 |     |                                                                                                                                                                                                                                                                                                                                       |       |
| 4  |                                 |     |                                                                                                                                                                                                                                                                                                                                       |       |
| 5  | Statistical methods             | 20a | Statistical methods for analysing primary and secondary outcomes. Reference to where other details of the statistical analysis plan can be found, if not in the protocol                                                                                                                                                              | 19-21 |
| 6  |                                 |     |                                                                                                                                                                                                                                                                                                                                       |       |
| 7  |                                 |     |                                                                                                                                                                                                                                                                                                                                       |       |
| 8  |                                 | 20b | Methods for any additional analyses (eg, subgroup and adjusted analyses)                                                                                                                                                                                                                                                              | 19-21 |
| 9  |                                 |     |                                                                                                                                                                                                                                                                                                                                       |       |
| 10 |                                 | 20c | Definition of analysis population relating to protocol non-adherence (eg, as randomised analysis), and any statistical methods to handle missing data (eg, multiple imputation)                                                                                                                                                       | 19-21 |
| 11 |                                 |     |                                                                                                                                                                                                                                                                                                                                       |       |
| 12 |                                 |     |                                                                                                                                                                                                                                                                                                                                       |       |
| 13 |                                 |     |                                                                                                                                                                                                                                                                                                                                       |       |
| 14 | <b>Methods: Monitoring</b>      |     |                                                                                                                                                                                                                                                                                                                                       |       |
| 15 |                                 |     |                                                                                                                                                                                                                                                                                                                                       |       |
| 16 | Data monitoring                 | 21a | Composition of data monitoring committee (DMC); summary of its role and reporting structure; statement of whether it is independent from the sponsor and competing interests; and reference to where further details about its charter can be found, if not in the protocol. Alternatively, an explanation of why a DMC is not needed | 22-23 |
| 17 |                                 |     |                                                                                                                                                                                                                                                                                                                                       |       |
| 18 |                                 |     |                                                                                                                                                                                                                                                                                                                                       |       |
| 19 |                                 |     |                                                                                                                                                                                                                                                                                                                                       |       |
| 20 |                                 |     |                                                                                                                                                                                                                                                                                                                                       |       |
| 21 |                                 |     |                                                                                                                                                                                                                                                                                                                                       |       |
| 22 |                                 | 21b | Description of any interim analyses and stopping guidelines, including who will have access to these interim results and make the final decision to terminate the trial                                                                                                                                                               | 19    |
| 23 |                                 |     |                                                                                                                                                                                                                                                                                                                                       |       |
| 24 |                                 |     |                                                                                                                                                                                                                                                                                                                                       |       |
| 25 | Harms                           | 22  | Plans for collecting, assessing, reporting, and managing solicited and spontaneously reported adverse events and other unintended effects of trial interventions or trial conduct                                                                                                                                                     | 14-15 |
| 26 |                                 |     |                                                                                                                                                                                                                                                                                                                                       |       |
| 27 |                                 |     |                                                                                                                                                                                                                                                                                                                                       |       |
| 28 | Auditing                        | 23  | Frequency and procedures for auditing trial conduct, if any, and whether the process will be independent from investigators and the sponsor                                                                                                                                                                                           | 21-22 |
| 29 |                                 |     |                                                                                                                                                                                                                                                                                                                                       |       |
| 30 |                                 |     |                                                                                                                                                                                                                                                                                                                                       |       |
| 31 |                                 |     |                                                                                                                                                                                                                                                                                                                                       |       |
| 32 | <b>Ethics and dissemination</b> |     |                                                                                                                                                                                                                                                                                                                                       |       |
| 33 |                                 |     |                                                                                                                                                                                                                                                                                                                                       |       |
| 34 | Research ethics approval        | 24  | Plans for seeking research ethics committee/institutional review board (REC/IRB) approval                                                                                                                                                                                                                                             | 23    |
| 35 |                                 |     |                                                                                                                                                                                                                                                                                                                                       |       |
| 36 |                                 |     |                                                                                                                                                                                                                                                                                                                                       |       |
| 37 | Protocol amendments             | 25  | Plans for communicating important protocol modifications (eg, changes to eligibility criteria, outcomes, analyses) to relevant parties (eg, investigators, REC/IRBs, trial participants, trial registries, journals, regulators)                                                                                                      | 23    |
| 38 |                                 |     |                                                                                                                                                                                                                                                                                                                                       |       |
| 39 |                                 |     |                                                                                                                                                                                                                                                                                                                                       |       |
| 40 |                                 |     |                                                                                                                                                                                                                                                                                                                                       |       |
| 41 |                                 |     |                                                                                                                                                                                                                                                                                                                                       |       |
| 42 |                                 |     |                                                                                                                                                                                                                                                                                                                                       |       |
| 43 |                                 |     |                                                                                                                                                                                                                                                                                                                                       |       |
| 44 |                                 |     |                                                                                                                                                                                                                                                                                                                                       |       |
| 45 |                                 |     |                                                                                                                                                                                                                                                                                                                                       |       |
| 46 |                                 |     |                                                                                                                                                                                                                                                                                                                                       |       |

|    |                               |     |                                                                                                                                                                                                                                                                                     |          |
|----|-------------------------------|-----|-------------------------------------------------------------------------------------------------------------------------------------------------------------------------------------------------------------------------------------------------------------------------------------|----------|
| 1  | Consent or assent             | 26a | Who will obtain informed consent or assent from potential trial participants or authorised surrogates, and how (see Item 32)                                                                                                                                                        | 23       |
| 2  |                               |     |                                                                                                                                                                                                                                                                                     |          |
| 3  |                               |     |                                                                                                                                                                                                                                                                                     |          |
| 4  |                               | 26b | Additional consent provisions for collection and use of participant data and biological specimens in ancillary studies, if applicable                                                                                                                                               | 23       |
| 5  |                               |     |                                                                                                                                                                                                                                                                                     |          |
| 6  |                               |     |                                                                                                                                                                                                                                                                                     |          |
| 7  | Confidentiality               | 27  | How personal information about potential and enrolled participants will be collected, shared, and maintained in order to protect confidentiality before, during, and after the trial                                                                                                | 24       |
| 8  |                               |     |                                                                                                                                                                                                                                                                                     |          |
| 9  |                               |     |                                                                                                                                                                                                                                                                                     |          |
| 10 | Declaration of interests      | 28  | Financial and other competing interests for principal investigators for the overall trial and each study site                                                                                                                                                                       | 25       |
| 11 |                               |     |                                                                                                                                                                                                                                                                                     |          |
| 12 |                               |     |                                                                                                                                                                                                                                                                                     |          |
| 13 | Access to data                | 29  | Statement of who will have access to the final trial dataset, and disclosure of contractual agreements that limit such access for investigators                                                                                                                                     | 24       |
| 14 |                               |     |                                                                                                                                                                                                                                                                                     |          |
| 15 |                               |     |                                                                                                                                                                                                                                                                                     |          |
| 16 | Ancillary and post-trial care | 30  | Provisions, if any, for ancillary and post-trial care, and for compensation to those who suffer harm from trial participation                                                                                                                                                       | 24       |
| 17 |                               |     |                                                                                                                                                                                                                                                                                     |          |
| 18 |                               |     |                                                                                                                                                                                                                                                                                     |          |
| 19 |                               |     |                                                                                                                                                                                                                                                                                     |          |
| 20 | Dissemination policy          | 31a | Plans for investigators and sponsor to communicate trial results to participants, healthcare professionals, the public, and other relevant groups (eg, via publication, reporting in results databases, or other data sharing arrangements), including any publication restrictions | 24       |
| 21 |                               |     |                                                                                                                                                                                                                                                                                     |          |
| 22 |                               |     |                                                                                                                                                                                                                                                                                     |          |
| 23 |                               |     |                                                                                                                                                                                                                                                                                     |          |
| 24 |                               | 31b | Authorship eligibility guidelines and any intended use of professional writers                                                                                                                                                                                                      | 24       |
| 25 |                               |     |                                                                                                                                                                                                                                                                                     |          |
| 26 |                               | 31c | Plans, if any, for granting public access to the full protocol, participant-level dataset, and statistical code                                                                                                                                                                     | 24       |
| 27 |                               |     |                                                                                                                                                                                                                                                                                     |          |
| 28 |                               |     |                                                                                                                                                                                                                                                                                     |          |
| 29 | <b>Appendices</b>             |     |                                                                                                                                                                                                                                                                                     |          |
| 30 |                               |     |                                                                                                                                                                                                                                                                                     |          |
| 31 | Informed consent materials    | 32  | Model consent form and other related documentation given to participants and authorised surrogates                                                                                                                                                                                  | Suppl S4 |
| 32 |                               |     |                                                                                                                                                                                                                                                                                     |          |
| 33 |                               |     |                                                                                                                                                                                                                                                                                     |          |
| 34 | Biological specimens          | 33  | Plans for collection, laboratory evaluation, and storage of biological specimens for genetic or molecular analysis in the current trial and for future use in ancillary studies, if applicable                                                                                      | 15-16    |
| 35 |                               |     |                                                                                                                                                                                                                                                                                     |          |
| 36 |                               |     |                                                                                                                                                                                                                                                                                     |          |

\*It is strongly recommended that this checklist be read in conjunction with the SPIRIT 2013 Explanation & Elaboration for important clarification on the items. Amendments to the protocol should be tracked and dated. The SPIRIT checklist is copyrighted by the SPIRIT Group under the Creative Commons [“Attribution-NonCommercial-NoDerivs 3.0 Unported”](https://creativecommons.org/licenses/by-nc-nd/3.0/) license.



## Online supplementary file S2 OVATION-65 team members

### Executive Committee

Neill KJ Adhikari (PI, co-chair), François Lamontagne (PI, co-chair), M. Elizabeth Wilcox, (PI) Marie-Claude Battista (co-I), Marie-Hélène Masse (PL)

### Data Safety Monitoring Committee

Andreas Laupacis (chair), Lauren Griffith, Scott Halpern

### Coordinating Centre Personnel

Marie-Claude Battista, Marie-Hélène Masse, Louise Robert-Petit, Marie-Ève Thibault

### Contributors to ancillary studies

François-Michel Boisvert, Lee Hwa Tai, Jean-Luc Parent, Xavier Roucou

### Participating Clinical Site Personnel

#### *CIUSSS de l'Estrie – Centre Hospitalier Universitaire de Sherbrooke*

François Lamontagne (PI), Frédérick D'Aragnon (Co-I), Marc-André Leclair (Co-I), Michaël Mayette (Co-I), Yannick Poulin (Co-I), Hector Quiroz-Martinez (Co-I), Charles St-Arnaud (Co-I), Éline Carbonneau (RC), Line Côté (RC), Marilène Ladouceur (RC), Joannie Marchand (RA), Marie-Hélène Masse (RC), Noémie Turcotte (RA)

#### *Centre Hospitalier de l'Université de Montréal*

Michaël Chassé (PI), Martine Lebrasseur (RC), Fatna Benettaib (RC), Dounia Boumahni (RC), Marie-Ève Cantin (RA), Ali Ghamraoui (RC), Maya Salame (RC)

#### *The Ottawa Hospital (General Campus and Civic Campus)*

Andrew Seely (PI), Irene Watpool (RC), Rebecca Porteous (RC), Sydney Miezeitis (RA)

#### *Sunnybrook Health Sciences Centre*

Neill KJ Adhikari (PI), Andre Carlos Amaral (Co-I), Brian Cuthbertson (Co-I), Robert Fowler (Co-I), Damon Scales (Co-I), Nicole Marinoff (RC), Navjot Kaur (RC), Wael Mohammed (RC)

#### *Centre Hospitalier Universitaire de Québec-Université Laval*

François Lauzier (PI), Alexis Turgeon (Co-I), Charles Francoeur (Co-I), Guillaume Leblanc (Co-I), David Bellemare (RC), Olivier Costerousse (RC), Stéphanie Grenier (RA), Gabrielle Guilbault (RA), Marjorie Daigle (RA), Ève Cloutier (RA), Isabelle St-Hilaire (RA).

#### *Mount Sinai Hospital*

Sangeeta Mehta (PI), Laveena Munshi (Co-I), Sumesh Shah (RC)

#### *Toronto Western Hospital*

Elizabeth Wilcox (PI), Jeffrey Singh (Co-I), Karolina Walczak (RC)

*Juravinski Hospital* (activation in progress and no patients enrolled at the time of manuscript submission)

Bram Rochweg (PI), Tina Millen (RC)

### Abbreviations:

Co-I – co-investigator; PI – principal investigator; PL – project leader; RA – research assistant; RC – research coordinator

### Online supplementary file S3 OVATION-65 ancillary studies

| Study title                                                                                                                                                | Investigators                                                                                | Primary objective                                                                                                                                                                                                                                                                                   | Secondary objective                                                                                                                                                                                                                                                                                         | Funding                                            |
|------------------------------------------------------------------------------------------------------------------------------------------------------------|----------------------------------------------------------------------------------------------|-----------------------------------------------------------------------------------------------------------------------------------------------------------------------------------------------------------------------------------------------------------------------------------------------------|-------------------------------------------------------------------------------------------------------------------------------------------------------------------------------------------------------------------------------------------------------------------------------------------------------------|----------------------------------------------------|
| Measuring baseline ascorbic acid levels in the OVATION-65 trial                                                                                            | MC Battista<br>NK Adhikari<br>F Lamontagne                                                   | Measure the associations between baseline level of plasma ascorbic acid and peak levels of biomarkers of organ injury* (measured at day 1 [baseline], day 3, and 7) in the permissive hypotension and usual care groups.<br><br>Organ injury biomarkers are specified in Table 1 of the manuscript. | Measure the association between baseline ascorbic acid and<br><br>1) total dose of vasopressors required to maintain blood pressure;<br><br>2) biomarkers of inflammation* (IL-1 $\beta$ , TNF- $\alpha$ , C-reactive protein)<br><br>3) biomarkers of endothelial injury* (thrombomodulin, angiopoietin-2) | Lotte and John Hecht Memorial Foundation           |
| Urinary biomarkers of renal injury in the OVATION-65 trial: a Nested analysis of the urinary proteome                                                      | FM Boisvert<br>MC Battista<br>NK Adhikari<br>F Lamontagne                                    | Identify and quantify, using a discovery proteomic approach, new peptides and proteins and their pattern of expression between baseline, day 3 and day 7 in the urine of patients in permissive hypotension and usual care groups.                                                                  | Measure the association between protein clusters and renal function<br><br>Validate the predictive value of biomarkers of renal injury*: TIMP2, NGAL, FABPL, CYTC, IGFBP7                                                                                                                                   | Université de Sherbrooke/<br>Merck Sharp and Dohme |
| Effects of catecholamine therapy on the immune system: unsuspected consequences of routine medical interventions and opportunities for individualized care | FM Boisvert<br>LH Tai<br>JL Parent<br>X Roucou<br>MC Battista<br>NK Adhikari<br>F Lamontagne | Compare PBMC immune response (Th1/Th2 profiles), adrenergic receptor activity, and proteomic signature between baseline and day 7 in the permissive hypotension and usual care groups                                                                                                               |                                                                                                                                                                                                                                                                                                             | Université de Sherbrooke/<br>Merck Sharp and Dohme |

Abbreviations: CYTC, cytochrome C; FABPL, fatty acid-binding protein, liver-type; IGFBP7, insulin-like growth factor-binding protein 7; IL-1 $\beta$ , interleukin-1 $\beta$ ; NGAL, neutrophil gelatinase-associated lipocalin; PBMC, peripheral blood mononuclear cell; TIMP2, tissue inhibitor of metalloproteinases 2; TNF- $\alpha$ , tumour necrosis factor- $\alpha$

\*All biomarkers are assessed at baseline (day 1) and at days 3 and 7.

## RESEARCH INFORMATION AND CONSENT FORM

**Study Title:** The OVATION-65- Impact of permissive hypotension on end-organ damage in the elderly

**Study Number and Date:** MP-31-2018-1789

**Funding Agencies:** Centre de recherche du CHUS  
Université de Sherbrooke

**Principal Investigator:** Dr. François Lamontagne, Intensivist

**Co-Investigators:** Dr. Frédérick D'Aragon, Intensivist,  
Dr. Charles St-Arnaud, Intensivist  
Dr. Michaël Mayette, Intensivist,

### FOR INFORMATION

**Monday through Friday, from 8 am and 4 pm, you can reach:**

|                                          |                                |
|------------------------------------------|--------------------------------|
| Dr. François Lamontagne, Intensivist     | Tel.: 819-346-1110, ext. 74974 |
| Élaine Carbonneau, Research Coordinator  | Tel.: 819-346-1110, ext. 16208 |
| Marie-Hélène Masse, Research Coordinator | Tel.: 819-346-1110, ext. 14173 |
| Marilène Ladouceur, Research Assistant   | Tel.: 819-346-1110, ext. 14169 |

or dial "0" and ask the operator to call them on pager # 7125.

We are seeking your participation (or that of your family member) in a research study because you (or your family member) have been admitted to an intensive care unit and will need medication administered into your veins to raise your blood pressure. However, before you agree to participate, please take the time to read, understand and carefully consider the following information. If you agree to take part in this research study, you will be asked to sign the consent form at the end of this document and we will give you a signed copy for your own records.

This Information and Consent Form explains the goals, procedures, risks and inconveniences, and benefits of the study as well as providing the names of the people to reach if needed. This document may contain information or words that you do not understand. Please ask the study investigator or members of the study staff to answer your questions and explain any word or information you do not understand.

### NATURE AND GOALS OF THE RESEARCH STUDY

This study aims to determine whether the target blood pressure used to adjust the dosage of the blood-pressure-increasing medication changes the evolution of participants treated in the Intensive Care Unit (ICU). Vasopressors are drugs that are given intravenously to increase the blood pressure of patients with diseases causing dangerous pressure drops that can be harmful to the organs of the body. When a doctor

1 prescribes a vasopressor, he asks that the dose be adjusted to achieve a specific blood  
2 pressure. However, although vasopressors have been used for nearly a century, we still  
3 do not know whether it is preferable to try and normalize the blood pressure of our  
4 patients (which requires high doses of vasopressors) or tolerate a lower pressure (which  
5 is not normal, but requires smaller doses of drugs). The current practice is quite  
6 variable, some doctors preferring to increase the blood pressure, others preferring to  
7 restrict doses of these powerful drugs and tolerate a lower blood pressure  
8 (hypotension).  
9

10  
11  
12 The goal of this study is to determine if tolerating a lower mean blood pressure  
13 (permissive hypotension) vs. usual blood pressure targets in hypotensive patients over  
14 65 years of age can reduce the risk of harm associated with more aggressive  
15 vasopressor therapy. The specific objectives are to evaluate: the effect of permissive  
16 hypotension on your health status after 6 months, the effects on markers of organ  
17 injury, including the heart, brain, kidneys, liver, intestine, and skeletal muscles as well  
18 as the effects on your immune system. We wish to recruit around 100 participants at the  
19 *CIUSSS de l'Estrie - CHUS* to be among the 200 participants needed for this study that  
20 will be carried out in several hospitals.  
21

22  
23 Your physician has determined that you are eligible to participate in our study and you  
24 have been selected as a participant because you are being (or will soon be) treated in  
25 the ICU and because you were prescribed vasopressor drugs.  
26

## 27 **RESEARCH STUDY PROCEDURES**

28 If you agree to participate in this study, you (or your family member) will be assigned to  
29 one of the following two groups: The first group includes participants who are being  
30 given vasopressors for an average blood pressure of 60-65 mmHg (limiting the amount  
31 of vasopressors given); the second group includes participants who are receiving  
32 vasopressors following usual care. Your assignment to one of these two groups was  
33 determined randomly by a computer that will not retain information about you. The odds  
34 of being assigned to either group were 50% (1 in 2 chances or half-and-half). The  
35 treating team will be aware of which group you have been assigned to.  
36  
37

38 As a study participant, you will receive vasopressors to maintain your average blood  
39 pressure at the level of your assigned group. These pressure targets will remain the  
40 same throughout your treatment with this type of medication (vasopressors) until you  
41 are discharged from hospital or up to 28 days from the beginning of your participation,  
42 whichever event comes first. Also, on days 1, 3 and 7 of participation (or when you are  
43 discharged from the intensive care unit), your nurse will collect 30 ml of blood (6  
44 teaspoons) as well as urine samples while taking the blood samples required for your  
45 medical follow-up. We will collect a little more volume than what is needed in order to  
46 compensate for unexpected losses that may arise during laboratory testing. These  
47 samples will enable us to measure certain biomarkers in your blood and in your urine  
48 that help assess the function of your heart, kidneys, muscles, brain and liver as well as  
49 your immune system. These biomarkers are already known to be useful in clinical  
50 studies and are not genetic biomarkers. During your hospital stay, we will monitor your  
51 progress to see if your organs are functioning well, if you develop other health problems  
52 and how long you will stay in the ICU and hospital. Your medical chart will be reviewed,  
53 by the investigator and the research team as long as you remain in the study. Blood test  
54 results and procedures present in your medical record will be collected for the study.  
55  
56  
57  
58  
59

1  
2 After you are discharged from the hospital, you will be contacted by phone 6 monthss  
3 after the start of your participation in the study. Your contact information will be provided  
4 to the coordinating research team.  
5

### 6 7 **FUTURE ANALYSES**

8 Once the biomarker analyses have been performed as part of this study, it is possible  
9 that part of your samples may be unused. We wish to use the remainder of your  
10 samples (blood and urine) in order to answer additional questions concerning the  
11 impact of vasopressors on blood pressure targets that may arise in future. For example,  
12 we could measure a new, as yet undefined, biomarker. Only the remainder of your  
13 samples will be used and no other additional sample will be collected. At the end of the  
14 study, if some of the samples remain unused, they will be destroyed unless you agree  
15 to biobanking. A separate consent form will be presented for biobanking.  
16  
17

### 18 19 **RISKS ASSOCIATED WITH PARTICIPATION IN THIS RESEARCH STUDY**

20 Vasopressors used in this study and that you have received or may still be receiving,  
21 are approved in Canada and commonly used in the ICUs of all hospitals. The blood  
22 pressure targets we aim for in this study are also part of current medical practices.

23 Since your health condition required treatment with vasopressors, and continues to  
24 require treatment at this time, to our knowledge, you are exposed to the same risks,  
25 whether or not you participate in this study.  
26  
27

### 28 29 **INCONVENIENCES ASSOCIATED WITH PARTICIPATION IN THE STUDY**

30 Other than the risks described above, you (or your family member) shouldn't experience  
31 any other inconveniences.  
32

### 33 34 **BENEFITS ASSOCIATED WITH YOUR PARTICIPATION IN THE RESEARCH STUDY**

35 You (or your family member) will not personally benefit from your participation in this  
36 research study. However, the findings from this study may help increase our knowledge  
37 of pressure targets, vasopressors and biomarkers. The information obtained through  
38 this study could be useful to other patients in the future.  
39

### 40 41 **ALTERNATIVES TO YOUR PARTICIPATION IN THIS RESEARCH STUDY**

42 You (or to your family member) do not have to participate in this research study to be  
43 treated for your disease.  
44

### 45 46 **VOLUNTARY PARTICIPATION AND THE RIGHT TO WITHDRAW**

47 Your participation in this research study is voluntary. Therefore, you may refuse to  
48 participate. You can also withdraw from the study at any time, without providing a  
49 reason, by informing the study investigator or one of his assistants.

50 Your decision not to participate in the study or to withdraw from it, will have no impact  
51 on the quality of care and services you (or your family member) are entitled to or on  
52 your relationship with the investigator and other stakeholders.

53 The study investigator, the funding agency or the Research Ethics Board may put an  
54 end your participation in the study without your consent. This may happen if new  
55 scientific developments show that participation is no longer in your interest; if the study  
56 investigator believes it is in your best interest; or if there are administrative reasons to  
57 terminate the study.  
58

1  
2 If you withdraw or are withdrawn from the study, the information and material already  
3 collected during the course of the study will be stored, analyzed or used to ensure the  
4 integrity of the study.  
5

6 Any new study findings that could influence your decision to remain in the research  
7 study will be shared with you as soon as possible.  
8

### 9 **CONFIDENTIALITY**

10 While you take part in this research study, the study investigator and study staff will  
11 collect and record information about you in a study file. Only the information needed to  
12 meet the scientific goals of the study will be collected.  
13

14 This information could include data taken from your medical record concerning your  
15 past and present medical history, your lifestyle and the test results, exams and  
16 procedures you will undergo during the study.  
17

18 All the information collected during the study will remain strictly confidential to the extent  
19 provided by law. To protect your identity and privacy, you will be identified by an  
20 alphanumeric code. The key linking your identity and your research file will be kept in a  
21 safe place by the study investigator.  
22

23 To ensure your safety, a mention of your participation in this research project will be  
24 included in your medical file. Therefore, any person or company to whom you will give  
25 access to your medical file will have access to this information.  
26

27 Your full name and your phone number will be transmitted to a qualified person of the  
28 coordinating center of the study in order to allow this person to contact you in 6 months  
29 by phone. This personal information will allow a direct identification. This information will  
30 be kept in security and confidentiality will be preserved by the qualified person and  
31 destroyed at the end of the follow-up.  
32

33 Study results will be stored by the study investigator for 25 years.  
34

35 Study results may be published in medical journals or discussed at scientific meetings,  
36 but it will be impossible to identify participants.  
37

38 For monitoring and control purposes, your study file and medical records may be  
39 examined by a representative of the Research Ethics Board or of the institution or by a  
40 person mandated by a regulatory authority. All of these individuals and organizations  
41 adhere to confidentiality policies.  
42

43 You have the right to consult your study file at any time in order to verify the information  
44 gathered and to have it corrected, if necessary, for as long as this information is  
45 available to the study investigator or the institution. However, some of this information  
46 may be made available to you only once the study has ended, in order to protect the  
47 scientific integrity of the study.  
48  
49

### 50 **COMPENSATION**

51 You (or your family member) will not receive any compensation for expenses and  
52 inconveniences incurred due to your participation in this research study.  
53  
54  
55  
56  
57  
58  
59  
60

**SHOULD YOU SUFFER ANY HARM**

Should you suffer any harm due to your participation in this research study, you will be provided with all the necessary care and services, at no cost to you.

By agreeing to take part in this study, you are not waiving any of your legal rights nor discharging the study investigators, the sponsor or the institution where this research study is being conducted of their civil liability and professional responsibilities.

**FUNDING OF THE RESEARCH STUDY**

The study investigator has received funding from the grant agency to carry out this study.

**CONTACT PERSONS**

If you have any questions regarding your participation in this research study, please refer to the box on page 1.

If you have any questions regarding your rights as a participant in this study, if you have any comments or you wish to file a complaint, you may contact the *Bureau des plaintes et de la qualité des services of the CIUSSS de l'Estrie-CHUS* at the following number: 1-866-917-7903.

**MONITORING OF ETHICAL ASPECTS OF THE STUDY**

The *Comité d'éthique de la recherche du CIUSSS de l'Estrie - CHUS* has approved this study and is responsible for monitoring it at all participating institutions throughout Québec's health and social service network.

If you wish to reach a member of the Research Ethics Board (REB), please contact the *Service de soutien à l'éthique de la recherche du CIUSSS de l'Estrie - CHUS* at the following number: 819-346-1110, ext. 12856.

---

The OVATION-65- Impact of permissive hypotension on end-organ damage in the elderly

---

**CONSENT**

I declare that I have read this Information and Consent Form. I declare that the research study has been explained to me, that my questions were answered to my satisfaction and that I was given sufficient time for consideration and to make a decision. Upon reflection, I agree to participate in this research study under the conditions stated therein.

I agree that the remainder of the samples may be used for additional analyses that may arise during the study (future analyses).  YES  NO

---

|                                              |                          |      |
|----------------------------------------------|--------------------------|------|
| Name of participant<br><i>(please print)</i> | Signature of participant | Date |
|----------------------------------------------|--------------------------|------|

I have explained the research study and this Information and Consent Form and I have answered all of his/her questions.

---

|                                                              |                                          |      |
|--------------------------------------------------------------|------------------------------------------|------|
| Name of person<br>obtaining consent<br><i>(please print)</i> | Signature of person<br>obtaining consent | Date |
|--------------------------------------------------------------|------------------------------------------|------|



**CONSENT FROM LEGAL REPRESENTATIVE (SUDDEN INCAPACITY)**

Because Mr./Mrs. \_\_\_\_\_ has suddenly become incapable of giving consent for the hereinafter mentioned reason, the Civil Code of Québec allows you to give consent for him/her as his/her \_\_\_\_\_ (indicate your relationship with the participant).

As soon as Mr./Mrs. \_\_\_\_\_ has sufficiently recovered, he/she will be asked to sign his/her own consent form to indicate whether he/she wants to continue taking part in this study.

**REASON FOR THE PARTICIPANT NOT BEING ABLE TO GIVE CONSENT**

By signing this page, I confirm that I have read the information in this Consent Form. I acknowledge that the study has been explained to me, that all of my questions have been answered and that I was given enough time to make a decision. I voluntarily give my consent so that Mr./Mrs. \_\_\_\_\_ can participate in this study.

I also agree that the remainder of the samples may be used for additional analyses that may arise during the study (future analyses).  YES  NO

| Name of legal representative<br>(please print) | Signature of legal representative | Date |
|------------------------------------------------|-----------------------------------|------|
|------------------------------------------------|-----------------------------------|------|

I have explained the research study and this Consent Form to the participant's legal representative. I have answered all of his/her questions.

| Name of person<br>obtaining consent<br>(please print) | Signature of person<br>obtaining consent | Date |
|-------------------------------------------------------|------------------------------------------|------|
|-------------------------------------------------------|------------------------------------------|------|

**CONSENT FROM THE LEGAL REPRESENTATIVE OR CAREGIVER SUPPORTING THE PARTICIPATION OF THE PERMANENTLY INCAPABLE PARTICIPANT (PERMANENT INCAPACITY)**

I declare that I have read this Information and Consent Form. I declare that the research study has been explained to me, that my questions were answered to my satisfaction and that I was given sufficient time for consideration and to make a decision.

I agree that \_\_\_\_\_ can participate in this research study under the conditions stated therein. I will receive a signed and dated copy of this Information and Consent Form.

I also agree that the remainder of the samples may be used for additional analyses that may arise during the study (future analyses).  YES  NO

If the incapacitated participant is represented:

\_\_\_\_\_  
Name and signature of the legal representative (representative, curator or mandatary) Date

If the incapacitated participant is not represented by a legal representative:

\_\_\_\_\_  
Name and signature of the spouse, failing which, name of next-of-kin or name of a significant person Date

I have explained the research study and this Consent Form to the participant's legal representative. I have answered all his/her questions.

\_\_\_\_\_  
Name of person obtaining consent (please print) Signature of person obtaining consent Date

**PHONE CONSENT**

(For the participant who is suddenly or permanently incapacitated)

Because Mr./Mrs. \_\_\_\_\_ is incapable of giving consent for the hereinafter mentioned reason,

REASON FOR THE PARTICIPANT NOT BEING ABLE TO GIVE CONSENT

I have explained the research study and this Consent Form to the participant's legal representative. I have answered all his/her questions.

The representative, Mr./Mrs. \_\_\_\_\_  
 Name of the legal representative (representative, curator or mandatary)  
 Name of the spouse or next-of-kin or  
 Name of the significant person

has given consent by phone on \_\_\_\_\_ at \_\_\_\_\_  
 Date Hour

The representative also agrees that the remainder of the samples may be used for additional analyses that may arise during the study (future analyses).  YES  NO

Name of person  
obtaining consent  
(please print)

Signature of person  
obtaining consent

Date

## APPENDIX 1: GENETIC PHASE

**(PLEASE NOTE: This part of the consent should not appear in the patient's medical file)**

We invite you to participate in the genetic component of this study. This phase is optional. You may refuse this proposal and still participate in the main phase of the project.

Please note that all sections of the main consent form apply to this appendix as well.

Genetics focuses on cells in the human body that contain a type of molecule called deoxyribonucleic acid commonly referred to as "DNA". Your DNA is contained in the inherited genes that control your entire body's growth, development and functions. For instance, some genes determine the colour of your eyes or hair. DNA presents a wide array of differences or variations from one person to another. These variations may affect the risk of contracting a disease (or not) or the way individuals respond differently to a drug. The OVATION-65 project also includes a genetic sub-study focusing on the analysis of certain genes (genetics) and certain phenomena present in your environment that modify your DNA (epigenetics). These tests can be performed on the cells in your blood.

The markers of the heart, brain, kidneys, liver, intestine and skeletal muscles that we are interested in measuring as part of the OVATION-65 study as well as the molecules (receptors) that enable the vasopressors to act (beta-adrenergic receptors) on the cells of different organs are determined in part by genes. Thus, in order to better understand how to reduce organ damage related to medication (vasopressors) received during intensive care unit admissions, we propose to study the DNA as well as the variations around this DNA (called epigenetic variations) of patients included in OVATION-65. Our goal is to demonstrate that modifications in the DNA of studied markers are associated with the levels of these same blood or urine markers, which inform us on the function/involvement of the targeted organ.

If you agree to participate, we will use a portion of the samples already collected as part of the main project and an additional sample (approximately 2 teaspoons) to conduct our genetic analyses.

### FUTURE ANALYSIS

Once the genetic analyses have been conducted, it is possible that a portion of the samples will remain unused. We would like to use the remainder of your samples to answer additional research questions that might arise during the course of the study. Only the remainder of your samples will be used and no other additional samples will be taken. At the end of the study, if some samples remain unused, they will be destroyed unless you agree to biobanking. Another consent form will be presented for biobanking.

## **SOCIO-ECONOMIC RISKS ASSOCIATED WITH PARTICIPATION IN THIS PHASE OF THE STUDY**

One of the risks associated with genetic analyses is related to the disclosure of results or of your participation to third parties. Protection against genetic discrimination is not currently well defined in Canadian and Québec legislation. Thus, we cannot fully guarantee that your participation in a genetics research project will not have an impact on your chances of getting certain jobs, or of getting insurance coverage (life insurance, disability or health) for you or for members of your family.

However, as researchers, we are committed not to disclose information related to genetic results to any third party. Your results will not be made available to third parties such as an employer, a government agency, an insurer or an educational institution. This also applies to your spouse, other members of your family and your doctor. Furthermore, rest assured that no data related to any genetic results will be included in your hospital record.

## **VOLUNTARY PARTICIPATION AND THE RIGHT TO WITHDRAW FROM THE GENETIC PHASE OF THE PROJECT**

Your participation in the genetic phase of the project is voluntary. Therefore, you may refuse to participate. You may also withdraw your consent from the genetic phase of this research project at any time. Just call the ICU research team at 346-1110 ext. 14171.

Your decision to refuse to participate in this sub-study of the project will have no impact on the quality of the care that will be provided to you or on your relationship with the healthcare team.

If you decide to terminate your participation in the genetic sub-study after providing a sample, you must notify the research team that will then destroy your sample. If your sample has already been tested and the results are already included in an analysis or publication, it will not be possible to remove this information. However, the rest of your sample will be destroyed and no further analysis will be done on your sample.

## **CONFIDENTIALITY**

### Identification:

In order to protect your identity, your samples will be identified by a unique code. Your name and your file number will not appear on the samples. The study investigator will keep a list of patients with the code numbers to identify them. This list is kept under lock and key in the research nurse's office and will not be disclosed under any circumstances.

### Storage and destruction of samples:

Your samples will be kept in the principal investigator's freezers until the end of the study, unless you agree to biobanking. Another consent form will be presented to this end. The principal investigator is responsible for the destruction of samples.

## **COMMUNICATION OF RESULTS**

Your participation and the results of the genetic analysis conducted on your samples will not be disclosed to you or to your doctor.

**MARKETING POSSIBILITIES / WAIVER**

Your participation in the genetic phase of this project could lead to the creation of commercial or other products that could potentially be protected by patents or other intellectual property rights. However, you will not receive any financial benefits.

**CONSENT (GENETIC SUB-STUDY)**

I declare that I have read this Appendix (genetic sub-study). I acknowledge that this sub-study of the project was explained to me, that all my questions were answered and that I was given the necessary time to make a decision.

I freely and willingly consent to participate in the **genetic sub-study** of this project:

I also accept that the remainder of my samples may be used for **additional genetic analyses** that may arise during the course of this study (future analysis):

YES       NO

---

|                                            |                          |      |
|--------------------------------------------|--------------------------|------|
| Name of participant name<br>(please print) | Signature of participant | Date |
|--------------------------------------------|--------------------------|------|

I have explained the genetic sub-study and this Consent Form to the participant, and I answered all his/her questions.

---

|                                                       |                                          |      |
|-------------------------------------------------------|------------------------------------------|------|
| Name of person<br>obtaining consent<br>(please print) | Signature of person<br>obtaining consent | Date |
|-------------------------------------------------------|------------------------------------------|------|

1  
2  
3 **CONSENT (GENETIC SUB-STUDY)**  
4 **FROM THE LEGAL REPRESENTATIVE (SUDDEN INCAPACITY)**  
5

6 Because Mr./Mrs. \_\_\_\_\_ has suddenly become incapable of giving  
7 consent for the hereinafter mentioned reason, the Civil Code of Québec allows you to  
8 give consent for him/her as his/her \_\_\_\_\_ (indicate your  
9 relationship with the participant) to participate in the **genetic sub-study** of the project.  
10

11 As soon as Mr./Mrs. \_\_\_\_\_ has sufficiently recovered, he/she will  
12 be asked to sign his/her own consent form to indicate whether he/she wants to continue  
13 taking part in this sub-study of the study.  
14  
15

16 REASON FOR THE PARTICIPANT NOT BEING ABLE TO GIVE CONSENT  
17  
18  
19

20  
21 By signing this page, I confirm that I have read the information in this Consent Form. I  
22 acknowledge that the **genetic sub-study** of the project has been explained to me, that  
23 all of my questions have been answered and that I was given enough time to make a  
24 decision.  
25

26  
27 I voluntarily give my consent so that Mr./Mrs. \_\_\_\_\_ can participate in  
28 the genetic sub study.  
29

30 I also agree that the remainder of the samples may be used for **additional genetic**  
31 **analyses** that may arise during the study (future analyses).  YES  NO  
32  
33  
34  
35

36 \_\_\_\_\_  
37 Name of legal representative      Signature of legal representative      Date  
38 *(please print)*

39  
40  
41 I have explained all relevant aspects of the genetic sub-study of this project to the  
42 participant's legal representative and I have answered all his/her questions.  
43  
44

45 \_\_\_\_\_  
46 Name of person      Signature of person      Date  
47 obtaining consent      obtaining consent  
48 *(please print)*  
49  
50  
51  
52  
53  
54  
55  
56  
57  
58  
59

1  
2  
3 **CONSENT (GENETIC SUB-STUDY)**  
4 **FROM LEGAL REPRESENTATIVE OR CAREGIVER (PERMANENT INCAPACITY)**  
5

6  
7 I confirm that I have read the information in this Consent Form. I acknowledge that the  
8 genetic sub-study of the project has been explained to me, that all of my questions have  
9 been answered and that I was given enough time to make a decision.  
10

11  
12 I agree that \_\_\_\_\_ can participate in this **genetic sub study** under the  
13 conditions stated therein. I will receive a signed and dated copy of this Information and  
14 Consent Form.  
15

16  
17 I also agree that the remainder of the samples may be used for **additional genetic**  
18 **analyses** that may arise during the study (future analyses).  YES  NO  
19

20  
21 If the participant is represented:  
22

23  
24  
25 \_\_\_\_\_  
26 Name and signature of the legal representative Date  
27 (representative, curator or mandatary)  
28

29  
30 If the incapacitated participant is not represented by a legal representative:  
31

32  
33  
34 \_\_\_\_\_  
35 Name and signature of the spouse, Date  
36 failing which, name of the next-of-kin or  
37 name of the significant person  
38

39  
40  
41 I have explained the research study and this Consent Form to the participant's legal  
42 representative. I have answered all his/her questions.  
43

44  
45  
46 \_\_\_\_\_  
47 Name of person Signature of person Date  
48 obtaining consent obtaining consent  
49 (please print)  
50



**PHONE CONSENT (GENETIC SUB-STUDY)**

(For the participant who is suddenly or permanently incapacitated)

Because Mr./Mrs. \_\_\_\_\_ is incapable of giving consent for the hereinafter mentioned reason.

REASON FOR THE PARTICIPANT NOT BEING ABLE TO GIVE CONSENT

\_\_\_\_\_

I have explained the genetic sub study and this Consent Form to the legal representative using the phone script and I have answered all his/her questions.

The representative, Mr./Mrs. \_\_\_\_\_

Name of the legal representative (representative, curator or mandatary)  
Name of the spouse or of the next-of-kin or  
Name of the significant person

has given consent by phone on \_\_\_\_\_ at \_\_\_\_\_

Date

Time

The representative also agrees that the remainder of the samples may be used for **additional genetic analyses** that might arise during the study (future analyses).

**YES**  **NO**

|                                                              |                                          |               |
|--------------------------------------------------------------|------------------------------------------|---------------|
| Name of person<br>obtaining consent<br><i>(please print)</i> | Signature of person<br>obtaining consent | Date and time |
|--------------------------------------------------------------|------------------------------------------|---------------|
