# Supplementary material for: Optimal VAsopressor TitraTION in patients 65 years and older (OVATION-65): protocol and statistical analysis plan for a randomised clinical trial
Source: PubMed Central journal article supplement — BMJ Open. 2020 Nov 14;10(11):e037947. doi: 10.1136/bmjopen-2020-037947 (PMC7668371; doi:10.1136/bmjopen-2020-037947), 2020-11-14
Supplement: bmjopen-2020-037947supp002.pdf [file bmjopen-2020-037947supp002.pdf]

**Online supplementary file S2 OVATION-65 team members****Executive Committee**

Neill KJ Adhikari (PI, co-chair), François Lamontagne (PI, co-chair), M. Elizabeth Wilcox, (PI) Marie-Claude Battista (co-I), Marie-Hélène Masse (PL)

**Data Safety Monitoring Committee**

Andreas Laupacis (chair), Lauren Griffith, Scott Halpern

**Coordinating Centre Personnel**

Marie-Claude Battista, Marie-Hélène Masse, Louise Robert-Petit, Marie-Ève Thibault

**Contributors to ancillary studies**

François-Michel Boisvert, Lee Hwa Tai, Jean-Luc Parent, Xavier Roucou

**Participating Clinical Site Personnel***CIUSSS de l'Estrie – Centre Hospitalier Universitaire de Sherbrooke*

François Lamontagne (PI), Frédéric D'Arçon (Co-I), Marc-André Leclair (Co-I), Michaël Mayette (Co-I), Yannick Poulin (Co-I), Hector Quiroz-Martinez (Co-I), Charles St-Arnaud (Co-I), Éline Carbonneau (RC), Line Côté (RC), Marilène Ladouceur (RC), Joannie Marchand (RA), Marie-Hélène Masse (RC), Noémie Turcotte (RA)

*Centre Hospitalier de l'Université de Montréal*

Michaël Chassé (PI), Martine Lebrasseur (RC), Fatna Benettaib (RC), Dounia Boumahni (RC), Marie-Ève Cantin (RA), Ali Ghamraoui (RC), Maya Salame (RC)

*The Ottawa Hospital (General Campus and Civic Campus)*

Andrew Seely (PI), Irene Watpool (RC), Rebecca Porteous (RC), Sydney Miezitis (RA)

*Sunnybrook Health Sciences Centre*

Neill KJ Adhikari (PI), Andre Carlos Amaral (Co-I), Brian Cuthbertson (Co-I), Robert Fowler (Co-I), Damon Scales (Co-I), Nicole Marinoff (RC), Navjot Kaur (RC), Wael Mohammed (RC)

*Centre Hospitalier Universitaire de Québec-Université Laval*

François Lauzier (PI), Alexis Turgeon (Co-I), Charles Francoeur (Co-I), Guillaume Leblanc (Co-I), David Bellemare (RC), Olivier Costerousse (RC), Stéphanie Grenier (RA), Gabrielle Guilbault (RA), Marjorie Daigle (RA), Ève Cloutier (RA), Isabelle St-Hilaire (RA).

*Mount Sinai Hospital*

Sangeeta Mehta (PI), Laveena Munshi (Co-I), Sumesh Shah (RC)

*Toronto Western Hospital*

Elizabeth Wilcox (PI), Jeffrey Singh (Co-I), Karolina Walczak (RC)

*Juravinski Hospital* (activation in progress and no patients enrolled at the time of manuscript submission)

Bram Rochweg (PI), Tina Millen (RC)

**Abbreviations:**

Co-I – co-investigator; PI – principal investigator; PL – project leader; RA – research assistant; RC – research coordinator
