# Supplementary material for: Optimal VAsopressor TitraTION in patients 65 years and older (OVATION-65): protocol and statistical analysis plan for a randomised clinical trial
Source: PubMed Central journal article supplement — BMJ Open. 2020 Nov 14;10(11):e037947. doi: 10.1136/bmjopen-2020-037947 (PMC7668371; doi:10.1136/bmjopen-2020-037947), 2020-11-14
Supplement: bmjopen-2020-037947supp003.pdf [file bmjopen-2020-037947supp003.pdf]

### Online supplementary file S3 OVATION-65 ancillary studies

| Study title                                                                                                                                                | Investigators                                                                                | Primary objective                                                                                                                                                                                                                                                                                   | Secondary objective                                                                                                                                                                                                                                                                                         | Funding                                            |
|------------------------------------------------------------------------------------------------------------------------------------------------------------|----------------------------------------------------------------------------------------------|-----------------------------------------------------------------------------------------------------------------------------------------------------------------------------------------------------------------------------------------------------------------------------------------------------|-------------------------------------------------------------------------------------------------------------------------------------------------------------------------------------------------------------------------------------------------------------------------------------------------------------|----------------------------------------------------|
| Measuring baseline ascorbic acid levels in the OVATION-65 trial                                                                                            | MC Battista<br>NK Adhikari<br>F Lamontagne                                                   | Measure the associations between baseline level of plasma ascorbic acid and peak levels of biomarkers of organ injury* (measured at day 1 [baseline], day 3, and 7) in the permissive hypotension and usual care groups.<br><br>Organ injury biomarkers are specified in Table 1 of the manuscript. | Measure the association between baseline ascorbic acid and<br><br>1) total dose of vasopressors required to maintain blood pressure;<br><br>2) biomarkers of inflammation* (IL-1 $\beta$ , TNF- $\alpha$ , C-reactive protein)<br><br>3) biomarkers of endothelial injury* (thrombomodulin, angiopoietin-2) | Lotte and John Hecht Memorial Foundation           |
| Urinary biomarkers of renal injury in the OVATION-65 trial: a Nested analysis of the urinary proteome                                                      | FM Boisvert<br>MC Battista<br>NK Adhikari<br>F Lamontagne                                    | Identify and quantify, using a discovery proteomic approach, new peptides and proteins and their pattern of expression between baseline, day 3 and day 7 in the urine of patients in permissive hypotension and usual care groups.                                                                  | Measure the association between protein clusters and renal function<br><br>Validate the predictive value of biomarkers of renal injury*: TIMP2, NGAL, FABPL, CYTC, IGFBP7                                                                                                                                   | Université de Sherbrooke/<br>Merck Sharp and Dohme |
| Effects of catecholamine therapy on the immune system: unsuspected consequences of routine medical interventions and opportunities for individualized care | FM Boisvert<br>LH Tai<br>JL Parent<br>X Roucou<br>MC Battista<br>NK Adhikari<br>F Lamontagne | Compare PBMC immune response (Th1/Th2 profiles), adrenergic receptor activity, and proteomic signature between baseline and day 7 in the permissive hypotension and usual care groups                                                                                                               |                                                                                                                                                                                                                                                                                                             | Université de Sherbrooke/<br>Merck Sharp and Dohme |

Abbreviations: CYTC, cytochrome C; FABPL, fatty acid-binding protein, liver-type; IGFBP7, insulin-like growth factor-binding protein 7; IL-1 $\beta$ , interleukin-1 $\beta$ ; NGAL, neutrophil gelatinase-associated lipocalin; PBMC, peripheral blood mononuclear cell; TIMP2, tissue inhibitor of metalloproteinases 2; TNF- $\alpha$ , tumour necrosis factor- $\alpha$

\*All biomarkers are assessed at baseline (day 1) and at days 3 and 7.
